# Supplementary material for: First Observation of Unicellular Organisms Concentrating Arsenic in ACC Intracellular Inclusions
Source: Preprints.org preprint supplement (doi:10.20944/preprints202111.0267.v1), 2021-11-16

## Supplementary Information

### First observation of unicellular organisms concentrating arsenic in ACC intracellular inclusions

Agathe Martignier<sup>1</sup>, Montserrat Filella<sup>2\*</sup>, Jean-Michel Jaquet<sup>1</sup>, Mathieu Coster<sup>3</sup>  
and Daniel Ariztegui<sup>1</sup>

<sup>1</sup>*Department of Earth Sciences, University of Geneva, Geneva, Switzerland*

<sup>2</sup>*Department F.-A. Forel, University of Geneva, Geneva, Switzerland*

<sup>3</sup>*Service de l'écologie de l'Eau, Geneva, Switzerland*

## Supplementary Information index

*SI\_excel\_1.xlsx*. Databases and statistical results for As-bearing micropearls from Lakes Geneva and Titicaca.

*SI\_excel\_2.xlsx*. Example of computation of summary statistics with a regression equation on probability scale (ROS technique).

Table SI1. Sampling campaigns at location GE3 (6.2197 °E/ 46.2994 °N) in Lake Geneva (Switzerland/France).

Table SI2. Proportion of non-detects in descriptors and morpho-chemical groups.

Table SI3. Summary statistics differences between *lab* and *left-censored* data (Values of Table 1a minus values of Table 1b)

Table SI4. Discrepancies between Tables 3A (lab) and 3B (left-censored).

Table SI5. Tests on descriptors distribution shape per morpho-chemical group (Lab data).

Figure SI1. Location of the two sampling points in Lake Geneva (Switzerland/France): GE3 and SHL2.

Figure SI2. Location of the sampling point in Lake Titicaca (Bolivia/Peru).

Figure SI3. Image of three different types of micropearls present in Lake Geneva.

Figure SI4. Raw EDXS data for some samples shown in Figure 3 showing the whole energy range measured.

Figure SI5. Comparison of the composition of *Sr-Tetraselmis* (MC3) in Lake Geneva and *Sr-Titicaca* (MC4).

Figure SI6. Relationship between the size of micropearls and their arsenic concentration.

**Table SI1**

Sampling campaigns at location GE3 (46.2994 °N / 6.2197 °E) in Lake Geneva (Switzerland/France). Sampling depths generally correspond to the depth of Chl *a* maximum.

| Year | Month     | Sampling date | Depth / m |
|------|-----------|---------------|-----------|
| 2013 | June      | 21.06.2013    | 15        |
|      | August    | 06.08.2013    | 27        |
|      | September | 02.09.2013    | 23        |
| 2014 | January   | 28.01.2014    | 2         |
|      | November  | 04.11.2014    | 20        |
| 2015 | March     | 24.03.2015    | 34        |
|      | May       | 19.05.2015    | 18        |
| 2016 | March     | 30.03.2016    | 25        |
|      | April     | 21.04.2016    | 10        |
|      | June      | 14.06.2016    | 10        |
|      | July      | 12.07.2016    | 18        |
| 2017 | February  | 21.02.2017    | 15        |
|      | March     | 21.03.2017    | 6         |
|      | April     | 24.04.2017    | 10        |
|      | May       | 16.05.2017    | 20        |
|      | June      | 13.06.2017    | 10        |
|      | July      | 11.07.2017    | 16        |
|      | August    | 10.08.2017    | 10        |
|      | October   | 31.10.2017    | 8         |
|      | December  | 05.12.2017    | 2.5       |

**Table SI2**

Proportion of non-detects in descriptors and morpho-chemical groups for: (a) *lab* and (b) *left-censored* datasets. In yellow and green, descriptors retained for analysis.

| a     |        |                                          |      |      |      |      |      |      |      |      |      |      |      |      |
|-------|--------|------------------------------------------|------|------|------|------|------|------|------|------|------|------|------|------|
| MC    | Number | Lab                                      | Na   | Mg   | Al   | Si   | P    | S    | Cl   | K    | Ca   | As   | Sr   | Ba   |
| 1     | 16     | Proportion of zero values                | 0.69 | 0.25 | 0.38 | 0.81 | 1.00 | 1.00 | 0.69 | 0.81 | 0.00 | 0.00 | 0.13 | 0.00 |
| 2     | 50     |                                          | 0.50 | 0.00 | 0.66 | 0.72 | 1.00 | 1.00 | 0.54 | 0.82 | 0.00 | 0.00 | 0.30 | 0.00 |
| 3     | 70     | Conservation criterion: proportion < 0.6 | 0.67 | 0.43 | 0.77 | 0.93 | 0.67 | 0.86 | 0.60 | 0.23 | 0.00 | 0.00 | 0.03 | 0.99 |
| 4     | 34     |                                          | 0.09 | 0.32 | 0.97 | 0.97 | 0.94 | 1.00 | 0.06 | 0.24 | 0.00 | 0.00 | 0.00 | 1.00 |
| 5     | 97     |                                          | 0.68 | 0.29 | 0.75 | 0.47 | 0.99 | 1.00 | 0.74 | 0.93 | 0.00 | 0.00 | 0.82 | 0.99 |
| Total | 267    |                                          | 0.57 | 0.27 | 0.75 | 0.72 | 0.90 | 0.96 | 0.58 | 0.63 | 0.00 | 0.00 | 0.37 | 0.75 |
| b     |        |                                          |      |      |      |      |      |      |      |      |      |      |      |      |
| MC    | Number | Left-censored                            | Na   | Mg   | Al   | Si   | P    | S    | Cl   | K    | Ca   | As   | Sr   | Ba   |
| 1     | 16     | Proportion of values                     | 0.94 | 0.81 | 0.69 | 0.88 | 1.00 | 1.00 | 0.88 | 0.94 | 0.00 | 0.00 | 0.25 | 0.00 |
| 2     | 50     | below the 1.0 mol% detection level       | 0.72 | 0.00 | 0.70 | 0.72 | 1.00 | 1.00 | 0.54 | 0.98 | 0.00 | 0.00 | 0.42 | 0.00 |
| 3     | 70     |                                          | 0.80 | 0.83 | 0.86 | 0.93 | 0.71 | 0.87 | 0.79 | 0.31 | 0.00 | 0.00 | 0.07 | 1.00 |
| 4     | 34     | Conservation criterion: proportion < 0.7 | 0.09 | 0.65 | 0.97 | 0.97 | 0.94 | 1.00 | 0.06 | 0.41 | 0.00 | 0.00 | 0.00 | 1.00 |
| 5     | 97     |                                          | 0.72 | 0.29 | 0.76 | 0.59 | 0.99 | 1.00 | 0.77 | 1.00 | 0.00 | 0.00 | 0.98 | 1.00 |
| Total | 267    |                                          |      |      |      |      |      |      |      |      |      |      |      |      |

**Table SI3**

Summary statistics differences between *lab* and *left-censored* data (Values of Table 1 minus values of Table 2). Pink: descriptor present in *lab* and eliminated in *left-censored* data. Unreliable values in MC2/Cl due to poor ROS fit (see SI\_excel\_2.xlsx).

| Morpho Gr             | Ns | Nv | Stat   | Na  | Mg   | Al  | Si   | Cl   | K    | Ca  | As  | Sr   | Ba  |
|-----------------------|----|----|--------|-----|------|-----|------|------|------|-----|-----|------|-----|
| MC1                   | 16 | 5  | Mean   |     | 0.6  | 0.1 |      |      |      | 0.9 | 0.0 | -0.1 | 0.7 |
| <i>Big Ba</i>         |    |    | SD     |     |      |     |      |      |      |     |     |      |     |
|                       |    |    | Median |     | 0.3  | 0.3 |      |      |      | 1.2 | 0.0 | 0.1  | 1.0 |
| MC2                   | 50 | 6  | Mean   | 0.7 | 0.2  |     |      | -1.1 |      | 0.3 | 0.1 | -0.2 | 1.2 |
| <i>Small Ba</i>       |    |    | SD     |     |      |     |      |      |      |     |     |      |     |
|                       |    |    | Median | 0.1 | 0.0  |     |      | -3.0 |      | 1.0 | 0.2 | 0.0  | 0.9 |
| MC3                   | 70 | 4  | Mean   |     | 0.5  |     |      |      | -0.1 | 3.6 | 0.1 | 0.1  |     |
| <i>Sr-Tetraselmis</i> |    |    | SD     |     |      |     |      |      |      |     |     |      |     |
|                       |    |    | Median |     | 0.3  |     |      |      | 0.0  | 2.5 | 0.1 | 0.2  |     |
| MC4                   | 34 | 7  | Mean   | 0.0 | -0.4 |     |      | 0.0  | -0.1 | 0.3 | 0.1 | 0.1  |     |
| <i>Sr-Titicaca</i>    |    |    | SD     |     |      |     |      |      |      |     |     |      |     |
|                       |    |    | Median | 0.0 | -0.8 |     |      | 0.0  | 0.0  | 0.0 | 0.0 | 0.0  |     |
| MC5                   | 97 | 4  | Mean   |     | -0.6 |     | -0.2 |      |      | 2.3 | 0.2 |      |     |
| <i>MgAs</i>           |    |    | SD     |     |      |     | 0.0  |      |      |     |     |      |     |
|                       |    |    | Median |     | 0.2  |     | -0.5 |      |      | 2.4 | 0.1 |      |     |

**Table SI4**

Discrepancies between tables of difference/similarity (Table 3A and 3B) for *lab* and ROS datasets. L pink: the groups differ with respect to given descriptor in *lab* dataset, but not in ROS. R pink: the groups differ with respect to given descriptor in ROS dataset, but not in *lab*. L green: the groups do not differ with respect to given descriptor in *lab* dataset. R green: the groups do not differ with respect to given descriptor in ROS dataset.

|           |     |     |     |     |     |     |
|-----------|-----|-----|-----|-----|-----|-----|
| <b>Na</b> |     | MC1 | MC2 | MC3 | MC4 | MC5 |
|           | MC1 |     |     |     |     |     |
|           | MC2 |     |     |     |     |     |
|           | MC3 |     |     |     |     |     |
|           | MC4 |     | D   |     |     |     |
|           | MC5 |     |     |     |     |     |
| <b>Mg</b> |     | MC1 | MC2 | MC3 | MC4 | MC5 |
|           | MC1 |     |     |     |     |     |
|           | MC2 | D   |     |     |     |     |
|           | MC3 | S   | D   |     |     |     |
|           | MC4 | S   |     | S   |     |     |
|           | MC5 | D   |     | D   |     |     |
| <b>Al</b> |     | MC1 | MC2 | MC3 | MC4 | MC5 |
|           | MC1 |     |     |     |     |     |
|           | MC2 |     |     |     |     |     |
|           | MC3 |     |     |     |     |     |
|           | MC4 |     |     |     |     |     |
|           | MC5 |     |     |     |     |     |
| <b>Si</b> |     | MC1 | MC2 | MC3 | MC4 | MC5 |
|           | MC1 |     |     |     |     |     |
|           | MC2 |     |     |     |     |     |
|           | MC3 |     |     |     |     |     |
|           | MC4 |     |     |     |     |     |
|           | MC5 |     |     |     |     |     |
| <b>Cl</b> |     | MC1 | MC2 | MC3 | MC4 | MC5 |
|           | MC1 |     |     |     |     |     |
|           | MC2 |     |     |     |     |     |
|           | MC3 |     |     |     |     |     |
|           | MC4 |     | D   |     |     |     |
|           | MC5 |     |     |     |     |     |
| <b>K</b>  |     | MC1 | MC2 | MC3 | MC4 | MC5 |
|           | MC1 |     |     |     |     |     |
|           | MC2 |     |     |     |     |     |
|           | MC3 |     |     |     |     |     |
|           | MC4 |     |     | S   |     |     |
|           | MC5 |     |     |     |     |     |
| <b>Ca</b> |     | MC1 | MC2 | MC3 | MC4 | MC5 |
|           | MC1 |     |     |     |     |     |
|           | MC2 |     |     |     |     |     |
|           | MC3 |     |     |     |     |     |
|           | MC4 |     |     |     |     |     |
|           | MC5 |     |     |     |     |     |
| <b>As</b> |     | MC1 | MC2 | MC3 | MC4 | MC5 |
|           | MC1 |     |     |     |     |     |
|           | MC2 |     |     |     |     |     |
|           | MC3 |     |     |     |     |     |
|           | MC4 |     |     |     |     |     |
|           | MC5 |     |     |     |     |     |
| <b>Sr</b> |     | MC1 | MC2 | MC3 | MC4 | MC5 |
|           | MC1 |     |     |     |     |     |
|           | MC2 |     |     |     |     |     |
|           | MC3 |     |     |     |     |     |
|           | MC4 |     |     |     |     |     |
|           | MC5 |     |     |     |     |     |
| <b>Ba</b> |     | MC1 | MC2 | MC3 | MC4 | MC5 |
|           | MC1 |     |     |     |     |     |
|           | MC2 |     |     |     |     |     |
|           | MC3 |     |     |     |     |     |
|           | MC4 |     |     |     |     |     |
|           | MC5 |     |     |     |     |     |

**Table SI5**

Tests on descriptors distribution type per morpho-chemical group (*lab* data). Normality tested by Shapiro-Wilks W criterion ( $p \geq 0.05$ ). Blue: normal; green: lognormal. Bimodality (gold) evaluated by visual inspection.

| Morpho group | Number of descriptors | Distribution | Na | Mg | Al | Si | Cl | K | Ca | As | Sr | Ba |
|--------------|-----------------------|--------------|----|----|----|----|----|---|----|----|----|----|
| MC1          | 3                     | Normal       |    |    |    |    |    |   |    |    |    |    |
|              |                       | Lognormal    |    |    |    |    |    |   |    |    |    |    |
|              |                       | Bimodal      |    |    |    |    |    |   |    |    |    |    |
| MC2          | 6                     | Normal       |    |    |    |    |    |   |    |    |    |    |
|              |                       | Lognormal    |    |    |    |    |    |   |    |    |    |    |
|              |                       | Bimodal      |    |    |    |    |    |   |    |    |    |    |
| MC3          | 5                     | Normal       |    |    |    |    |    |   |    |    |    |    |
|              |                       | Lognormal    |    |    |    |    |    |   |    |    |    |    |
|              |                       | Bimodal      |    |    |    |    |    |   |    |    |    |    |
| MC4          | 7                     | Normal       |    |    |    |    |    |   |    |    |    |    |
|              |                       | Lognormal    |    |    |    |    |    |   |    |    |    |    |
|              |                       | Bimodal      |    |    |    |    |    |   |    |    |    |    |
| MC5          | 4                     | Normal       |    |    |    |    |    |   |    |    |    |    |
|              |                       | Lognormal    |    |    |    |    |    |   |    |    |    |    |
|              |                       | Bimodal      |    |    |    |    |    |   |    |    |    |    |
| Majority:    |                       | Normal       |    |    |    |    |    |   |    |    |    |    |
|              |                       | Lognormal    | X  | X  | X  | X  | X  | X | X  | X  | X  |    |
|              |                       | Bimodal      | X  |    |    |    |    | X |    |    | X  |    |

**FIGURE SI1.** Location of the two sampling points in Lake Geneva (Switzerland/France): GE3 (46.2994 °N / 6.2197 °E) and SHL2 (46.452 °N / 6.589 °E). Bathymetry drawn by University of Geneva and University of Bern (data from Canton de Vaud). Topographic layout from Kremer et al., 2014<sup>a</sup> (data from Swisstopo).

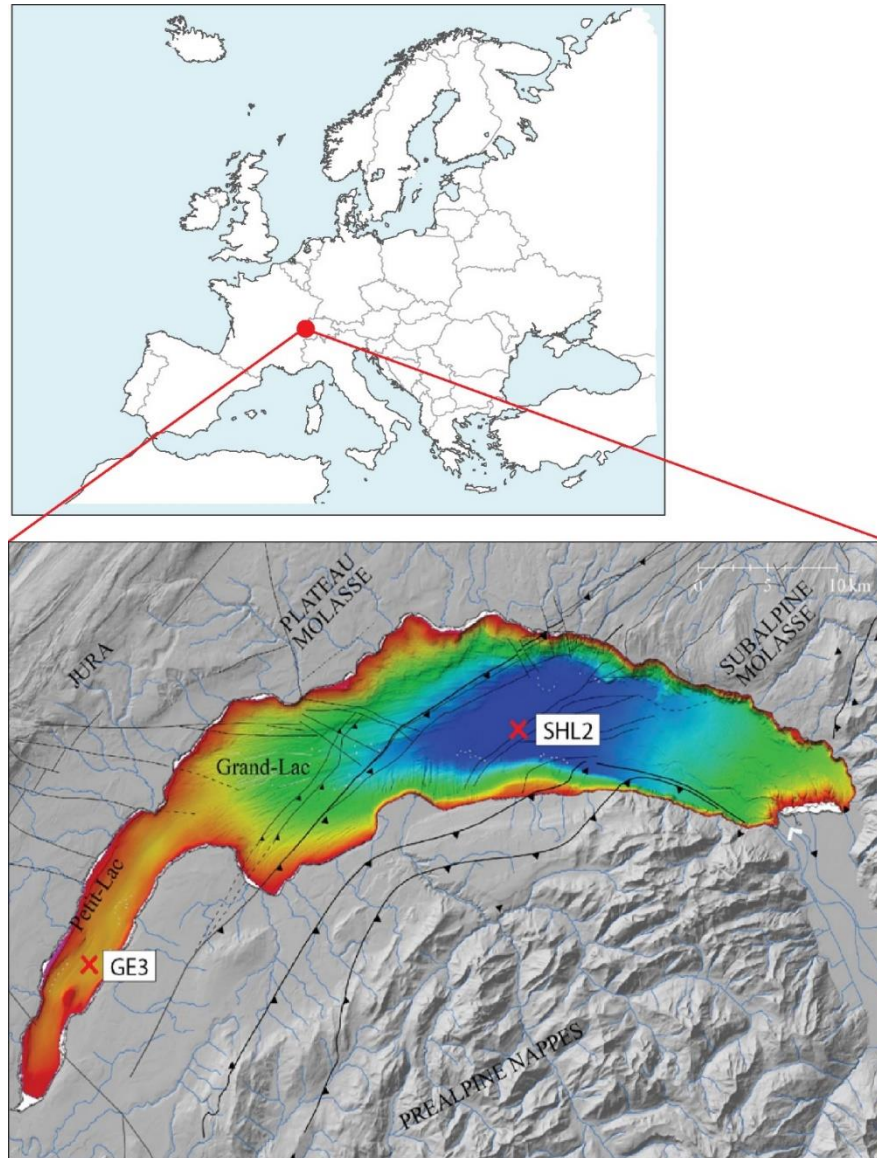

<sup>a</sup>Kremer, K., Marillier, F., Hilbe, M., Simpson, G., Dupuy, D., Yrro, B.J.F., Rachoud-Schneider, A.-M., Corboud, P., Bellwald, B., Wildi, W., and Girardclos, S. 2014. Lake dwellers occupation gap in Lake Geneva (France–Switzerland) possibly explained by an earthquake–mass movement–tsunami event during Early Bronze Age. *Earth and Planetary Science Letters* 385:28-39.



**FIGURE SI2.** Location of the sampling point in Lake Titicaca (Bolivia/Peru). Coordinates: 16.19991 °S / 68.78534 °W. Source: Stephane Guédron.

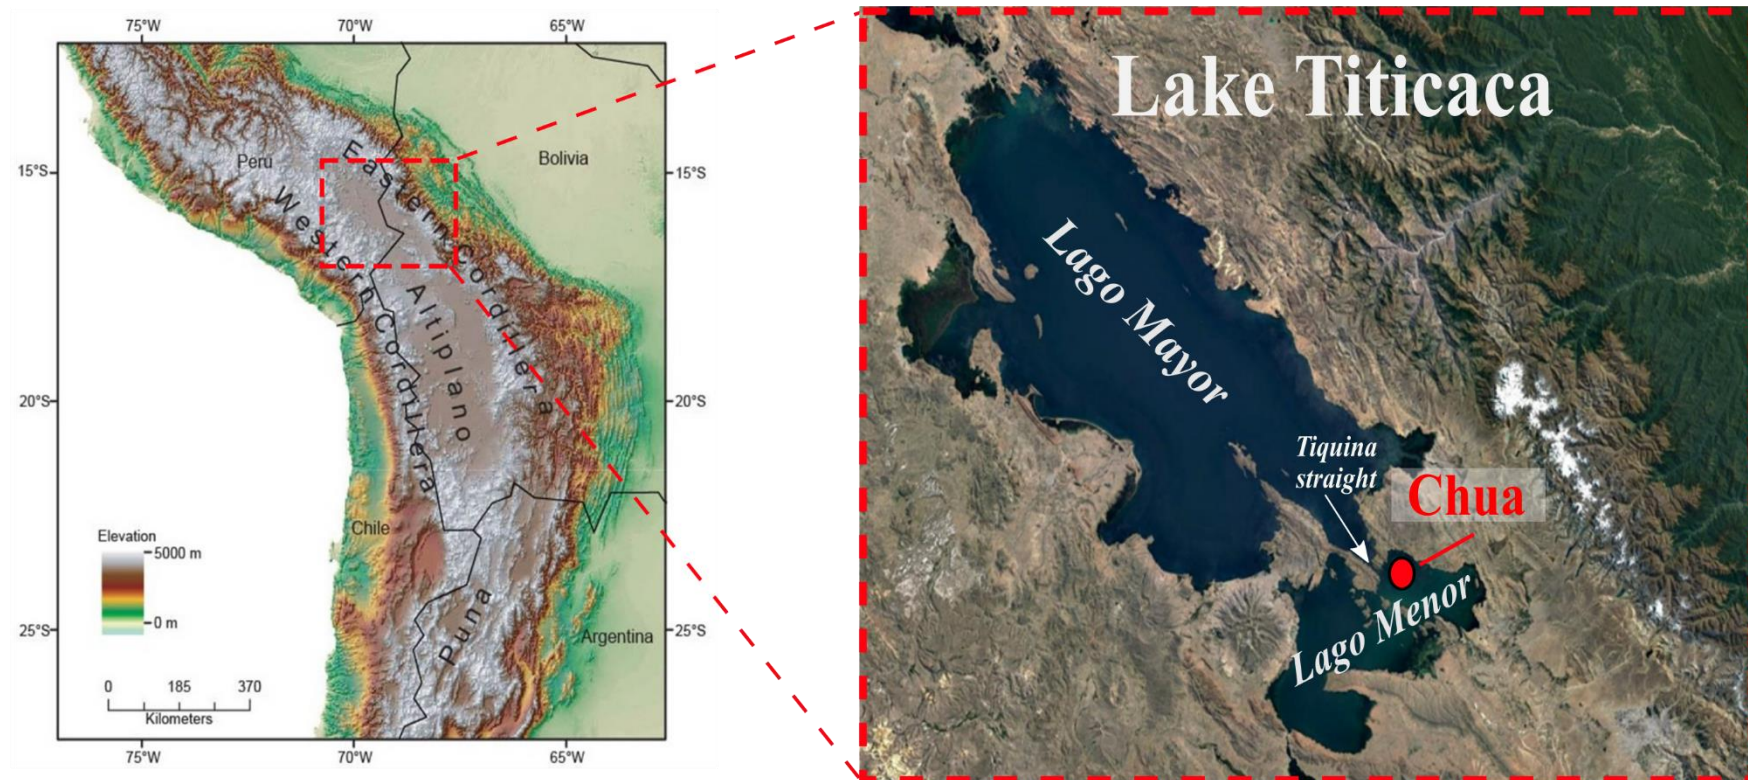

**FIGURE SI3.** Image of three different types of micropearls present in Lake Geneva. Backscattered SEM image of a dried filter. Water sample taken in Lake Geneva (Switzerland) at SHL2 location, on 11 May 2015, at 10 m depth. The three different micropearl types are indicated by red arrows. The micropearls highly enriched in barium (small Ba micropearls, MC2) appear in white due to their higher atomic mass. The other micropearl types (Sr (MC3) and MgAs (MC5) micropearls) appear light grey. Note the globular cell of the *Tetraselmis cordiformis* algae (Sr-*Tetraselmis* micropearls). The small black dots in the background are the pores of the filter (0.2  $\mu\text{m}$ ). Most of the other items present on the image are frustules of diatoms.

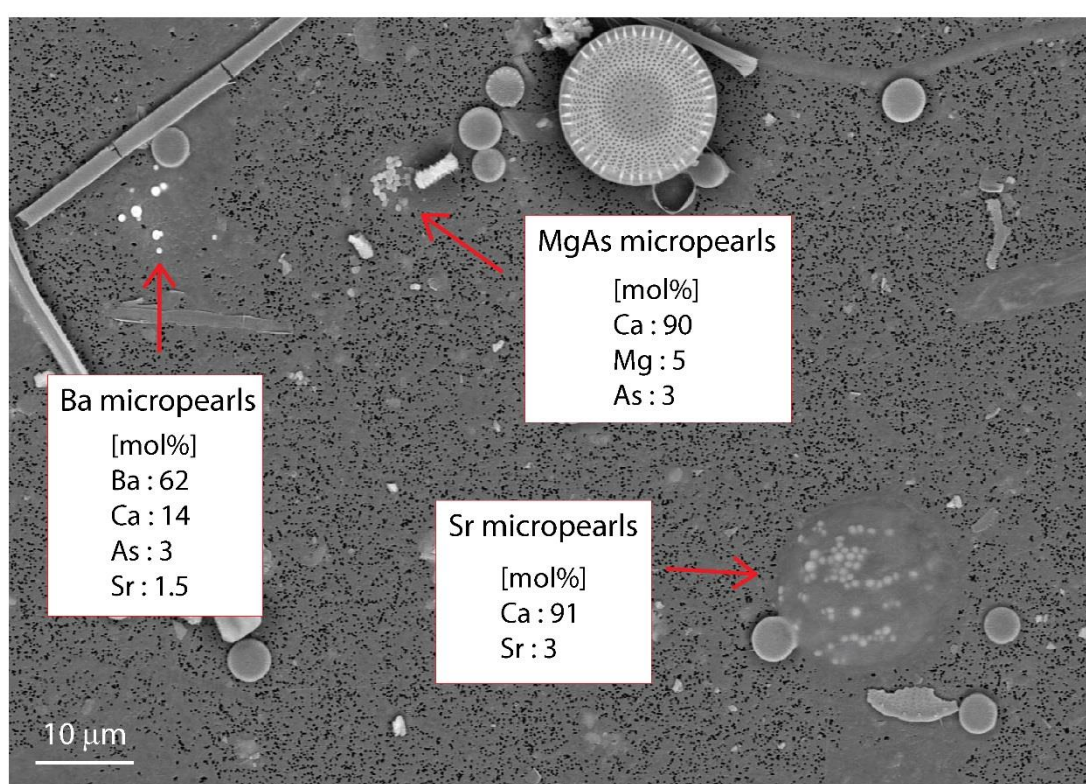

**FIGURE SI4.** Raw EDXS data for samples in Figure 2 showing the whole energy range measured.

### Sample a1

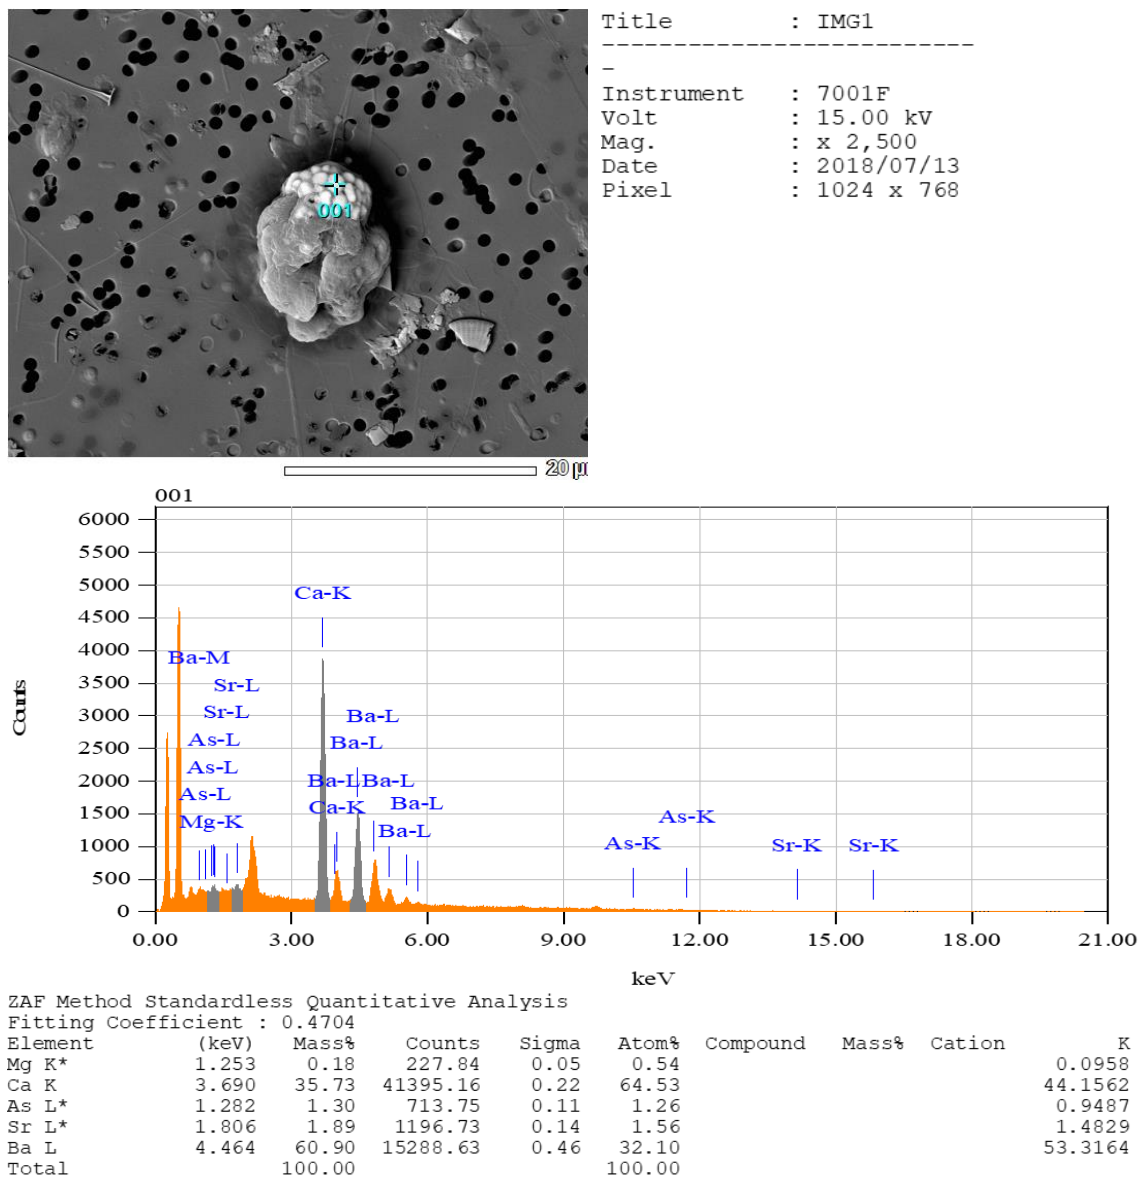

## Sample a2

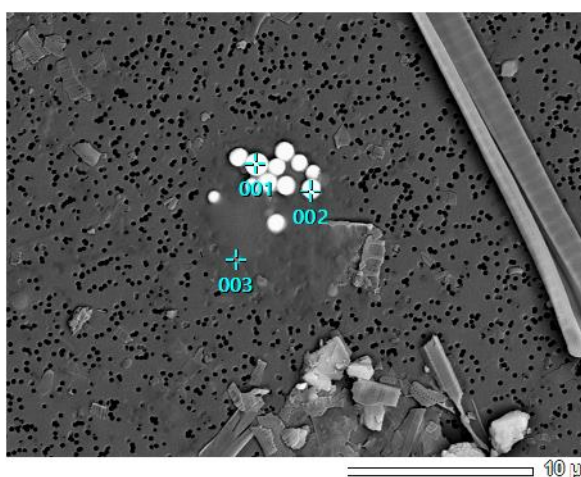

Title : IMG1  
-----  
Instrument : 7001F  
Volt : 15,00 kV  
Mag. : x 3,700  
Date : 2016/09/16  
Pixel : 1024 x 768

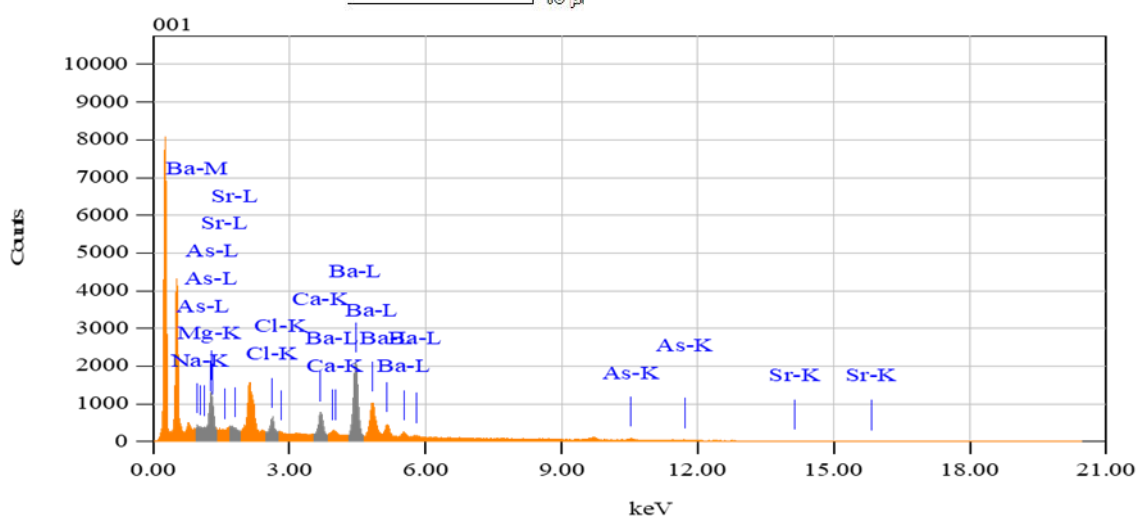

ZAF Method Standardless Quantitative Analysis

Fitting Coefficient : 0.6804

| Element | (keV) | Mass%  | Sigma | Atom%  | Compound | Mass% | Cation | K       |
|---------|-------|--------|-------|--------|----------|-------|--------|---------|
| Na K*   |       |        |       |        |          |       |        |         |
| Mg K    | 1.253 | 2.32   | 0.07  | 9.25   |          |       |        | 1.2963  |
| Cl K    | 2.621 | 2.85   | 0.04  | 7.80   |          |       |        | 3.1145  |
| Ca K    | 3.690 | 5.83   | 0.07  | 14.11  |          |       |        | 7.8492  |
| As L*   | 1.282 | 10.03  | 0.16  | 12.98  |          |       |        | 7.7927  |
| Sr L*   | 1.806 | 0.29   | 0.14  | 0.32   |          |       |        | 0.2252  |
| Ba L    | 4.464 | 78.68  | 0.27  | 55.55  |          |       |        | 79.7220 |
| Total   |       | 100.00 |       | 100.00 |          |       |        |         |



## Sample c

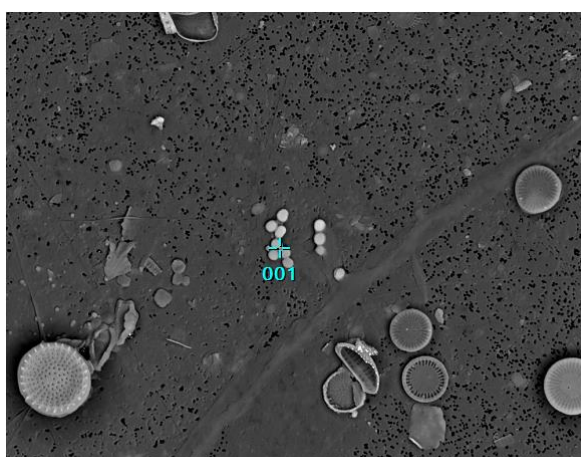

Title : IMG1  
-----  
Instrument : 7001F  
Volt : 15,00 kV  
Mag. : x 2,000  
Date : 2016/03/16  
Pixel : 1024 x 768

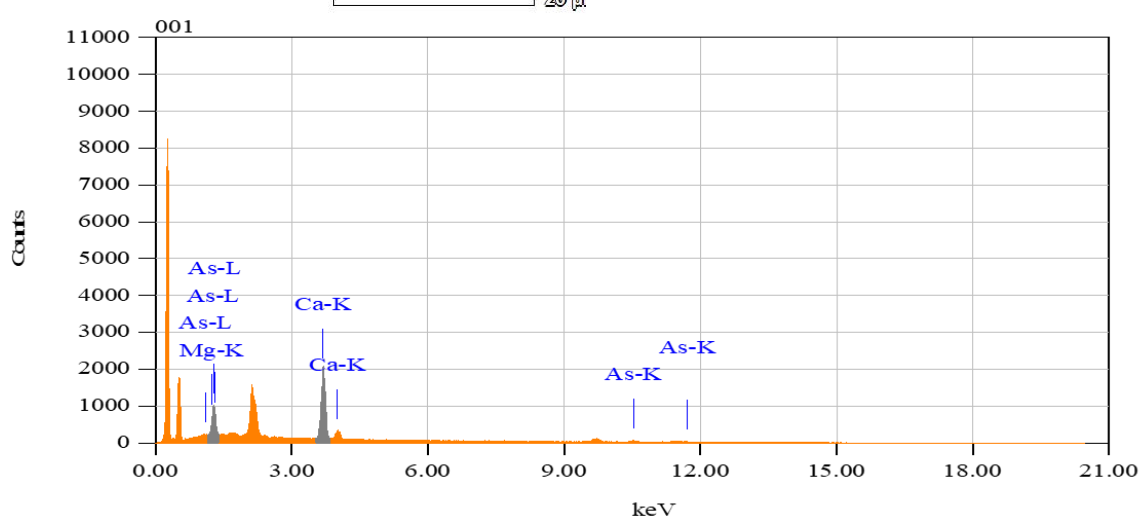

ZAF Method Standardless Quantitative Analysis  
Fitting Coefficient : 0.8279

| Element | (keV) | Mass%  | Sigma  | Atom%  | Compound | Mass% | Cation | K       |
|---------|-------|--------|--------|--------|----------|-------|--------|---------|
| Mg K    | 1.253 | 3.39   | 115.28 | 6.13   |          |       |        | 2.2626  |
| Ca K    | 3.690 | 72.83  | 679.07 | 79.91  |          |       |        | 75.9640 |
| As L    | 1.282 | 23.78  | 396.38 | 13.96  |          |       |        | 21.7734 |
| Total   |       | 100.00 |        | 100.00 |          |       |        |         |

**FIGURE SI5.** Comparison of the composition of *Sr-Tetraselmis* (MC3) in Lake Geneva and *Sr-Titicaca* (MC4). Asterisk: statistically significant difference ( $p = 0.95$ ).

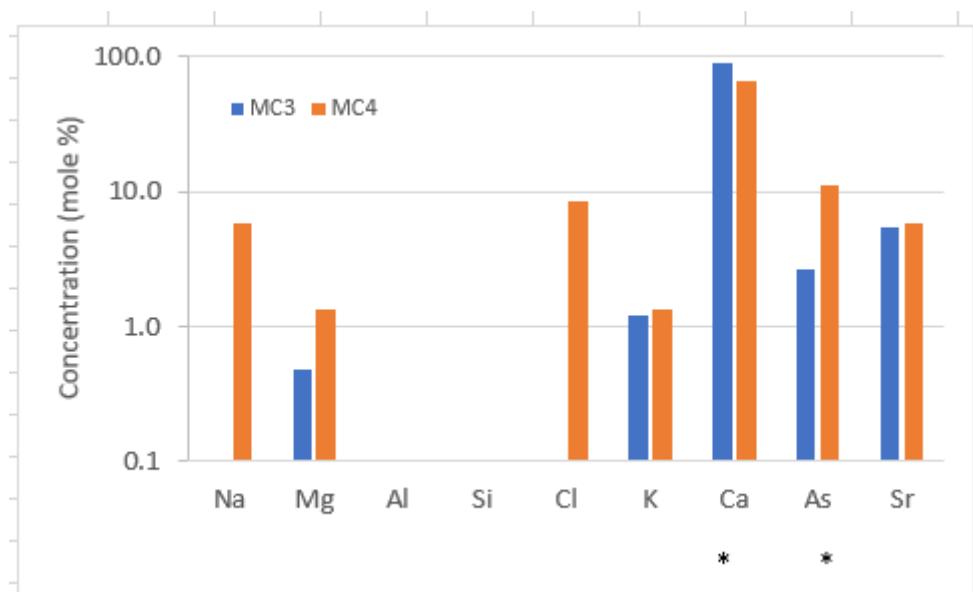

**FIGURE SI6.** Relationship between the size of micropearls and their arsenic concentration. SEM secondary images of small areas of dried filters where MgAs micropearls expelled from their cell during filtration can be observed. Water sample taken from location GE3 in Lake Geneva, on 19 May 2015, at 18 m depth. (a) and (b): zoomed-in images of micropearls. Some of them appear partially dissolved. (c): general view of the MgAs micropearl cluster. Areas where the pores are not seen are patches of organic matter, remnants of the cell which produced the micropearls. SEM-EDXS measurements show that larger micropearls show higher As concentrations than small ones. The small black dots scattered through the image are the pores of the filter (0.2  $\mu\text{m}$ ). Thin scale bar (a and b): 500 nm. Thick scale bar (c): 1  $\mu\text{m}$ .

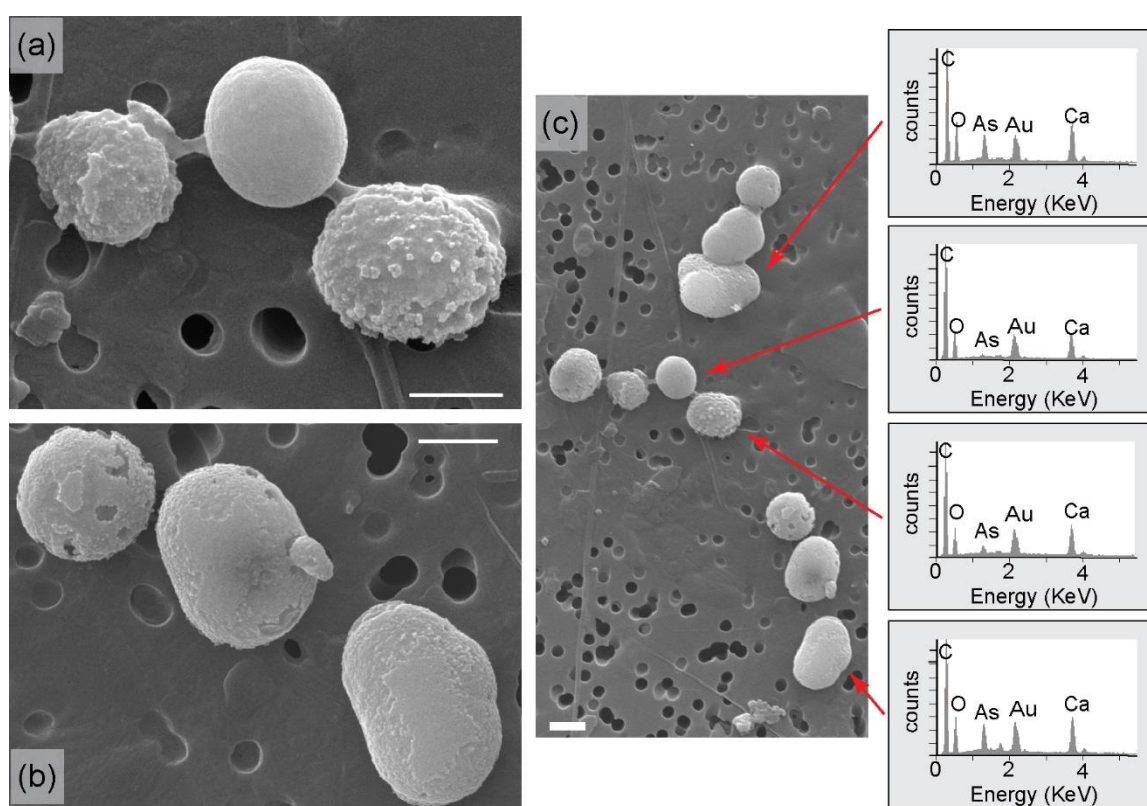

Supplement: Supplementary file 1 [file supplementary]
