# Supplementary material for: First Observation of Unicellular Organisms Concentrating Arsenic in ACC Intracellular Inclusions
Source: Preprints.org preprint supplement (doi:10.20944/preprints202111.0267.v1), 2021-11-16
Supplement: Supplementary file 1 [file SI_excel_1.xlsx]

## Sheet: 1) BD Arsenic
No	OldNo	Nam Morpho	Morpho	Id	Na	Mg	Al	Si	P	S	Cl	K	Ca	As	Sr	Ba	MgCaAs	Mg c	Ca c	As c	AsSrBa	As d	Sr d	Ba d	MgAsBa	Mg e	As e	Ba e
L001	364	Big Ba	1	sp_ge_120710_01a_006.0_364.1a_08_an15a-01-b	0	0	0.99	1.56	0	0	0	0	56.74	2.07	1.69	36.94	1.70039	0	0.964802	0.0351981	2.457	0.05086	0.0415233	0.907617	2.56345	0	0.0530633	0.946937
L002	364	Big Ba	1	sp_ge_120710_01a_006.0_364.1a_08_an15a-02-b	0	0	0.46	0.66	0	0	0	0	57.84	2.54	1.41	37.09	1.65618	0	0.957933	0.0420669	2.43665	0.0618908	0.0343567	0.903752	2.52334	0	0.0640929	0.935907
L072	480	Big Ba	1	sp_ge_131001_13a_002.5_480.1a_06_an18a-04-b	0	0	1.09	0	0	0	0.27	0.14	55.89	1.07	1.79	39.75	1.75562	0	0.981215	0.0187851	2.34687	0.0251115	0.0420089	0.93288	2.44978	0	0.0262126	0.973787
L073	480	Big Ba	1	sp_ge_131001_13a_002.5_480.1a_14_an12a-02-b	0	1.15	2.34	0	0	0	0.79	0	62.33	1.16	2.36	29.86	1.54703	0.0177908	0.964264	0.0179455	2.99581	0.0347513	0.070701	0.894548	3.10849	0.0357476	0.0360584	0.928194
L079	480	Big Ba	1	sp_ge_131001_13a_002.5_480.1a_30_an13a-01-b	0	0.27	0	0	0	0	0.79	0.04	61.96	1.93	2.47	32.54	1.5586	0.00420823	0.965711	0.030081	2.70709	0.0522469	0.0668652	0.880888	2.87853	0.00777202	0.0555556	0.936672
L105	673	Big Ba	1	sp_ge_150324_31b_034.0_673.1a_05_an05a-04-b	9.15	2.18	1.12	1.72	0	0	2.33	0	42.88	1.1	1.69	37.82	2.16638	0.047227	0.928943	0.0238302	2.46245	0.0270869	0.0416154	0.931298	2.43309	0.0530414	0.026764	0.920195
L141	201	Big Ba	1	sp_ge_150519_34a_018.0_703.1a_06_an05a-01-b	0	0	1.12	0	0	0	0	0	56.53	1.42	2.11	38.83	1.72563	0	0.975496	0.0245039	2.36072	0.0335222	0.0498111	0.916667	2.48447	0	0.0352795	0.96472
L149		Big Ba	1	sp_ge_180612_60a_011.0_902.1a_09_an02a-02-b	0	0.15	0	0	0	0	0	0	46.88	1.53	4.89	46.55	2.05931	0.00308896	0.965404	0.0315074	1.88786	0.0288843	0.0923164	0.878799	2.0734	0.0031101	0.031723	0.965167
L151		Big Ba	1	sp_ge_151103_39a_010.0_781.1a_29_an16a-02-l	0	0.55	4.71	0	0	0	0	0	55.55	1.4	3.73	34.06	1.73913	0.00956522	0.966087	0.0243478	2.55167	0.0357234	0.0951773	0.869099	2.77701	0.0152735	0.0388781	0.945848
L152		Big Ba	1	sp_ge_180710_61a_0-50._909.1a_09_an01a-02-?	0	1.87	0	0	0	0	0	0	44.86	1.04	0	52.23	2.09336	0.0391459	0.939083	0.021771	1.87723	0.0195232	0	0.980477	1.81357	0.0339137	0.0188611	0.947225
L153		Big Ba	1	sp_ge_180710_61a_0-50._909.1a_20_an03a-01-?	0	0.54	0	0	0	0	0	0	64.54	1.26	1.56	32.1	1.50739	0.00813989	0.972867	0.0189931	2.86369	0.0360825	0.0446735	0.919244	2.94985	0.0159292	0.0371681	0.946903
L154		Big Ba	1	sp_ge_180710_61a_0-50._909.1a_34_an06a-01-?	0	0.26	0	0	0	0	0	0	59.37	1.01	1.85	37.51	1.64908	0.0042876	0.979057	0.0166557	2.47709	0.0250186	0.0458261	0.929155	2.57865	0.00670449	0.0260444	0.967251
L155		Big Ba	1	sp_ge_151103_39a_010.0_781.1a_39_an22a-01-l	0.75	0.25	0.79	0	0	0	0	0	59.9	2.03	1.43	34.84	1.60823	0.00402059	0.963332	0.0326472	2.61097	0.0530026	0.0373368	0.909661	2.69397	0.00673491	0.0546875	0.938578
L156		Big Ba	1	sp_ge_151103_39a_010.0_781.1a_39_an22a-02-l	0.4	0.31	0.19	0	0	0	0	0	66.04	1.09	0.72	31.25	1.4828	0.00459668	0.979241	0.0161625	3.0248	0.0329704	0.0217786	0.945251	3.06279	0.00949464	0.0333844	0.957121
L157		Big Ba	1	sp_ge_151103_39a_010.0_781.1a_54_an30a-01-l	0.72	0.6	0.7	0	0	0	0	0	72.72	1.11	0.72	23.44	1.34354	0.00806127	0.977025	0.0149133	3.95726	0.0439256	0.0284923	0.927582	3.97614	0.0238569	0.0441352	0.932008
L203		Big Ba	1	sp_ge_160712_45a_018.0_834.1a_43_an06a-03-g	0.52	0.93	0	0	0	0	5.48	1.38	54.38	1.42	0	35.89	1.76274	0.0163934	0.958576	0.0250308	2.68025	0.0380595	0	0.96194	2.61506	0.0243201	0.0371339	0.938546
L019	413	Small Ba	2	sp_ge_130611_08a_018.5_413.1a_04_an05a-01-b	0	12.04	2.64	6.76	0	0	0	0	14.57	9.98	0	54.01	2.73299	0.329052	0.398196	0.272752	1.56274	0.155962	0	0.844038	1.31527	0.158359	0.131264	0.710377
L034	420	Small Ba	2	sp_ge_130621_09a_015.0_420.2a_04_an04a-01-b	1.95	10.05	3.89	0	0	0	0	0	16.13	1.17	2.5	64.32	3.65631	0.367459	0.589762	0.0427788	1.4708	0.0172084	0.0367701	0.946021	1.3238	0.133042	0.0154885	0.851469
L093	619	Small Ba	2	sp_ge_141104_24b_020.0_619.4b_01_an01a-01-b	2.78	8.56	1.53	0	0	0	0	0	16.47	4.91	1.45	64.31	3.34001	0.285905	0.5501	0.163995	1.41503	0.0694779	0.0205179	0.910004	1.28568	0.110054	0.0631268	0.826819
L094	619	Small Ba	2	sp_ge_141104_24b_020.0_619.4b_01_an01a-02-b	1.62	8.44	0.93	0	0	0	0	0.25	13.27	2.3	1.39	71.8	4.16493	0.35152	0.552686	0.0957934	1.32468	0.0304676	0.018413	0.951119	1.21153	0.102253	0.0278653	0.869881
L095	619	Small Ba	2	sp_ge_141104_24b_020.0_619.4b_01_an01a-03-b	2.92	9.35	3.22	0	0	0	0	0	12.91	2.42	2.14	67.04	4.05186	0.378849	0.523096	0.0980551	1.39665	0.0337989	0.0298883	0.936313	1.26887	0.11864	0.0307068	0.850653
L096	619	Small Ba	2	sp_ge_141104_24b_020.0_619.4b_02_an02a-01-b	3.75	8.84	1.27	0	0	0	0	0.21	15.59	2.36	2.07	65.91	3.73274	0.329974	0.581934	0.0880926	1.42167	0.0335513	0.0294285	0.93702	1.29685	0.114641	0.0306056	0.854753
L097	619	Small Ba	2	sp_ge_141104_24b_020.0_619.4b_02_an02a-02-b	3.54	9.3	1.84	0	0	0	0	0	12.7	2.41	2.57	67.64	4.09668	0.380991	0.520279	0.09873	1.37703	0.0331865	0.0353897	0.931424	1.26024	0.117202	0.0303718	0.852426
L098	619	Small Ba	2	sp_ge_141104_24b_020.0_619.4b_02_an02a-03-b	2.65	10.14	1.52	0	0	0	0	0.08	14.68	1.67	1.84	67.43	3.77501	0.382786	0.554171	0.0630427	1.40964	0.023541	0.0259374	0.950522	1.26199	0.127966	0.0210752	0.850959
L114	198	Small Ba	2	sp_ge_150511_33a_010.0_697.1a_01_an01a-01-b	0	8.84	0	3.9	0	0	6.2	0	14.1	2.96	1.66	62.34	3.861	0.341313	0.544402	0.114286	1.49343	0.0442055	0.0247909	0.931004	1.3488	0.119234	0.0399245	0.840842
L115	198	Small Ba	2	sp_ge_150511_33a_010.0_697.1a_01_an01a-02-b	0	7.16	0	1.92	0	0	7.51	0	19.14	3.09	1.42	59.75	3.40252	0.24362	0.651242	0.105138	1.55618	0.0480859	0.0220977	0.929816	1.42857	0.102286	0.0441429	0.853571
L117	198	Small Ba	2	sp_ge_150511_33a_010.0_697.1a_04_an03a-01-b	0.61	10.67	0	4	0	0	6.34	0	12.03	3.21	1.37	61.78	3.85951	0.41181	0.464299	0.12389	1.50693	0.0483725	0.020645	0.930983	1.3217	0.141026	0.0424266	0.816548
L118	198	Small Ba	2	sp_ge_150511_33a_010.0_697.1a_04_an03a-02-b	0	7.42	0	6.03	0	0	6.22	0	13.48	3.3	1.34	62.21	4.13223	0.306612	0.557025	0.136364	1.49589	0.0493642	0.0200449	0.930591	1.37118	0.101741	0.0452489	0.85301
L121	198	Small Ba	2	sp_ge_150511_33a_010.0_697.1a_08_an07a-01-b	0	7.66	2.48	10.3	0	0	6.54	0	14.18	1.91	0	56.93	4.21053	0.322526	0.597053	0.0804211	1.69952	0.0324609	0	0.967539	1.50376	0.115188	0.0287218	0.85609
L122	198	Small Ba	2	sp_ge_150511_33a_010.0_697.1a_08_an07a-02-b	0	7.13	0	0	0	0	11.43	0	16.35	2.74	0.93	61.42	3.81388	0.27193	0.62357	0.1045	1.53633	0.0420956	0.0142879	0.943617	1.40272	0.100014	0.0384346	0.861551
L124	198	Small Ba	2	sp_ge_150511_33a_010.0_697.1a_12_an10a-01-b	0	9.33	0	0	0	0	6.28	0	16.97	1.42	1.75	64.25	3.6075	0.33658	0.612193	0.0512266	1.48324	0.021062	0.0259567	0.952981	1.33333	0.1244	0.0189333	0.856667
L128	201	Small Ba	2	sp_ge_150519_34a_018.0_703.1a_02_an02b-01-b	0.72	10.64	0.99	1.76	0	0	0	0.37	15.14	4.3	1.36	64.71	3.32447	0.353723	0.503324	0.142952	1.42106	0.0611056	0.0193264	0.919568	1.25549	0.133584	0.0539862	0.812429
L129	201	Small Ba	2	sp_ge_150519_34a_018.0_703.1a_02_an02b-02-b	1.28	9.98	1.4	2.54	0	0	0	0	11.37	6.03	0.92	66.48	3.6523	0.3645	0.415267	0.220234	1.36184	0.082119	0.0125289	0.905352	1.21227	0.120984	0.0730998	0.805916
L138	201	Small Ba	2	sp_ge_150519_34a_018.0_703.1a_04_an03b-01-b	0.41	13.44	1.31	3.36	0	0	0	0.58	10.48	2.2	1.4	66.82	3.82848	0.514548	0.401225	0.0842266	1.42005	0.0312411	0.0198807	0.948878	1.21271	0.162988	0.0266796	0.810332
L139	201	Small Ba	2	sp_ge_150519_34a_018.0_703.1a_05_an04b-01-b	1.97	9.96	2.8	2.62	0	0	0	0.36	13.59	4.55	1.13	63	3.55872	0.354448	0.48363	0.161922	1.45603	0.0662493	0.0164531	0.917298	1.29016	0.1285	0.0587021	0.812798
L140	201	Small Ba	2	sp_ge_150519_34a_018.0_703.1a_05_an04b-02-b	1.45	10.7	1.75	2.53	0	0	0	1.07	8.29	2.37	1.64	70.2	4.68165	0.500936	0.388109	0.110955	1.34753	0.0319364	0.0220994	0.945964	1.20091	0.128498	0.0284616	0.843041
L142	853	Small Ba	2	sp_ge_170424_49a_010.0_853.1a_06_an04a-01-b	0	12.23	0	0	0	0	0	0	20.01	8.06	0	59.7	2.48139	0.303474	0.496526	0.2	1.4758	0.118949	0	0.881051	1.25016	0.152894	0.100763	0.746343
L143	853	Small Ba	2	sp_ge_170424_49a_010.0_853.1a_06_an04a-02-b	0	12.66	0	0	0	0	0	0	21.69	1.72	0	63.93	2.77239	0.350984	0.601331	0.0476851	1.52323	0.0261995	0	0.9738	1.27698	0.161665	0.021964	0.816371
L144	201	Small Ba	2	sp_ge_150519_34a_018.0_703.1a_09_an06b-01-b	1.57	9.35	1.91	2.02	0	0	0	0	14.02	4.81	1.38	64.92	3.54862	0.331796	0.497516	0.170688	1.40627	0.0676417	0.0194066	0.912952	1.26454	0.118235	0.0608245	0.820941
L145	201	Small Ba	2	sp_ge_150519_34a_018.0_703.1a_09_an06b-02-b	0.27	9.88	2.38	2.43	0	0	0	0	13.69	5.32	0.84	65.18	3.46141	0.341987	0.473866	0.184147	1.40174	0.0745725	0.0117746	0.913653	1.24409	0.122916	0.0661856	0.810898
L153		Small Ba	2	sp_ge_151103_39a_010.0_781.1a_33_an18a-01-l	0	12.46	1.09	0	0	0	0	0	18.05	1.27	5.38	61.75	3.14663	0.39207	0.567967	0.0399622	1.46199	0.0185673	0.078655	0.902778	1.32485	0.165077	0.0168256	0.818098
L168		Small Ba	2	sp_ge_160517_43a_010.0_823.1a_01_an01a-01-l	1.2	9.06	0	0	0	0	0	0	20.75	2.5	1.87	64.62	3.09502	0.280409	0.642216	0.0773754	1.44949	0.0362371	0.0271054	0.936657	1.31268	0.118929	0.032817	0.848254
L169		Small Ba	2	sp_ge_160517_43a_010.0_823.1a_02_an02a-01-l	1.11	10.58	0	0	0	0	0	0	19.17	2.33	2.13	64.69	3.11721	0.3298	0.597569	0.0726309	1.44613	0.0336949	0.0308026	0.935503	1.28866	0.13634	0.0300258	0.833634
L170		Small Ba	2	sp_ge_160517_43a_010.0_823.1a_13_an08a-01-l	0.51	10.97	0	0	0	0	0	0	18.48	1.81	1.18	67.04	3.19898	0.350928	0.591171	0.0579015	1.42796	0.0258461	0.0168499	0.957304	1.25282	0.137434	0.022676	0.83989
L171		Small Ba	2	sp_ge_160517_43a_010.0_823.1a_13_an08a-02-l	0.33	11.26	0	0	0	0	0	0	16.77	1.78	0.94	68.92	3.35458	0.377726	0.562563	0.0597115	1.39587	0.0248465	0.0131212	0.962032	1.22011	0.137384	0.0217179	0.840898
L172		Small Ba	2	sp_ge_160517_43a_010.0_823.1a_15_an09a-01-l	0	8.62	0	0	0	0	0	0	25.72	1.19	1.12	63.35	2.81452	0.242612	0.723895	0.0334928	1.523	0.0181237	0.0170576	0.964819	1.36687	0.117824	0.0162657	0.86591
L173		Small Ba	2	sp_ge_160517_43a_010.0_823.1a_15_an09a-02-l	1.06	9.57	0	0	0	0	0	0	24.92	1.64	1.64	61.17	2.76778	0.264877	0.689732	0.0453916	1.55159	0.0254461	0.0254461	0.949108	1.3816	0.132219	0.0226582	0.845123
L174		Small Ba	2	sp_ge_160517_43a_010.0_823.1a_18_an11a-01-l	0	11.28	0	0	0	0	0	0	17.91	3.22	1.76	65.84	3.08547	0.348041	0.552607	0.0993521	1.41203	0.0454674	0.0248517	0.929681	1.24471	0.140403	0.0400797	0.819517
L175		Small Ba	2	sp_ge_160517_43a_010.0_823.1a_19_an12a-01-l	0.58	10.93	0	0	0	0	0	0	16.93	5.07	1.05	65.44	3.03674	0.331916	0.514121	0.153963	1.39743	0.0708496	0.014673	0.914477	1.2279	0.134209	0.0622544	0.803536
L176		Small Ba	2	sp_ge_160517_43a_010.0_823.1a_21_an13a-01-l	0.11	8.08	0	0	0	0	0	0	17.2	5.06	0	69.55	3.29598	0.266315	0.566908	0.166777	1.3403	0.0678193	0	0.932181	1.20934	0.0977144	0.0611924	0.841093
L177		Small Ba	2	sp_ge_160614_44a_010.0_827.1a_02_an02a-01-b	0	8.63	0	0	0	0	9.43	0	14.76	12.13	1.53	53.51	2.81532	0.242962	0.415541	0.341498	1.48876	0.180587	0.022778	0.796635	1.34644	0.116198	0.163323	0.720479
L186		Small Ba	2	sp_ge_160614_44a_010.0_827.1a_16_an07a-01-b	0	9.65	0	0	0	0	8.57	0	16.5	10.83	0	54.46	2.70416	0.260952	0.446187	0.292861	1.53163	0.165875	0	0.834125	1.3344	0.12877	0.144516	0.726715
L187		Small Ba	2	sp_ge_160614_44a_010.0_827.1a_16_an07a-02-b	0	9.81	0	0	0	0	8.36	0	17.01	9.4	0	55.42	2.76091	0.270845	0.46963	0.259525	1.54273	0.145017	0	0.854983	1.33994	0.131448	0.125955	0.742597
L188		Small Ba	2	sp_ge_160614_44a_010.0_827.1a_17_an08a-01-b	0	9.96	0	0	0	0	7.49	0	12.9	6	0	63.65	3.465	0.345114	0.446985	0.2079	1.43575	0.086145	0	0.913855	1.25612	0.12511	0.0753674	0.799523
L189		Small Ba	2	sp_ge_160614_44a_010.0_827.1a_17_an08a-02-b	0	10.11	0	0	0	0	9.74	0	12.58	6.28	0	61.3	3.45185	0.348982	0.434242	0.216776	1.47973	0.0929269	0	0.907073	1.28717	0.130133	0.0808341	0.789033
L190		Small Ba	2	sp_ge_160614_44a_010.0_827.1a_17_an08a-03-b	0	8.18	0	0	0	0	8.8	0	21.7	6.11	0	55.21	2.77855	0.227285	0.602945	0.169769	1.63079	0.0996412	0	0.900359	1.43885	0.117698	0.0879137	0.794388
L191		Small Ba	2	sp_ge_160614_44a_010.0_827.1a_18_an01a-01-b	0	9.26	0	0	0	0	7.79	0	14.1	12.98	0.32	55.54	2.75179	0.254816	0.388002	0.357182	1.45264	0.188553	0.00464846	0.806798	1.28568	0.119054	0.166881	0.714065
L192		Small Ba	2	sp_ge_160614_44a_010.0_827.1a_18_an01a-02-b	0	8.09	0	3.48	0	0	6.52	0	16.05	9.33	0.83	55.69	2.98775	0.241709	0.479534	0.278757	1.5186	0.141686	0.0126044	0.84571	1.3678	0.110655	0.127616	0.761729
L193		Small Ba	2	sp_ge_160712_45a_018.0_832.2a_01_an02a-01-b	0	11	0	0	0	0	2.99	0	10.98	11.48	0	63.55	2.98864	0.328751	0.328153	0.343096	1.3328	0.153005	0	0.846995	1.16239	0.127862	0.133442	0.738696
L194		Small Ba	2	sp_ge_160712_45a_018.0_832.2a_01_an02a-02-b	0	11.74	0	0	0	0	4.76	0	10.9	14.16	0	58.44	2.71739	0.319022	0.296196	0.384783	1.37741	0.195041	0	0.804959	1.18568	0.139198	0.167892	0.69291
L195		Small Ba	2	sp_ge_160712_45a_018.0_832.2a_01_an02a-03-b	0	8.64	0	0	0	0	4.12	0	12.57	9.9	0	64.77	3.2144	0.277724	0.40405	0.318226	1.33923	0.132583	0	0.867417	1.20034	0.103709	0.118833	0.777458
L196		Small Ba	2	sp_ge_160712_45a_018.0_832.2a_02_an01a-01-b	0	12.69	0	0	0	0	4.12	0	11.41	18.58	0	53.19	2.34302	0.297329	0.267338	0.435333	1.39334	0.258883	0	0.741117	1.18399	0.150249	0.219986	0.629766
L197		Small Ba	2	sp_ge_160712_45a_018.0_832.2a_02_an01a-02-b	0	11.32	0	0	0	0	4.77	0	12.86	8.5	0	62.55	3.05998	0.346389	0.393513	0.260098	1.40746	0.119634	0	0.880366	1.21403	0.137429	0.103193	0.759378
L200		Small Ba	2	sp_ge_160712_45a_018.0_834.1a_35_an02a-01-g	0.48	10.39	0	0	0	0	6.56	0	13.53	6.7	1.64	60.7	3.26584	0.339321	0.441868	0.218811	1.44844	0.0970452	0.0237543	0.8792	1.28551	0.133565	0.0861293	0.780306
L201		Small Ba	2	sp_ge_160712_45a_018.0_834.1a_39_an04a-01-g	0.76	9.48	0	0	0	0	2.93	0.29	16.02	5.66	1.01	63.85	3.20924	0.304236	0.514121	0.181643	1.41804	0.0802609	0.0143222	0.905417	1.26598	0.120015	0.0716546	0.80833
L202		Small Ba	2	sp_ge_160712_45a_018.0_834.1a_39_an04a-02-g	0.3	7.89	0	0	0	0	1.61	0.23	24.03	6.02	1.66	58.27	2.63574	0.20796	0.633368	0.158672	1.5163	0.0912813	0.0251706	0.883548	1.38543	0.10931	0.0834026	0.807287
L003	364	Tetraselmis	3	sp_ge_120710_01a_006.0_364.1a_15_an22a-01-b	0	0	0	0	0	0	0	0	85.86	8.55	5.59	0	1.05921	0	0.909438	0.0905624	7.07214	0.604668	0.395332	0	11.6959	0	1	0
L004	364	Tetraselmis	3	sp_ge_120710_01a_006.0_364.1a_20_an27a-01-b	0	0.22	0.87	0	0	0	0.88	1.48	93.66	1.09	1.8	0	1.05296	0.00231652	0.986206	0.0114773	34.6021	0.377163	0.622837	0	76.3359	0.167939	0.832061	0
L005	364	Tetraselmis	3	sp_ge_120710_01a_006.0_364.1a_20_an27a-02-b	0	0.32	1.13	0	0	0	0.5	1.36	89.91	1.12	5.67	0	1.09469	0.00350301	0.984236	0.0122605	14.7275	0.164948	0.835052	0	69.4444	0.222222	0.777778	0
L006	364	Tetraselmis	3	sp_ge_120710_01a_006.0_364.1a_20_an27a-03-b	0.41	0.41	1.06	0	0	0	1.09	1.91	88.22	1.68	5.23	0	1.1073	0.00453992	0.976857	0.0186026	14.4718	0.243126	0.756874	0	47.8469	0.196172	0.803828	0
L007	364	Tetraselmis	3	sp_ge_120710_01a_006.0_364.1a_21_an28a-02-b	0.2	0.93	0	0	0	0	1.15	0.92	90.42	1.95	4.43	0	1.07181	0.00996785	0.969132	0.0209003	15.674	0.305643	0.694357	0	34.7222	0.322917	0.677083	0
L008	364	Tetraselmis	3	sp_ge_120710_01a_006.0_364.1a_21_an28a-03-b	0	0.62	1.73	0	0	0	0.73	1.36	90.3	2.05	3.21	0	1.07562	0.00666882	0.971281	0.0220501	19.0114	0.389734	0.610266	0	37.4532	0.23221	0.76779	0
L009	364	Tetraselmis	3	sp_ge_120710_01a_006.0_364.2a_01_an01a-01-b	0	0.76	0	0	1.25	1.47	0.51	1.35	90.15	1.16	3.33	0.02	1.08613	0.00825459	0.979146	0.0125991	22.1729	0.257206	0.738359	0.00443459	51.5464	0.391753	0.597938	0.0103093
L010	365	Tetraselmis	3	sp_ge_120710_01a_006.0_365.1b_03_an07a-01-b	0.87	0	0	0	0	0	1.06	1.09	82.83	14.15	0	0	1.03114	0	0.854094	0.145906	7.06714	1	0	0	7.06714	0	1	0
L011	365	Tetraselmis	3	sp_ge_120710_01a_006.0_365.1b_03_an07a-03-b	0	0.8	0.55	0	0	0	0.88	1.11	83.74	12.92	0	0	1.02606	0.0082085	0.859224	0.132567	7.73994	1	0	0	7.28863	0.058309	0.941691	0
L012	365	Tetraselmis	3	sp_ge_120710_01a_006.0_365.1b_05_an10a-01-b	0	1.01	1.56	0	0	0	1.17	2.27	85.17	1.03	7.8	0	1.14666	0.0115812	0.976608	0.0118106	11.325	0.116648	0.883352	0	49.0196	0.495098	0.504902	0
L013	365	Tetraselmis	3	sp_ge_120710_01a_006.0_365.1b_05_an10a-03-b	0	1.3	0	0	0	0	1.52	1.69	81.79	2.84	10.86	0	1.16374	0.0151286	0.951821	0.0330502	7.29927	0.207299	0.792701	0	24.1546	0.31401	0.68599	0
L014	365	Tetraselmis	3	sp_ge_120710_01a_006.0_365.1b_07_an04a-01-b	0	0.59	0	0	0	0	0.84	1.42	86.59	3.09	7.47	0	1.10779	0.00653595	0.959233	0.0342306	9.4697	0.292614	0.707386	0	27.1739	0.160326	0.839674	0
L015	365	Tetraselmis	3	sp_ge_120710_01a_006.0_365.1b_07_an04a-02-b	0	0.4	0	0	0	0	0.5	1.19	88.79	2.49	6.63	0	1.09075	0.004363	0.968477	0.0271597	10.9649	0.273026	0.726974	0	34.6021	0.138408	0.861592	0
L016	365	Tetraselmis	3	sp_ge_120710_01a_006.0_365.2a_01_an01a-02-b	0	0	0	0	4.07	0.66	0.32	1.08	87.71	1.76	4.39	0	1.11769	0	0.980329	0.0196714	16.2602	0.286179	0.713821	0	56.8182	0	1	0
L017	365	Tetraselmis	3	sp_ge_120710_01a_006.0_365.2a_01_an01a-03-b	0	0	0	0	2.75	1.2	0.48	0.84	88.72	3.24	2.78	0	1.08743	0	0.964767	0.0352327	16.6113	0.538206	0.461794	0	30.8642	0	1	0
L018	365	Tetraselmis	3	sp_ge_120710_01a_006.0_365.2a_04_an05a-02-b	0	0	0	0	1.06	2.13	0.49	2.01	83.15	4.05	7.12	0	1.14679	0	0.953555	0.046445	8.95255	0.362578	0.637422	0	24.6914	0	1	0
L042	465	Tetraselmis	3	sp_ge_130806_11a_000.0_465.1a_23_an06a-01-b	0	0	0	0	0	0	0.48	1.07	88.43	1.82	8.2	0	1.10803	0	0.979834	0.0201662	9.98004	0.181637	0.818363	0	54.9451	0	1	0
L043	465	Tetraselmis	3	sp_ge_130806_11a_000.0_465.1a_23_an06a-02-b	0	0	0	0	0	0	0.32	1.18	86.09	1.02	11.39	0	1.14797	0	0.988291	0.0117093	8.05802	0.0821918	0.917808	0	98.0392	0	1	0
L044	466	Tetraselmis	3	sp_ge_130806_11b_002.5_466.1a_08_an04a-01-b	0	0.11	0	0	0	0	0	0.51	89.01	1.1	9.27	0	1.1084	0.00121924	0.986588	0.0121924	9.6432	0.106075	0.893925	0	82.6446	0.0909091	0.909091	0
L045	467	Tetraselmis	3	sp_ge_130806_11c_005.0_467.1a_01_an01a-01-b	0	0	0	0	0	0	0.31	0.92	90.99	1.53	6.25	0	1.08085	0	0.983463	0.016537	12.8535	0.196658	0.803342	0	65.3595	0	1	0
L046	467	Tetraselmis	3	sp_ge_130806_11c_005.0_467.1a_01_an01a-03-b	0	0	0	0	0	0	0	0	89.76	6.27	3.97	0	1.04134	0	0.934708	0.0652921	9.76562	0.612305	0.387695	0	15.949	0	1	0
L047	467	Tetraselmis	3	sp_ge_130806_11c_005.0_467.1a_01_an01a-04-b	0	0	0	0	0	0	0	1.03	90.57	2.01	6.39	0	1.08015	0	0.978289	0.021711	11.9048	0.239286	0.760714	0	49.7512	0	1	0
L048	457	Tetraselmis	3	sp_ge_130806_11e_010.0_457.1a_22_an04a-01-b	0	0.84	0	0	0	3.97	0	0	86.01	3.43	5.75	0	1.10767	0.00930439	0.952703	0.0379929	10.8932	0.373638	0.626362	0	23.4192	0.196721	0.803279	0
L049	457	Tetraselmis	3	sp_ge_130806_11e_010.0_457.1a_22_an04a-02-b	0	0	0	0	0	3.81	0	0	92.32	1.23	2.64	0	1.06895	0	0.986852	0.013148	25.8398	0.317829	0.682171	0	81.3008	0	1	0
L050	457	Tetraselmis	3	sp_ge_130806_11e_010.0_457.1a_22_an04a-03-b	0	0.96	0	0	0	5.27	0	0	88.22	2.72	2.83	0	1.08814	0.0104461	0.959956	0.0295974	18.018	0.49009	0.50991	0	27.1739	0.26087	0.73913	0
L053	457	Tetraselmis	3	sp_ge_130806_11e_010.0_457.1a_49_an13a-02-b	0	0	5.09	0	0	0	0	0	88.17	1.55	5.19	0	1.11458	0	0.982724	0.017276	14.8368	0.22997	0.77003	0	64.5161	0	1	0
L054	469	Tetraselmis	3	sp_ge_130806_11f_010.0_469.1a_16_an13a-01-b	0.35	1.13	0	0	0	0	0	1.32	91.45	1.47	4.27	0	1.06326	0.0120149	0.972355	0.01563	17.4216	0.256098	0.743902	0	38.4615	0.434615	0.565385	0
L055	469	Tetraselmis	3	sp_ge_130806_11f_010.0_469.1a_16_an13a-02-b	0.5	0.59	0	0	0	0	0	1.2	92.35	1.48	3.88	0	1.0591	0.00624868	0.978077	0.0156746	18.6567	0.276119	0.723881	0	48.3092	0.285024	0.714976	0
L058	459	Tetraselmis	3	sp_ge_130806_11i_027.0_459.2a_09_an04a-02-b	5.69	1	0	0	0	0	2.42	1.62	72.41	1	15.85	0	1.34391	0.0134391	0.973122	0.0134391	5.93472	0.0593472	0.940653	0	50	0.5	0.5	0
L056	469	Tetraselmis	3	sp_ge_130806_11f_010.0_469.1a_16_an13a-03-b	2.02	0.59	0	0	0	0	0	1.04	91.14	1.32	3.89	0	1.07469	0.00634068	0.979473	0.0141859	19.1939	0.253359	0.746641	0	52.356	0.308901	0.691099	0
L057	469	Tetraselmis	3	sp_ge_130806_11f_010.0_469.1a_16_an13a-04-b	1.14	0.14	0	0	0	0	0	1.41	92.62	2.35	2.34	0	1.05141	0.00147198	0.97382	0.0247082	21.322	0.501066	0.498934	0	40.1606	0.0562249	0.943775	0
L059	472	Tetraselmis	3	sp_ge_130806_11j_030.0_472.1a_25_an08a-01-b	0.52	0	0	0	0	0	0	1.05	89.02	1.83	7.58	0	1.10072	0	0.979857	0.0201431	10.627	0.194474	0.805526	0	54.6448	0	1	0
L060	472	Tetraselmis	3	sp_ge_130806_11j_030.0_472.1a_25_an08a-02-b	1.15	0.27	0	0	0	0	0	1.49	88.07	1.55	7.47	0	1.11247	0.00300367	0.979753	0.0172433	11.0865	0.17184	0.82816	0	54.9451	0.148352	0.851648	0
L061	472	Tetraselmis	3	sp_ge_130806_11j_030.0_472.1a_25_an08a-03-b	0	0.33	0	0	0	0	0	1.52	89.49	1.39	7.27	0	1.09637	0.00361802	0.981142	0.0152396	11.5473	0.160508	0.839492	0	58.1395	0.19186	0.80814	0
L062	472	Tetraselmis	3	sp_ge_130806_11j_030.0_472.1a_30_an12a-04-b	3.22	0	0	0	0	0	0	1.12	88.11	2.5	5.05	0	1.10363	0	0.972409	0.0275908	13.245	0.331126	0.668874	0	40	0	1	0
L063	472	Tetraselmis	3	sp_ge_130806_11j_030.0_472.1a_30_an12a-05-b	0.15	0.21	0	0	6.49	0	0	1.18	82.99	1.92	7.05	0	1.17481	0.00246711	0.974977	0.0225564	11.1483	0.214047	0.785953	0	46.9484	0.0985915	0.901408	0
L064	472	Tetraselmis	3	sp_ge_130806_11j_030.0_472.1a_30_an12a-06-b	0.29	0.51	0	0	0.76	0	0	1.31	87.82	1.37	7.96	0	1.11483	0.00568562	0.979041	0.0152731	10.7181	0.146838	0.853162	0	53.1915	0.271277	0.728723	0
L066	473	Tetraselmis	3	sp_ge_130806_11j_050.0_473.1a_08_an02a-03-b	0	0.66	0	0	0	0	0	0	86.83	2.31	10.2	0	1.11359	0.00734967	0.966927	0.0257238	7.99361	0.184652	0.815348	0	33.67	0.222222	0.777778	0
L067	473	Tetraselmis	3	sp_ge_130806_11j_050.0_473.1a_08_an02a-04-b	0	0	0	0	9.72	0	0	1.98	77.5	2.44	8.36	0	1.25094	0	0.969477	0.0305229	9.25926	0.225926	0.774074	0	40.9836	0	1	0
L068	473	Tetraselmis	3	sp_ge_130806_11j_050.0_473.1a_08_an02a-05-b	0	0	0	0	0	0	0	0	88.9	1.97	9.13	0	1.10047	0	0.978321	0.0216793	9.00901	0.177477	0.822523	0	50.7614	0	1	0
L069	473	Tetraselmis	3	sp_ge_130806_11j_050.0_473.2a_03_an03a-01-b	4.18	1.31	0.93	0	0.25	0	4.76	1.38	76.88	1.68	8.64	0	1.25203	0.0164017	0.962564	0.0210342	9.68992	0.162791	0.837209	0	33.4448	0.438127	0.561873	0
L070	473	Tetraselmis	3	sp_ge_130806_11j_050.0_473.2a_03_an03a-02-b	5.96	1.64	0.63	0	8.49	0	3.13	2.03	69.95	1.04	7.13	0	1.37684	0.0225802	0.963101	0.0143192	12.2399	0.127295	0.872705	0	37.3134	0.61194	0.38806	0
L071	473	Tetraselmis	3	sp_ge_130806_11j_050.0_473.2a_03_an03a-03-b	4.32	1.35	0.65	0	6.46	0	2.7	2.23	74.44	1.01	6.85	0	1.30208	0.0175781	0.969271	0.013151	12.7226	0.128499	0.871501	0	42.3729	0.572034	0.427966	0
L074	480	Tetraselmis	3	sp_ge_131001_13a_002.5_480.1a_25_an03a-01-b	0	0	0	0	0	0	0	0	92.15	2.62	5.23	0	1.05519	0	0.972354	0.0276459	12.7389	0.333758	0.666242	0	38.1679	0	1	0
L075	480	Tetraselmis	3	sp_ge_131001_13a_002.5_480.1a_25_an03a-02-b	0	0	0	0	0	0	5.54	0	79.79	1.78	12.89	0	1.22594	0	0.978178	0.0218217	6.81663	0.121336	0.878664	0	56.1798	0	1	0
L076	480	Tetraselmis	3	sp_ge_131001_13a_002.5_480.1a_25_an03a-03-b	0	0	0	0	0	0	0	0	90.43	5.38	4.18	0	1.04373	0	0.943847	0.0561528	10.4603	0.562762	0.437238	0	18.5874	0	1	0
L077	480	Tetraselmis	3	sp_ge_131001_13a_002.5_480.1a_25_an03a-04-b	0	1.08	0	0	0	0	0	1.05	92.12	1.21	4.53	0	1.05921	0.0114395	0.975744	0.0128164	17.4216	0.210801	0.789199	0	43.6681	0.471616	0.528384	0
L078	480	Tetraselmis	3	sp_ge_131001_13a_002.5_480.1a_25_an03a-05-b	0	0	0	0	0	0	0	0.67	94.69	1.67	2.98	0	1.03778	0	0.982669	0.0173308	21.5054	0.35914	0.64086	0	59.8802	0	1	0
L081	483	Tetraselmis	3	sp_ge_131105_14a_002.0_483.1a_06_an04a-01-b	0	0	0.88	0	15.68	0	1.56	1.46	76.06	2.2	2.16	0	1.27779	0	0.971889	0.0281114	22.9358	0.504587	0.495413	0	45.4545	0	1	0
L082	483	Tetraselmis	3	sp_ge_131105_14a_002.0_483.1a_06_an04a-02-b	0.98	0	1.44	4.87	12.32	0	1.65	1.71	72.9	1.88	2.23	0	1.33726	0	0.97486	0.0251404	24.3309	0.457421	0.542579	0	53.1915	0	1	0
L083	483	Tetraselmis	3	sp_ge_131105_14a_002.0_483.1a_06_an04a-03-b	1.16	0.68	0	0	11.79	0	1.13	2.02	79	2.14	2.07	0	1.2222	0.00831093	0.965534	0.026155	23.753	0.508314	0.491686	0	35.461	0.241135	0.758865	0
L084	483	Tetraselmis	3	sp_ge_131105_14a_002.0_483.1a_07_an05a-01-b	1.44	0.91	1.02	2.31	2.14	0	1.33	1.81	85.81	1.52	1.71	0	1.13327	0.0103128	0.972461	0.0172257	30.9598	0.470588	0.529412	0	41.1523	0.374486	0.625514	0
L085	483	Tetraselmis	3	sp_ge_131105_14a_002.0_483.1a_07_an05a-02-b	3.19	0.96	1.51	2.82	7.02	0	1.79	3.33	76.14	1.61	1.64	0	1.27049	0.0121967	0.967348	0.0204548	30.7692	0.495385	0.504615	0	38.9105	0.373541	0.626459	0
L086	490	Tetraselmis	3	sp_ge_131203_15a_002.5_490.1a_19_an04a-01-b	0	0	0	0	6.25	0	0	2.07	89.39	1.56	0.74	0	1.09951	0	0.982848	0.0171523	43.4783	0.678261	0.321739	0	64.1026	0	1	0
L087	490	Tetraselmis	3	sp_ge_131203_15a_002.5_490.1a_19_an04a-02-b	1.13	0	1.3	8.15	3.98	0	0	1.23	81.66	1.39	1.16	0	1.20409	0	0.983263	0.0167369	39.2157	0.545098	0.454902	0	71.9424	0	1	0
L088	490	Tetraselmis	3	sp_ge_131203_15a_002.5_490.1a_19_an04a-03-b	1.68	0	2.24	5.56	2.05	0	0	0.98	85.29	1.17	1.01	0	1.1566	0	0.986468	0.0135323	45.8716	0.536697	0.463303	0	85.4701	0	1	0
L089	490	Tetraselmis	3	sp_ge_131203_15a_002.5_490.1a_19_an04a-04-b	2.3	0.35	0	0	3.37	0	0	1.78	90	1.69	0.52	0	1.08648	0.00380269	0.977836	0.0183616	45.2489	0.764706	0.235294	0	49.0196	0.171569	0.828431	0
L090	620	Tetraselmis	3	sp_ge_141104_24b_010.0_620.4b_06_an03a-01-g	0	0	0	0	0.39	2.85	0	1.12	89.14	3.85	2.64	0	1.07538	0	0.958598	0.0414023	15.4083	0.59322	0.40678	0	25.974	0	1	0
L091	620	Tetraselmis	3	sp_ge_141104_24b_010.0_620.4b_06_an03a-02-g	0	0	0	0	0	1.91	0	1.33	90.71	3.26	2.79	0	1.06417	0	0.965308	0.0346919	16.5289	0.538843	0.461157	0	30.6748	0	1	0
L092	620	Tetraselmis	3	sp_ge_141104_24b_010.0_620.4b_06_an03a-03-g	0	0	0	0	0	3.55	0	1.18	86.28	6.24	2.74	0	1.08085	0	0.932555	0.0674449	11.1359	0.694878	0.305122	0	16.0256	0	1	0
L149	201	Tetraselmis	3	sp_ge_150519_34a_018.0_703.1a_13_an09b-01-b	0	1.67	0	0	0	0	0	1.78	94.61	1.39	0.56	0	1.02386	0.0170984	0.96867	0.0142316	51.2821	0.712821	0.287179	0	32.6797	0.545752	0.454248	0
L150		Tetraselmis	3	sp_ge_151103_39a_010.0_781.1a_24_an12a-01-l	0	1.2	0	0	0	0	0	0	93.29	1.78	3.74	0	1.03875	0.0124649	0.969045	0.0184897	18.1159	0.322464	0.677536	0	33.557	0.402685	0.597315	0
L150		Tetraselmis	3	sp_ge_180612_60a_011.0_904.1a_03_an01a-01-g	0	2.12	0	0	8.19	0	0	0	80.83	2.52	6.34	0	1.17	0.024804	0.945712	0.029484	11.2867	0.284424	0.715576	0	21.5517	0.456897	0.543103	0
L151		Tetraselmis	3	sp_ge_180612_60a_011.0_904.1a_03_an01a-02-g	0	0.31	0	0	0	0	0	0	90.58	4.44	4.67	0	1.04899	0.00325186	0.950173	0.0465751	10.9769	0.487377	0.512623	0	21.0526	0.0652632	0.934737	0
L152		Tetraselmis	3	sp_ge_151103_39a_010.0_781.1a_33_an17a-01-l	0	0	0	0	2.34	0	0	0	88.87	2.36	6.43	0	1.09613	0	0.974131	0.0258687	11.3766	0.268487	0.731513	0	42.3729	0	1	0
L154		Tetraselmis	3	sp_ge_151103_39a_010.0_781.1a_36_an20a-01-l	0	0	0	0	0	0	0	0	94.61	1.53	3.86	0	1.04015	0	0.984086	0.0159143	18.5529	0.283859	0.716141	0	65.3595	0	1	0
L204		Tetraselmis	3	sp_ge_160809_46a_013.0_836.1a_01_an01a-01-b	0	0.27	0	0	0	0	0	1.33	91.1	2.05	5.26	0	1.07043	0.00289017	0.975166	0.0219439	13.6799	0.280438	0.719562	0	43.1034	0.116379	0.883621	0
L205		Tetraselmis	3	sp_ge_160809_46a_013.0_836.1a_01_an01a-02-b	0	0.58	0	0	0	0	0	1.55	85.65	1.08	11.14	0	1.14534	0.006643	0.980987	0.0123697	8.18331	0.0883797	0.91162	0	60.241	0.349398	0.650602	0
L206		Tetraselmis	3	sp_ge_160809_46a_013.0_836.1a_02_an02a-03-b	0	2.27	0	0	7.44	0	0	3.21	80.98	1.56	4.55	0	1.17911	0.0267657	0.95484	0.0183941	16.3666	0.255319	0.744681	0	26.1097	0.592689	0.407311	0
L207		Tetraselmis	3	sp_ge_160809_46a_013.0_836.1a_03_an03a-02-b	0	0.51	0	0	0	0	0	1.9	88.36	1.6	7.63	0	1.10534	0.00563723	0.976677	0.0176854	10.8342	0.173348	0.826652	0	47.3934	0.241706	0.758294	0
T001		Titi	4	ti01_10_an1-1	4.2	0	0	0	0	0	6.3	1.6	71.2	11.2	5.5	0	1.21359	0	0.864078	0.135922	5.98802	0.670659	0.329341	0	8.92857	0	1	0
T002		Titi	4	ti01_10_an1-2	4.1	3.3	0	0	0	0	6.8	1.3	68.6	9.7	6.1	0	1.22549	0.0404412	0.840686	0.118873	6.32911	0.613924	0.386076	0	7.69231	0.253846	0.746154	0
T003		Titi	4	ti01_10_an1-6	7.2	4.3	0	0	0	0	12	0	65.3	5.5	5.7	0	1.33156	0.057257	0.869507	0.0732357	8.92857	0.491071	0.508929	0	10.2041	0.438776	0.561224	0
T004		Titi	4	ti01_15_an3-1	22.8	2.2	0	0	0	0	19.9	1.2	43.4	8	2.5	0	1.86567	0.0410448	0.809701	0.149254	9.52381	0.761905	0.238095	0	9.80392	0.215686	0.784314	0
T005		Titi	4	ti01_15_an3-2	26.5	2.1	0	0	0	0	29.1	0.8	32.8	6.8	1.8	0	2.39808	0.0503597	0.786571	0.16307	11.6279	0.790698	0.209302	0	11.236	0.235955	0.764045	0
T006		Titi	4	ti01_15_an3-7	27	3.4	0	0	0	0	28.3	1.4	32.2	5.4	2.3	0	2.43902	0.0829268	0.785366	0.131707	12.987	0.701299	0.298701	0	11.3636	0.386364	0.613636	0
T007		Titi	4	ti01_15_an3-8	13	4.3	0	0	0	0	13.9	2.1	55.3	8	3.4	0	1.47929	0.0636095	0.818047	0.118343	8.77193	0.701754	0.298246	0	8.13008	0.349593	0.650407	0
T008		Titi	4	ti02_10_an2-1	3	0.2	0	0	0	0	5	0	71.3	13.8	6.7	0	1.17233	0.00234467	0.835873	0.161782	4.87805	0.673171	0.326829	0	7.14286	0.0142857	0.985714	0
T009		Titi	4	ti02_10_an2-2	3.5	0.5	0	0	0	0	4.2	1.1	76.7	7.9	5.9	0	1.17509	0.00587544	0.901293	0.092832	7.24638	0.572464	0.427536	0	11.9048	0.0595238	0.940476	0
T010		Titi	4	ti02_10_an2-3	2.8	0.2	0	0	0	0	6	1.6	70.2	13.4	5.8	0	1.19332	0.00238663	0.837709	0.159905	5.20833	0.697917	0.302083	0	7.35294	0.0147059	0.985294	0
T011		Titi	4	ti02_10_an2-4	2.6	0.1	0	0	0	0	4.5	0.99	73.6	13.8	4.4	0	1.14286	0.00114286	0.841143	0.157714	5.49451	0.758242	0.241758	0	7.19424	0.00719424	0.992806	0
T012		Titi	4	ti02_10_an2-5	6.4	2.2	0	0	0	0	9.8	3	61.5	9.6	7.5	0	1.36426	0.0300136	0.839018	0.130969	5.84795	0.561404	0.438596	0	8.47458	0.186441	0.813559	0
T013		Titi	4	ti02_10_an2-7	7.9	2.3	0	0	0	0	11.1	3	60.1	8.8	6.8	0	1.40449	0.0323034	0.844101	0.123596	6.41026	0.564103	0.435897	0	9.00901	0.207207	0.792793	0
T014		Titi	4	ti02_13_an4-1	4.1	0.3	0	0	0	0	7.2	1.4	65.2	15.8	6	0	1.23001	0.00369004	0.801968	0.194342	4.58716	0.724771	0.275229	0	6.21118	0.0186335	0.981366	0
T015		Titi	4	ti02_13_an4-2	2.5	0.1	0	0	0	0	5.6	0.6	68.7	17.5	5.1	0	1.15875	0.00115875	0.79606	0.202781	4.42478	0.774336	0.225664	0	5.68182	0.00568182	0.994318	0
T016		Titi	4	ti02_13_an4-3	4.6	0.8	0	0	0	0	6.4	0.8	69.3	12	6.1	0	1.21803	0.00974421	0.844093	0.146163	5.52486	0.662983	0.337017	0	7.8125	0.0625	0.9375	0
T017		Titi	4	ti02_13_an4-4	4	1.9	0	0	0	0	9.7	0.99	69.8	6.4	7.2	0	1.28041	0.0243278	0.893726	0.0819462	7.35294	0.470588	0.529412	0	12.0482	0.228916	0.771084	0
T018		Titi	4	ti02_13_an4-5	6.1	2.1	0	0	0	0	8.2	1.6	66.8	8.2	6.9	0	1.29702	0.0272374	0.866407	0.106355	6.62252	0.543046	0.456954	0	9.70874	0.203883	0.796117	0
T019		Titi	4	ti02_13_an4-7	8.9	3.5	0	0	2.2	0	15.1	2.5	51.3	7.2	9.2	0	1.6129	0.0564516	0.827419	0.116129	6.09756	0.439024	0.560976	0	9.34579	0.327103	0.672897	0
T020		Titi	4	ti02b_ref-1	4.3	0	0	0	0	0	8.6	2.1	62.2	19.6	3.2	0	1.22249	0	0.760391	0.239609	4.38596	0.859649	0.140351	0	5.10204	0	1	0
T021		Titi	4	ti02b_ref-2	4.8	0	0	0	0	0	9.3	2	66.2	13.9	3.8	0	1.24844	0	0.826467	0.173533	5.64972	0.785311	0.214689	0	7.19424	0	1	0
T022		Titi	4	ti02c_ref-2	4.1	0.4	0	0	0	0	7.8	2.4	68.8	8.5	7.9	0	1.287	0.00514801	0.885457	0.109395	6.09756	0.518293	0.481707	0	11.236	0.0449438	0.955056	0
T023		Titi	4	ti03_02_an1-1	1.2	0	0	0	0	0	4.3	1.1	75.4	11.6	6.4	0	1.14943	0	0.866667	0.133333	5.55556	0.644444	0.355556	0	8.62069	0	1	0
T024		Titi	4	ti03_02_an1-2	1.4	0	0	0	0	0	5.5	1.4	69.3	14.1	8.3	0	1.19904	0	0.830935	0.169065	4.46429	0.629464	0.370536	0	7.0922	0	1	0
T025		Titi	4	ti03_02_an1-3	1.9	0.5	0	0	0	0	4.6	1.1	72.9	12.1	6.9	0	1.16959	0.00584795	0.852632	0.14152	5.26316	0.636842	0.363158	0	7.93651	0.0396825	0.960317	0
T026		Titi	4	ti03_02_an1-4	1.9	0.99	0	0	0	0	4.6	1.8	72.7	9.7	8.3	0	1.19918	0.0118719	0.871807	0.116321	5.55556	0.538889	0.461111	0	9.35454	0.0926099	0.90739	0
T027		Titi	4	ti03_02_an1-5	1.2	0.2	0	0	0	0	3.8	0.9	74.1	13.1	6.6	0	1.14416	0.00228833	0.847826	0.149886	5.07614	0.664975	0.335025	0	7.5188	0.0150376	0.984962	0
T028		Titi	4	ti03_02_an1-6	10	8	0	0	7	0	16.1	6.5	26.7	3.2	22.5	0	2.63852	0.211082	0.704485	0.0844327	3.89105	0.124514	0.875486	0	8.92857	0.714286	0.285714	0
T029		Titi	4	ti03_02_an2-1	0	0	0	0	0	0	0	0	80	17.1	2.9	0	1.02987	0	0.823893	0.176107	5	0.855	0.145	0	5.84795	0	1	0
T030		Titi	4	ti03_02_an2-2	0	0	0	0	0	0	2.2	0	82.4	12.1	3.3	0	1.0582	0	0.871958	0.128042	6.49351	0.785714	0.214286	0	8.26446	0	1	0
T031		Titi	4	ti03_02_an2-3	1.1	0	4.7	4.7	0	0	2.3	0	72.7	12.9	1.6	0	1.16822	0	0.849299	0.150701	6.89655	0.889655	0.110345	0	7.75194	0	1	0
T032		Titi	4	ti03_02_an2-4	1.7	0	0	0	0	0	2.2	0	80.4	13.1	2.7	0	1.06952	0	0.859893	0.140107	6.32911	0.829114	0.170886	0	7.63359	0	1	0
T033		Titi	4	ti03_02_an2-5	0	0	0	0	0	0	0	0	89	8.9	2.1	0	1.02145	0	0.909091	0.0909091	9.09091	0.809091	0.190909	0	11.236	0	1	0
T034		Titi	4	ti03_02_an2-6	3.3	0	0	0	0	0	5.8	0	70.7	17.4	2.8	0	1.13507	0	0.802497	0.197503	4.9505	0.861386	0.138614	0	5.74713	0	1	0
L024	420	MgAs	5	sp_ge_130621_09a_015.0_420.1a_01_an01a-01-b	0	4.36	0	10.3	0	0	0	0	80.53	4.81	0	0	1.11483	0.0486065	0.89777	0.0536232	20.79	1	0	0	10.9051	0.475463	0.524537	0
L025	420	MgAs	5	sp_ge_130621_09a_015.0_420.1a_01_an01a-03-b	0	4.2	0	4.45	0	0	1.45	0.03	88.08	1.79	0	0	1.06304	0.0446476	0.936324	0.0190284	55.8659	1	0	0	16.6945	0.701169	0.298831	0
L026	420	MgAs	5	sp_ge_130621_09a_015.0_420.1a_01_an01a-04-b	0	5.06	2.49	25.9	0	0	0.84	0	59.46	6.25	0	0	1.41303	0.0714992	0.840187	0.0883143	16	1	0	0	8.84173	0.447392	0.552608	0
L027	420	MgAs	5	sp_ge_130621_09a_015.0_420.1a_01_an01a-05-b	0	4.85	2.37	3.79	0	0	1.84	0.59	83.12	3.45	0	0	1.09385	0.0530518	0.90921	0.0377379	28.9855	1	0	0	12.0482	0.584337	0.415663	0
L028	420	MgAs	5	sp_ge_130621_09a_015.0_420.1a_05_an05a-01-b	0	0	0	6.53	0	0	0	0	77.23	16.24	0	0	1.06986	0	0.826254	0.173746	6.15764	1	0	0	6.15764	0	1	0
L029	420	MgAs	5	sp_ge_130621_09a_015.0_420.1a_05_an05a-02-b	0	0	0	9.62	0	0	1.15	0	83.28	5.94	0	0	1.12082	0	0.933423	0.066577	16.835	1	0	0	16.835	0	1	0
L030	420	MgAs	5	sp_ge_130621_09a_015.0_420.1a_07_an07a-01-b	0	3.64	1.94	13.25	0	0	0.89	0	79.16	1.11	0	0	1.19175	0.0433798	0.943392	0.0132285	90.0901	1	0	0	21.0526	0.766316	0.233684	0
L031	420	MgAs	5	sp_ge_130621_09a_015.0_420.1a_07_an07a-02-b	0	3.42	3.32	12	0	0	0	0	79.83	1.43	0	0	1.18092	0.0403873	0.942726	0.0168871	69.9301	1	0	0	20.6186	0.705155	0.294845	0
L032	420	MgAs	5	sp_ge_130621_09a_015.0_420.2a_03_an03a-01-b	2.15	8.39	2.23	0	0	0	0	0.82	84.93	1.48	0	0	1.05485	0.0885021	0.895886	0.0156118	67.5676	1	0	0	10.1317	0.850051	0.149949	0
L033	420	MgAs	5	sp_ge_130621_09a_015.0_420.2a_03_an03a-02-b	7.22	6.03	2.08	0	0	0	0	0.38	80.96	3.33	0	0	1.10717	0.0667626	0.896368	0.0368689	30.03	1	0	0	10.6838	0.644231	0.355769	0
L035	420	MgAs	5	sp_ge_130621_09a_015.0_420.2a_09_an07a-01-b	5.98	4.95	0	0.89	0	0	0	0	85.56	2.61	0	0	1.07388	0.0531572	0.918814	0.0280284	38.3142	1	0	0	13.2275	0.654762	0.345238	0
L036	420	MgAs	5	sp_ge_130621_09a_015.0_420.2a_09_an07a-02-b	3.65	4.67	0	1.84	0	0	0	0	85.11	4.72	0	0	1.0582	0.049418	0.900635	0.0499471	21.1864	1	0	0	10.6496	0.497338	0.502662	0
L037	420	MgAs	5	sp_ge_130621_09a_015.0_420.2a_09_an07a-03-b	4.21	6.01	0	1.08	0	0	0	0	80.82	7.88	0	0	1.05585	0.0634569	0.853342	0.0832014	12.6904	1	0	0	7.19942	0.432685	0.567315	0
L038	420	MgAs	5	sp_ge_130621_09a_015.0_420.2a_09_an07a-04-b	2.87	5.13	0	3.89	0	0	0	0	82.77	5.35	0	0	1.07239	0.0550134	0.887614	0.0573727	18.6916	1	0	0	9.54198	0.489504	0.510496	0
L039	420	MgAs	5	sp_ge_130621_09a_015.0_420.2a_10_an08a-01-b	3.49	5.4	1.95	2.43	0	0	0	0	84.89	1.84	0	0	1.08542	0.0586128	0.921415	0.0199718	54.3478	1	0	0	13.8122	0.745856	0.254144	0
L040	420	MgAs	5	sp_ge_130621_09a_015.0_420.2a_10_an08a-02-b	0.67	4.27	2.77	3.27	0	0	0	0	86.07	2.96	0	0	1.07181	0.0457663	0.922508	0.0317256	33.7838	1	0	0	13.8313	0.590595	0.409405	0
L041	420	MgAs	5	sp_ge_130621_09a_015.0_420.2a_10_an08a-03-b	1.45	3.41	2.11	6.7	0	0	0	0	76.01	10.32	0	0	1.11433	0.0379987	0.847002	0.114999	9.68992	1	0	0	7.28332	0.248361	0.751639	0
L099	673	MgAs	5	sp_ge_150324_31b_034.0_673.1a_02_an02a-01-b	5.16	6.09	2.41	0	0	0	0	0.29	84.24	1.81	0	0	1.0853	0.0660951	0.914261	0.019644	55.2486	1	0	0	12.6582	0.770886	0.229114	0
L100	673	MgAs	5	sp_ge_150324_31b_034.0_673.1a_02_an02a-02-b	4.12	6.68	0	0	0	0	0	0.19	87.47	1.53	0	0	1.04515	0.0698161	0.914193	0.0159908	65.3595	1	0	0	12.1803	0.813642	0.186358	0
L101	673	MgAs	5	sp_ge_150324_31b_034.0_673.1a_02_an02a-03-b	5.06	6.4	0	0	0	0	0	0.19	86.77	1.59	0	0	1.0553	0.067539	0.915682	0.0167792	62.8931	1	0	0	12.5156	0.801001	0.198999	0
L102	673	MgAs	5	sp_ge_150324_31b_034.0_673.1a_03_an03a-01-b	4	12.25	0	6.6	0	0	0	0	68.41	7.69	1.05	0	1.13186	0.138653	0.774307	0.0870402	11.4416	0.879863	0.120137	0	5.01505	0.614343	0.385657	0
L103	673	MgAs	5	sp_ge_150324_31b_034.0_673.1a_03_an03a-02-b	2.52	9.32	0	5.86	0	0	0	0	71.74	10.49	0.07	0	1.0923	0.101802	0.783616	0.114582	9.4697	0.993371	0.00662879	0	5.04796	0.470469	0.529531	0
L106	673	MgAs	5	sp_ge_150324_31b_034.0_673.1a_06_an06a-01-b	3.33	5.8	2.97	1.48	0	0	0.75	0	81.55	3.94	0.03	0.14	1.09541	0.0635338	0.893307	0.0431592	24.3309	0.958637	0.00729927	0.0340633	10.1215	0.587045	0.398785	0.01417
L107	673	MgAs	5	sp_ge_150324_31b_034.0_673.1a_06_an06a-02-b	8.57	7.95	1.6	0.4	0	0	1.29	0	75.15	5.04	0	0	1.13456	0.0901974	0.852621	0.0571818	19.8413	1	0	0	7.69823	0.612009	0.387991	0
L108	673	MgAs	5	sp_ge_150324_31b_034.0_673.1a_09_an08a-01-b	8.93	3.66	1.19	0.55	2.38	0	0	0	81.24	1.73	0.32	0	1.15433	0.0422486	0.937781	0.01997	48.7805	0.843902	0.156098	0	18.5529	0.679035	0.320965	0
L109	673	MgAs	5	sp_ge_150324_31b_034.0_673.1a_09_an08a-02-b	7.84	7.79	1.72	0.65	0	0	0	0	79.13	2.43	0.44	0	1.11919	0.0871852	0.885618	0.0271964	34.8432	0.84669	0.15331	0	9.78474	0.762231	0.237769	0
L110	673	MgAs	5	sp_ge_150324_31b_034.0_673.1a_10_an09a-01-b	4.97	5.75	1.06	1.25	0	0	0	0	80.52	5.54	0.9	0	1.08921	0.0626293	0.877029	0.060342	15.528	0.860248	0.139752	0	8.8574	0.5093	0.4907	0
L111	673	MgAs	5	sp_ge_150324_31b_034.0_673.1a_10_an09a-02-b	3.62	6.37	1.54	0.35	0	0	0	0	79.19	8.18	0.74	0	1.06678	0.0679539	0.844783	0.0872626	11.2108	0.91704	0.0829596	0	6.87285	0.437801	0.562199	0
L112	673	MgAs	5	sp_ge_150324_31b_034.0_673.1a_13_an11a-01-b	2.52	5.36	1.3	1.33	0	0	0	0	83.94	5.23	0.32	0	1.05787	0.0567016	0.887972	0.0553264	18.018	0.942342	0.0576577	0	9.44287	0.506138	0.493862	0
L113	673	MgAs	5	sp_ge_150324_31b_034.0_673.1a_13_an11a-02-b	6.2	6.55	1.14	1.85	0	0	0	0	81.91	1.58	0.77	0	1.11062	0.0727454	0.909707	0.0175478	42.5532	0.67234	0.32766	0	12.3001	0.805658	0.194342	0
L116	198	MgAs	5	sp_ge_150511_33a_010.0_697.1a_01_an01a-03-b	0	5.74	0	1.2	0	0	0	0	90.38	2.68	0	0	1.01215	0.0580972	0.914777	0.0271255	37.3134	1	0	0	11.8765	0.68171	0.31829	0
L119	198	MgAs	5	sp_ge_150511_33a_010.0_697.1a_07_an06a-01-b	0	6.85	0	3.53	0	0	2.71	0	74.53	12.37	0	0	1.06667	0.0730667	0.794987	0.131947	8.08407	1	0	0	5.20291	0.3564	0.6436	0
L120	198	MgAs	5	sp_ge_150511_33a_010.0_697.1a_07_an06a-02-b	0	4.33	0	3.7	0	0	2.64	0	82.04	7.3	0	0	1.06758	0.0462261	0.875841	0.0779332	13.6986	1	0	0	8.59845	0.372313	0.627687	0
L123	198	MgAs	5	sp_ge_150511_33a_010.0_697.1a_10_an09a-02-b	0	5.25	0	5.26	0	0	3.43	0	82.67	3.38	0	0	1.09529	0.0575027	0.905476	0.0370208	29.5858	1	0	0	11.5875	0.608343	0.391657	0
L125	198	MgAs	5	sp_ge_150511_33a_010.0_697.1a_12_an10a-03-b	0	5.58	0	1.42	0	0	2.98	0	83.69	6.33	0	0	1.04603	0.0583682	0.875418	0.0662134	15.7978	1	0	0	8.39631	0.468514	0.531486	0
L125	847	MgAs	5	sp_ge_170321_48a_006.0_847.1a_02_an02a-02-b	0	0	0	0	0	0	0	0	90.6	9.4	0	0	1	0	0.906	0.094	10.6383	1	0	0	10.6383	0	1	0
L126	847	MgAs	5	sp_ge_170321_48a_006.0_847.1a_04_an03a-01-b	0	8.41	0	4.58	0	0	0	0	80.23	6.78	0	0	1.048	0.0881367	0.840809	0.0710543	14.7493	1	0	0	6.58328	0.553654	0.446346	0
L126	198	MgAs	5	sp_ge_150511_33a_010.0_697.1a_12_an10a-04-b	0	6.15	0	0.37	0	0	3.04	0	79.54	10.9	0	0	1.0353	0.0636712	0.823481	0.112848	9.17431	1	0	0	5.8651	0.360704	0.639296	0
L127	198	MgAs	5	sp_ge_150511_33a_010.0_697.1a_12_an10a-05-b	0	3.35	0	0	0	0	2.76	0	85.3	8.59	0	0	1.02838	0.0344508	0.877211	0.0883381	11.6414	1	0	0	8.37521	0.28057	0.71943	0
L127	847	MgAs	5	sp_ge_170321_48a_006.0_847.1a_04_an03a-02-b	0	7.8	0	0	0	0	0	0	83.94	8.26	0	0	1	0.078	0.8394	0.0826	12.1065	1	0	0	6.22665	0.485679	0.514321	0
L128	847	MgAs	5	sp_ge_170321_48a_006.0_847.1a_04_an03a-03-b	0	3.82	0	0	0	0	0	0	91.67	4.51	0	0	1	0.0382	0.9167	0.0451	22.1729	1	0	0	12.0048	0.458583	0.541417	0
L129	847	MgAs	5	sp_ge_170321_48a_006.0_847.1a_06_an04a-01-b	0	0	0	0	0	0	0	0	89.78	10.22	0	0	1	0	0.8978	0.1022	9.78474	1	0	0	9.78474	0	1	0
L130	847	MgAs	5	sp_ge_170321_48a_006.0_847.1a_06_an04a-02-b	0	0	0	0	0	0	0	0	91.84	8.16	0	0	1	0	0.9184	0.0816	12.2549	1	0	0	12.2549	0	1	0
L130	201	MgAs	5	sp_ge_150519_34a_018.0_703.1a_03_an03a-01-b	0	1.63	0	1.52	0	0	0	0	88.46	8.4	0	0	1.01533	0.0165499	0.898162	0.0852878	11.9048	1	0	0	9.97009	0.162512	0.837488	0
L131	847	MgAs	5	sp_ge_170321_48a_006.0_847.1a_07_an05a-01-b	0	10.08	0	0	0	0	0	0	82.41	7.51	0	0	1	0.1008	0.8241	0.0751	13.3156	1	0	0	5.68505	0.573053	0.426947	0
L131	201	MgAs	5	sp_ge_150519_34a_018.0_703.1a_03_an03a-02-b	0	1.52	0	3.71	0	0	0	0	84.18	10.59	0	0	1.03853	0.0157856	0.874234	0.10998	9.44287	1	0	0	8.25764	0.125516	0.874484	0
L132	847	MgAs	5	sp_ge_170321_48a_006.0_847.1a_07_an05a-02-b	5.37	0	0	0	0	0	0	0	81.74	12.89	0	0	1.05675	0	0.863785	0.136215	7.75795	1	0	0	7.75795	0	1	0
L132	201	MgAs	5	sp_ge_150519_34a_018.0_703.1a_03_an04a-01-b	0	0	2.42	1.27	0	0	0	0	74.92	21.38	0	0	1.03842	0	0.777985	0.222015	4.67727	1	0	0	4.67727	0	1	0
L133	847	MgAs	5	sp_ge_170321_48a_006.0_847.1a_09_an06a-01-b	6.02	0	0	0	0	0	0	0	86.52	7.47	0	0	1.06394	0	0.920523	0.0794765	13.3869	1	0	0	13.3869	0	1	0
L133	201	MgAs	5	sp_ge_150519_34a_018.0_703.1a_03_an04a-02-b	0	0	0	2.41	0	0	0	0	94.06	3.53	0	0	1.0247	0	0.963828	0.0361717	28.3286	1	0	0	28.3286	0	1	0
L134	847	MgAs	5	sp_ge_170321_48a_006.0_847.1a_09_an06a-02-b	0	0	0	0	0	0	0	0	84.25	15.75	0	0	1	0	0.8425	0.1575	6.34921	1	0	0	6.34921	0	1	0
L134	201	MgAs	5	sp_ge_150519_34a_018.0_703.1a_03_an04a-03-b	0	0	2.31	1.36	0	0	0	0	90.8	5.53	0	0	1.0381	0	0.942593	0.0574068	18.0832	1	0	0	18.0832	0	1	0
L135	847	MgAs	5	sp_ge_170321_48a_006.0_847.1a_10_an07a-01-b	0	0	0	0	0	0	0	0	86.52	13.48	0	0	1	0	0.8652	0.1348	7.4184	1	0	0	7.4184	0	1	0
L135	201	MgAs	5	sp_ge_150519_34a_018.0_703.1a_03_an04a-04-b	0	0	3.88	9.87	0	0	0	0	79.14	7.11	0	0	1.15942	0	0.917565	0.0824348	14.0647	1	0	0	14.0647	0	1	0
L136	847	MgAs	5	sp_ge_170321_48a_006.0_847.1a_10_an07a-02-b	4.8	0	0	0	0	0	0	0	75.36	19.84	0	0	1.05042	0	0.791597	0.208403	5.04032	1	0	0	5.04032	0	1	0
L136	201	MgAs	5	sp_ge_150519_34a_018.0_703.1a_03_an04a-05-b	0	0	3.61	8.4	0	0	0	0	65.2	22.79	0	0	1.13649	0	0.740993	0.259007	4.38789	1	0	0	4.38789	0	1	0
L137	847	MgAs	5	sp_ge_170321_48a_006.0_847.1a_10_an07a-03-b	0	0	0	0	0	0	0	0	95.51	4.49	0	0	1	0	0.9551	0.0449	22.2717	1	0	0	22.2717	0	1	0
L137	201	MgAs	5	sp_ge_150519_34a_018.0_703.1a_03_an04a-06-b	0	0	0	2.23	0	0	0	0	86.21	11.56	0	0	1.02281	0	0.881763	0.118237	8.65052	1	0	0	8.65052	0	1	0
L138	853	MgAs	5	sp_ge_170424_49a_010.0_853.1a_01_an01a-02-b	0	6.97	0	0	0	0	0	0	84.5	8.52	0	0	1.0001	0.069707	0.845085	0.0852085	11.7371	1	0	0	6.45578	0.449968	0.550032	0
L139	853	MgAs	5	sp_ge_170424_49a_010.0_853.1a_03_an02a-01-b	0	0	0	0	0	0	0	0	79.75	20.25	0	0	1	0	0.7975	0.2025	4.93827	1	0	0	4.93827	0	1	0
L140	853	MgAs	5	sp_ge_170424_49a_010.0_853.1a_03_an02a-02-b	0	5.57	0	0	0	0	0	0	88.19	6.24	0	0	1	0.0557	0.8819	0.0624	16.0256	1	0	0	8.4674	0.471634	0.528366	0
L141	853	MgAs	5	sp_ge_170424_49a_010.0_853.1a_05_an03a-04-b	0	8.09	0	0	0	0	0	0	85.74	6.17	0	0	1	0.0809	0.8574	0.0617	16.2075	1	0	0	7.01262	0.567321	0.432679	0
L143	201	MgAs	5	sp_ge_150519_34a_018.0_703.1a_07_an05b-01-b	0	6.13	0	0	0	0	0	0	79.91	13.96	0	0	1	0.0613	0.7991	0.1396	7.16332	1	0	0	4.9776	0.305127	0.694873	0
L144	853	MgAs	5	sp_ge_170424_49a_010.0_853.1a_08_an05a-01-b	0	0	0	0	0	0	0	0	84.27	15.73	0	0	1	0	0.8427	0.1573	6.35728	1	0	0	6.35728	0	1	0
L145	853	MgAs	5	sp_ge_170424_49a_010.0_853.1a_08_an05a-02-b	0	7.72	0	0	0	0	0	0	86.46	5.82	0	0	1	0.0772	0.8646	0.0582	17.1821	1	0	0	7.38552	0.570162	0.429838	0
L146		MgAs	5	sp_ge_170526_50a_020.0_856.1a_04_an01a-01-b	0	0	0	0	0	0	0	0	87.61	12.39	0	0	1	0	0.8761	0.1239	8.07103	1	0	0	8.07103	0	1	0
L146	201	MgAs	5	sp_ge_150519_34a_018.0_703.1a_11_an07b-01-b	0.95	5.86	0.51	0.93	0	0	0	0	80.22	10.85	0.68	0	1.03167	0.060456	0.827608	0.111936	8.67303	0.941023	0.0589766	0	5.98444	0.350688	0.649312	0
L147		MgAs	5	sp_ge_170526_50a_020.0_856.1a_04_an01a-02-b	0	4.33	0	0	0	0	0	0	84.05	11.63	0	0	0.9999	0.0432957	0.840416	0.116288	8.59845	1	0	0	6.26566	0.271303	0.728697	0
L147	201	MgAs	5	sp_ge_150519_34a_018.0_703.1a_11_an07b-02-b	0	3.85	1.3	0.36	0	0	0	0	84.76	9.48	0.25	0	1.01947	0.0392497	0.864104	0.0966459	10.2775	0.974306	0.0256937	0	7.50188	0.288822	0.711178	0
L148	201	MgAs	5	sp_ge_150519_34a_018.0_703.1a_12_an08b-01-b	3.57	11.75	0	0	0	0	0	0	81.43	3.24	0	0	1.03713	0.121863	0.844534	0.033603	30.8642	1	0	0	6.67111	0.783856	0.216144	0
L148		MgAs	5	sp_ge_170526_50a_020.0_856.1a_04_an01a-03-b	0	8.5	0	0	0	0	0	0	75.23	16.27	0	0	1	0.085	0.7523	0.1627	6.14628	1	0	0	4.03714	0.343157	0.656843	0
L158		MgAs	5	sp_ge_160330_41a_005.0_812.1a_01_an01b-01-b	0	7.31	0	0	0	0	0	0	84.74	7.95	0	0	1	0.0731	0.8474	0.0795	12.5786	1	0	0	6.55308	0.47903	0.52097	0
L159		MgAs	5	sp_ge_160330_41a_005.0_812.1a_01_an01b-02-b	0	5.7	0	0	0	0	0	0	87.46	6.84	0	0	1	0.057	0.8746	0.0684	14.6199	1	0	0	7.97448	0.454545	0.545455	0
L160		MgAs	5	sp_ge_160330_41a_005.0_812.1a_06_an06a-01-b	0	6.1	0	0.15	0	0	0	0	88.09	5.66	0	0	1.0015	0.0610916	0.882223	0.056685	17.6678	1	0	0	8.5034	0.518707	0.481293	0
L161	817	MgAs	5	sp_ge_160421_42a_010.0_817.1a_03_an02a-01-b	0	0	0	4.29	0	0	4.29	0	71.89	19.54	0	0	1.09373	0	0.786285	0.213715	5.11771	1	0	0	5.11771	0	1	0
L162	817	MgAs	5	sp_ge_160421_42a_010.0_817.1a_05_an04a-01-b	0	0	0	0	0	0	2.86	0	88.81	8.32	0	0	1.02955	0	0.914342	0.0856584	12.0192	1	0	0	12.0192	0	1	0
L163	817	MgAs	5	sp_ge_160421_42a_010.0_817.1a_06_an05a-01-b	0	0	0	0	0	0	4.44	0	75.41	20.14	0	0	1.04657	0	0.78922	0.21078	4.96524	1	0	0	4.96524	0	1	0
L164	817	MgAs	5	sp_ge_160421_42a_010.0_817.1a_06_an05a-02-b	0	0	0	0	0	0	0	0	85.48	14.52	0	0	1	0	0.8548	0.1452	6.88705	1	0	0	6.88705	0	1	0
L165	817	MgAs	5	sp_ge_160421_42a_010.0_817.1a_06_an05a-03-b	0	0	0	0	0	0	4.89	0	78.77	16.33	0	0	1.05152	0	0.828286	0.171714	6.1237	1	0	0	6.1237	0	1	0
L166	817	MgAs	5	sp_ge_160421_42a_010.0_817.1a_07_an06a-01-b	0	0	0	0	0	0	4.16	0	78.36	17.48	0	0	1.04341	0	0.817613	0.182387	5.72082	1	0	0	5.72082	0	1	0
L167	817	MgAs	5	sp_ge_160421_42a_010.0_817.1a_07_an06a-02-b	0	0	0	0	0	0	4.32	0	68.3	27.38	0	0	1.04515	0	0.713838	0.286162	3.6523	1	0	0	3.6523	0	1	0
L179		MgAs	5	sp_ge_160614_44a_010.0_827.1a_12_an03a-01-b	0	8.85	0	3.48	0	0	0	0	78.47	8.24	0.96	0	1.04646	0.092612	0.821159	0.0862285	10.8696	0.895652	0.104348	0	5.85138	0.517847	0.482153	0
L180		MgAs	5	sp_ge_160614_44a_010.0_827.1a_12_an03a-02-b	0	10.35	0	4.73	0	0	3.04	0	77.44	4.36	0.08	0	1.08519	0.112317	0.840369	0.0473142	22.5225	0.981982	0.018018	0	6.7981	0.703603	0.296397	0
L181		MgAs	5	sp_ge_160614_44a_010.0_827.1a_12_an03a-03-b	0	7.53	0	3.33	0	0	3.72	0	80.8	4.37	0.25	0	1.07875	0.0812298	0.871629	0.0471413	21.645	0.945887	0.0541126	0	8.40336	0.632773	0.367227	0
L182		MgAs	5	sp_ge_160614_44a_010.0_827.1a_14_an05a-01-b	1.3	7.28	0	0.21	0	0	4.04	0	75.74	10.39	1.04	0	1.07055	0.077936	0.810834	0.11123	8.74891	0.909011	0.0909886	0	5.65931	0.411998	0.588002	0
L183		MgAs	5	sp_ge_160614_44a_010.0_827.1a_14_an05a-02-b	0.55	12.41	0	0.88	0	0	3.38	0	74.88	7.91	0	0	1.05042	0.130357	0.786555	0.0830882	12.6422	1	0	0	4.92126	0.610728	0.389272	0
L184		MgAs	5	sp_ge_160614_44a_010.0_827.1a_15_an06a-01-b	0	11.32	0	1.18	0	0	3.1	0	77.99	6.25	0.17	0	1.04646	0.11846	0.816136	0.0654039	15.5763	0.97352	0.0264798	0	5.69152	0.64428	0.35572	0
L185		MgAs	5	sp_ge_160614_44a_010.0_827.1a_15_an06a-02-b	0.29	10.7	0	2.69	0	0	3.04	0	78.71	3.83	0.75	0	1.0725	0.114758	0.844166	0.0410768	21.8341	0.836245	0.163755	0	6.88231	0.736407	0.263593	0
L198		MgAs	5	sp_ge_160712_45a_018.0_832.2a_04_an04a-01-b	0	7.65	0	0	0	0	0	0	77.78	14.57	0	0	1	0.0765	0.7778	0.1457	6.86342	1	0	0	4.50045	0.344284	0.655716	0
L199		MgAs	5	sp_ge_160712_45a_018.0_832.2a_04_an04a-02-b	0	13	0	0	0	0	0	0	79.56	7.43	0	0	1.0001	0.130013	0.79568	0.0743074	13.459	1	0	0	4.89476	0.636319	0.363681	0
L208	841	MgAs	5	sp_ge_170221_47a_015.0_841.1a_04_an02a-01-b	0	7.5	0	0	0	0	0	0	90.98	1.53	0	0	0.9999	0.0749925	0.909709	0.0152985	65.3595	1	0	0	11.0742	0.830565	0.169435	0
L209	841	MgAs	5	sp_ge_170221_47a_015.0_841.1a_04_an02a-02-b	0	8.11	0	0	0	0	0	0	90.12	1.77	0	0	1	0.0811	0.9012	0.0177	56.4972	1	0	0	10.1215	0.82085	0.17915	0
L210	841	MgAs	5	sp_ge_170221_47a_015.0_841.1a_05_an03a-01-b	0	6.58	0	0	0	0	0	0	91.9	1.52	0	0	1	0.0658	0.919	0.0152	65.7895	1	0	0	12.3457	0.812346	0.187654	0
L211	841	MgAs	5	sp_ge_170221_47a_015.0_841.1a_07_an05a-01-b	0	4.31	0	0	0	0	0	0	94.13	1.57	0	0	0.9999	0.0430957	0.941206	0.0156984	63.6943	1	0	0	17.0068	0.732993	0.267007	0
L212	847	MgAs	5	sp_ge_170321_48a_006.0_847.1a_01_an01a-01-b	0	4.54	0	0	0	0	0	0	92.39	3.07	0	0	1	0.0454	0.9239	0.0307	32.5733	1	0	0	13.1406	0.596583	0.403417	0
L213	847	MgAs	5	sp_ge_170321_48a_006.0_847.1a_01_an01a-02-b	3.58	6.28	0	0	0	0	0	0	74.81	15.33	0	0	1.03713	0.0651317	0.775876	0.158992	6.52316	1	0	0	4.62749	0.290606	0.709394	0
L214	847	MgAs	5	sp_ge_170321_48a_006.0_847.1a_02_an02a-01-b	0	0	0	0	0	0	0	0	92.72	7.28	0	0	1	0	0.9272	0.0728	13.7363	1	0	0	13.7363	0	1	0
		a
		MC	Number	Lab	Na	Mg	Al	Si	P	S	Cl	K	Ca	As	Sr	Ba
		1	16	Proportion of zero values	0.6875	0.25	0.375	0.8125	1	1	0.6875	0.8125	0	0	0.125	0
		2	50		0.5	0	0.66	0.72	1	1	0.54	0.82	0	0	0.3	0
		3	70	Conservation criterion: proportion < 0.6	0.671429	0.428571	0.771429	0.928571	0.671429	0.857143	0.6	0.228571	0	0	0.0285714	0.985714
		4	34		0.0882353	0.323529	0.970588	0.970588	0.941176	1	0.0588235	0.235294	0	0	0	1
		5	97		0.680412	0.28866	0.752577	0.474227	0.989691	1	0.742268	0.927835	0	0	0.824742	0.989691
		Total	267		0.569288	0.273408	0.745318	0.722846	0.902622	0.962547	0.576779	0.629213	0	0	0.370787	0.745318
		b
		MC	Number	Left-censored	Na	Mg	Al	Si	P	S	Cl	K	Ca	As	Sr	Ba
		1	16	Proportion of values	0.9375	0.8125	0.6875	0.875	1	1	0.875	0.9375	0	0	0.25	0
		2	50	below the 1.0 mol% detection level	0.72	0	0.7	0.72	1	1	0.54	0.98	0	0	0.42	0
		3	70		0.8	0.828571	0.857143	0.928571	0.714286	0.871429	0.785714	0.314286	0	0	0.0714286	1
		4	34	Conservation criterion: proportion < 0.7	0.0882353	0.647059	0.970588	0.970588	0.941176	1	0.0588235	0.411765	0	0	0	1
		5	97		0.721649	0.28866	0.762887	0.587629	0.989691	1	0.773196	1	0	0	0.979381	1
		Total	267

## Sheet: 2) Lab&ROS
Gr	No	NaL	MgL	AlL	SiL	PL	SL	ClL	KL	CaL	AsL	SrL	BaL	SumL		MC	No	NaC	NaR	Mg,MgC	MgR	AlC	AlR	SiC	SiR	PC	PR	SC	SR	ClC	ClR	KC	KR	Ca	As	Sr, SrC	SrR	Ba
MC1	L001		0	1.00579						57.645	2.10302	1.71696	37.5292	100		1	L001	1		1		1	0.0255636	1.56						1		1		56.74	2.07	1.69	0.644324	36.94
MC1	L002		0	0.463056						58.2243	2.55688	1.41937	37.3364	100		1	L002	1		1		1	0.0464345	1						1		1		57.84	2.54	1.41	0.794651	37.09
MC1	L072		0	1.09449						56.1201	1.07441	1.79737	39.9136	100		1	L072	1		1		1.09	0.0697295	1						1		1		55.89	1.07	1.79	0.915424	39.75
MC1	L073		1.15927	2.35887						62.8327	1.16935	2.37903	30.1008	100		1	L073	1		1.15		2.34	0.0966264	1						1		1		62.33	1.16	2.36	1.02437	29.86
MC1	L079		0.27226	0						62.4786	1.94615	2.49067	32.8123	100		1	L079	1		1		1	0.1282	1						1		1		61.96	1.93	2.47	1.41	32.54
MC1	L105		2.51181	1.29047						49.4066	1.26743	1.94723	43.5764	100		1	L105	9.15		2.18		1.12	0.165733	1.72						2.33		1		42.88	1.1	1.69	1.43	37.82
MC1	L141		0	1.11989						56.5243	1.41986	2.10979	38.8261	100		1	L141	1		1		1.12	0.210904	1						1		1		56.53	1.42	2.11	1.56	38.83
MC1	L149		0.15	0						46.88	1.53	4.89	46.55	100		1	L149	1		1		1	0.266016	1						1		1		46.88	1.53	4.89	1.69	46.55
MC1	L151		0.55	4.71						55.55	1.4	3.73	34.06	100		1	L151	1		1		4.71	0.334354	1						1		1		55.55	1.4	3.73	1.69	34.06
MC1	L152		1.87	0						44.86	1.04	0	52.23	100		1	L152	1		1.87		1	0.420796	1						1		1		44.86	1.04	1	1.79	52.23
MC1	L153		0.54	0						64.54	1.26	1.56	32.1	100		1	L153	1		1		1	0.532939	1						1		1		64.54	1.26	1.56	1.85	32.1
MC1	L154		0.26	0						59.37	1.01	1.85	37.51	100		1	L154	1		1		1	1.09	1						1		1		59.37	1.01	1.85	2.11	37.51
MC1	L155		0.251915	0.79605						60.3587	2.04555	1.44095	35.1068	100		1	L155	1		1		1	1.12	1						1		1		59.9	2.03	1.43	2.36	34.84
MC1	L156		0.311245	0.190763						66.3052	1.09438	0.722892	31.3755	100		1	L156	1		1		1	1.12	1						1		1		66.04	1.09	1	2.47	31.25
MC1	L157		0.60429	0.705006						73.24	1.11794	0.725149	23.6076	100		1	L157	1		1		1	2.34	1						1		1		72.72	1.11	1	3.73	23.44
MC1	L203		1.0041	0						58.713	1.53315	0	38.7497	100		1	L203	1		1		1	4.71	1						5.48		1.38		54.38	1.42	1	4.89	35.89
MC2	L019	0	13.2892					0		16.0817	11.0155	0	59.6137	100		2	L019	1		12.04		2.64		6.76						1	0.694589	1		14.57	9.98	1	0.38118	54.01
MC2	L034	2.02871	10.4557					0		16.7811	1.21723	2.60092	66.9164	100		2	L034	1.95		10.05		3.89		1						1	0.867854	1		16.13	1.17	2.5	0.447418	64.32
MC2	L093	2.82291	8.69212					0		16.7242	4.98578	1.47238	65.3026	100		2	L093	2.78		8.56		1.53		1						1	1.00206	1		16.47	4.91	1.45	0.496166	64.31
MC2	L094	1.63934	8.54078					0		13.4285	2.32746	1.4066	72.6574	100		2	L094	1.62		8.44		1		1						1	1.11832	1		13.27	2.3	1.39	0.536911	71.8
MC2	L095	3.01715	9.66109					0		13.3395	2.50052	2.2112	69.2705	100		2	L095	2.92		9.35		3.22		1						1	1.22423	1		12.91	2.42	2.14	0.572992	67.04
MC2	L096	3.80633	8.9728					0		15.8242	2.39545	2.1011	66.9001	100		2	L096	3.75		8.84		1.27		1						1	1.32353	1		15.59	2.36	2.07	0.606024	65.91
MC2	L097	3.60636	9.47433					0		12.9381	2.45518	2.61817	68.9079	100		2	L097	3.54		9.3		1.84		1						1	1.41839	1		12.7	2.41	2.57	0.636924	67.64
MC2	L098	2.69282	10.3038					0		14.9172	1.69698	1.86973	68.5195	100		2	L098	2.65		10.14		1.52		1						1	1.5102	1		14.68	1.67	1.84	0.666276	67.43
MC2	L114	0	9.19875					6.45161		14.6722	3.08012	1.72737	64.8699	100		2	L114	1		8.84		1		3.9						6.2	1.59995	1		14.1	2.96	1.66	0.694476	62.34
MC2	L115	0	7.30091					7.6578		19.5167	3.15081	1.44795	60.9259	100		2	L115	1		7.16		1		1.92						7.51	1.68834	1		19.14	3.09	1.42	0.72181	59.75
MC2	L117	0.63535	11.1134					6.60348		12.5299	3.3434	1.42693	64.3475	100		2	L117	1		10.67		1		4						6.34	1.77592	1		12.03	3.21	1.37	0.748494	61.78
MC2	L118	0	7.89614					6.61913		14.345	3.51176	1.42599	66.202	100		2	L118	1		7.42		1		6.03						6.22	1.86315	1		13.48	3.3	1.34	0.774696	62.21
MC2	L121	0	8.78239					7.49828		16.2577	2.18986	0	65.2717	100		2	L121	1		7.66		2.48		10.3						6.54	1.95041	1		14.18	1.91	1	0.800553	56.93
MC2	L122	0	7.13					11.43		16.35	2.74	0.93	61.42	100		2	L122	1		7.13		1		1						11.43	2.03802	1		16.35	2.74	1	0.82618	61.42
MC2	L124	0	9.33					6.28		16.97	1.42	1.75	64.25	100		2	L124	1		9.33		1		1						6.28	2.12628	1		16.97	1.42	1.75	0.851676	64.25
MC2	L128	0.743264	10.9838					0		15.6292	4.43894	1.40394	66.8009	100		2	L128	1		10.64		1		1.76						1	2.21546	1		15.14	4.3	1.36	0.877126	64.71
MC2	L129	1.3325	10.3893					0		11.8364	6.27733	0.957735	69.2067	100		2	L129	1.28		9.98		1.4		2.54						1	2.30581	1		11.37	6.03	1	0.90261	66.48
MC2	L138	0.432718	14.1847					0		11.0607	2.3219	1.47757	70.5224	100		2	L138	1		13.44		1.31		3.36						1	2.39759	1		10.48	2.2	1.4	0.928198	66.82
MC2	L139	2.0913	10.5732					0		14.4268	4.83015	1.19958	66.879	100		2	L139	1.97		9.96		2.8		2.62						1	2.49104	1		13.59	4.55	1.13	0.953959	63
MC2	L140	1.53196	11.3048					0		8.75858	2.50396	1.7327	74.168	100		2	L140	1.45		10.7		1.75		2.53						1	2.58642	1.07		8.29	2.37	1.64	0.97996	70.2
MC2	L142	0	12.23					0		20.01	8.06	0	59.7	100		2	L142	1		12.23		1		1						1	2.68398	1		20.01	8.06	1	1.00626	59.7
MC2	L143	0	12.66					0		21.69	1.72	0	63.93	100		2	L143	1		12.66		1		1						1	2.78399	1		21.69	1.72	1	1.01	63.93
MC2	L144	1.63457	9.73451					0		14.5966	5.00781	1.43675	67.5898	100		2	L144	1.57		9.35		1.91		2.02						1	2.88675	1		14.02	4.81	1.38	1.05	64.92
MC2	L145	0.283673	10.3803					0		14.3833	5.58941	0.882538	68.4808	100		2	L145	1		9.88		2.38		2.43						1	2.99254	1		13.69	5.32	1	1.12	65.18
MC2	L153	0	12.5973					0		18.2489	1.284	5.43929	62.4305	100		2	L153	1		12.46		1.09		1						1	3.10171	1		18.05	1.27	5.38	1.13	61.75
MC2	L168	1.2	9.06					0		20.75	2.5	1.87	64.62	100		2	L168	1.2		9.06		1		1						1	3.2146	1		20.75	2.5	1.87	1.18	64.62
MC2	L169	1.10989	10.5789					0		19.1681	2.32977	2.12979	64.6835	100		2	L169	1.11		10.58		1		1						1	3.33163	1		19.17	2.33	2.13	1.34	64.69
MC2	L170	0.510051	10.9711					0		18.4818	1.81018	1.18012	67.0467	100		2	L170	1		10.97		1		1						1	1.61	1		18.48	1.81	1.18	1.36	67.04
MC2	L171	0.33	11.26					0		16.77	1.78	0.94	68.92	100		2	L171	1		11.26		1		1						1	2.93	1		16.77	1.78	1	1.37	68.92
MC2	L172	0	8.62					0		25.72	1.19	1.12	63.35	100		2	L172	1		8.62		1		1						1	2.99	1		25.72	1.19	1.12	1.38	63.35
MC2	L173	1.06	9.57					0		24.92	1.64	1.64	61.17	100		2	L173	1.06		9.57		1		1						1	4.12	1		24.92	1.64	1.64	1.39	61.17
MC2	L174	0	11.2789					0		17.9082	3.21968	1.75982	65.8334	100		2	L174	1		11.28		1		1						1	4.12	1		17.91	3.22	1.76	1.4	65.84
MC2	L175	0.58	10.93					0		16.93	5.07	1.05	65.44	100		2	L175	1		10.93		1		1						1	4.76	1		16.93	5.07	1.05	1.42	65.44
MC2	L176	0.11	8.08					0		17.2	5.06	0	69.55	100		2	L176	1		8.08		1		1						1	4.77	1		17.2	5.06	1	1.45	69.55
MC2	L177	0	8.63086					9.43094		14.7615	12.1312	1.53015	53.5154	100		2	L177	1		8.63		1		1						9.43	6.2	1		14.76	12.13	1.53	1.53	53.51
MC2	L186	0	9.64904					8.56914		16.4984	10.8289	0	54.4546	100		2	L186	1		9.65		1		1						8.57	6.22	1		16.5	10.83	1	1.64	54.46
MC2	L187	0	9.81					8.36		17.01	9.4	0	55.42	100		2	L187	1		9.81		1		1						8.36	6.28	1		17.01	9.4	1	1.64	55.42
MC2	L188	0	9.96					7.49		12.9	6	0	63.65	100		2	L188	1		9.96		1		1						7.49	6.34	1		12.9	6	1	1.64	63.65
MC2	L189	0	10.109					9.73903		12.5787	6.27937	0	61.2939	100		2	L189	1		10.11		1		1						9.74	6.52	1		12.58	6.28	1	1.66	61.3
MC2	L190	0	8.18					8.8		21.7	6.11	0	55.21	100		2	L190	1		8.18		1		1						8.8	6.54	1		21.7	6.11	1	1.66	55.21
MC2	L191	0	9.26093					7.79078		14.1014	12.9813	0.320032	55.5456	100		2	L191	1		9.26		1		1						7.79	6.56	1		14.1	12.98	1	1.75	55.54
MC2	L192	0	8.38255					6.75578		16.6304	9.66739	0.860015	57.7039	100		2	L192	1		8.09		1		3.48						6.52	7.49	1		16.05	9.33	1	1.76	55.69
MC2	L193	0	11					2.99		10.98	11.48	0	63.55	100		2	L193	1		11		1		1						2.99	7.51	1		10.98	11.48	1	1.84	63.55
MC2	L194	0	11.74					4.76		10.9	14.16	0	58.44	100		2	L194	1		11.74		1		1						4.76	7.79	1		10.9	14.16	1	1.87	58.44
MC2	L195	0	8.64					4.12		12.57	9.9	0	64.77	100		2	L195	1		8.64		1		1						4.12	8.36	1		12.57	9.9	1	2.07	64.77
MC2	L196	0	12.6913					4.12041		11.4111	18.5819	0	53.1953	100		2	L196	1		12.69		1		1						4.12	8.57	1		11.41	18.58	1	2.13	53.19
MC2	L197	0	11.32					4.77		12.86	8.5	0	62.55	100		2	L197	1		11.32		1		1						4.77	8.8	1		12.86	8.5	1	2.14	62.55
MC2	L200	0.48	10.39					6.56		13.53	6.7	1.64	60.7	100		2	L200	1		10.39		1		1						6.56	9.43	1		13.53	6.7	1.64	2.5	60.7
MC2	L201	0.76221	9.50757					2.93852		16.0666	5.67646	1.01294	64.0357	100		2	L201	1		9.48		1		1						2.93	9.74	1		16.02	5.66	1.01	2.57	63.85
MC2	L202	0.300661	7.9074					1.61355		24.083	6.03327	1.66366	58.3985	100		2	L202	1		7.89		1		1						1.61	11.43	1		24.03	6.02	1.66	5.38	58.27
MC3	L003		0						0	85.86	8.55	5.59		100		3	L003	1		1		1		1						1		1	0.468114	85.86	8.55	5.59	0.93699
MC3	L004		0.223919						1.50636	95.3282	1.10941	1.83206		100		3	L004	1		1		1		1						1		1.48	0.528544	93.66	1.09	1.8	1.13355
MC3	L005		0.325269						1.38239	91.3905	1.13844	5.76337		100		3	L005	1		1		1.13		1						1		1.36	0.5712	89.91	1.12	5.67	1.27975
MC3	L006		0.420729						1.95998	90.5285	1.72396	5.36685		100		3	L006	1		1		1.06		1						1.09		1.91	0.605762	88.22	1.68	5.23	1.40245
MC3	L007		0.942727						0.93259	91.6574	1.97669	4.49062		100		3	L007	1		1		1		1						1.15		1	0.63558	90.42	1.95	4.43	1.51122
MC3	L008		0.635637						1.3943	92.5774	2.1017	3.29096		100		3	L008	1		1		1.73		1						1		1.36	0.662255	90.3	2.05	3.21	1.01
MC3	L009		0.78553						1.39535	93.1783	1.19897	3.44186		100		3	L009	1		1		1		1						1		1.35	0.686686	90.15	1.16	3.33	1.16
MC3	L010		0						1.11145	84.4601	14.4285	0		100		3	L010	1		1		1		1						1.06		1.09	0.709436	82.83	14.15	1	1.64
MC3	L011		0.811606						1.1261	84.9549	13.1074	0		100		3	L011	1		1		1		1						1		1.11	0.730882	83.74	12.92	1	1.71
MC3	L012		1.03824						2.33347	87.5514	1.0588	8.01809		100		3	L012	1		1.01		1.56		1						1.17		2.27	0.751293	85.17	1.03	7.8	1.8
MC3	L013		1.32006						1.71608	83.0524	2.88383	11.0276		100		3	L013	1		1.3		1		1						1.52		1.69	0.770865	81.79	2.84	10.86	2.07
MC3	L014		0.594998						1.43203	87.3235	3.11618	7.53328		100		3	L014	1		1		1		1						1		1.42	0.789749	86.59	3.09	7.47	2.16
MC3	L015		0.40201						1.19598	89.2362	2.50251	6.66332		100		3	L015	1		1		1		1						1		1.19	0.808064	88.79	2.49	6.63	2.23
MC3	L016		0						1.13756	92.3847	1.8538	4.62397		100		3	L016	1		1		1		1						1		1.08	0.825905	87.71	1.76	4.39	2.34
MC3	L017		0						0.878845	92.8228	3.38983	2.90856		100		3	L017	1		1		1		1						1		1	0.843349	88.72	3.24	2.78	2.64
MC3	L018		0						2.08658	86.3179	4.2043	7.39126		100		3	L018	1		1		1		1						1		2.01	0.860461	83.15	4.05	7.12	2.64
MC3	L042		0						1.07516	88.8565	1.82878	8.23955		100		3	L042	1		1		1		1						1		1.07	0.877297	88.43	1.82	8.2	2.74
MC3	L043		0						1.18379	86.3664	1.02327	11.4266		100		3	L043	1		1		1		1						1		1.18	0.893904	86.09	1.02	11.39	2.78
MC3	L044		0.11						0.51	89.01	1.1	9.27		100		3	L044	1		1		1		1						1		1	0.910323	89.01	1.1	9.27	2.79
MC3	L045		0						0.922861	91.2729	1.53476	6.26944		100		3	L045	1		1		1		1						1		1	0.926592	90.99	1.53	6.25	2.83
MC3	L046		0						0	89.76	6.27	3.97		100		3	L046	1		1		1		1						1		1	0.942742	89.76	6.27	3.97	2.98
MC3	L047		0						1.03	90.57	2.01	6.39		100		3	L047	1		1		1		1						1		1.03	0.958803	90.57	2.01	6.39	3.21
MC3	L048		0.874727						0	89.5658	3.5718	5.98771		100		3	L048	1		1		1		1						1		1	1.03	86.01	3.43	5.75	3.33
MC3	L049		0						0	95.9767	1.27872	2.74457		100		3	L049	1		1		1		1						1		1	1.04	92.32	1.23	2.64	3.74
MC3	L050		1.01341						0	93.1278	2.87132	2.98744		100		3	L050	1		1		1		1						1		1	1.05	88.22	2.72	2.83	3.86
MC3	L053		0						0	92.8985	1.63313	5.46834		100		3	L053	1		1		5.09		1						1		1	1.05	88.17	1.55	5.19	3.88
MC3	L054		1.13408						1.32477	91.7804	1.47531	4.28543		100		3	L054	1		1.13		1		1						1		1.32	1.07	91.45	1.47	4.27	3.89
MC3	L055		0.592965						1.20603	92.8141	1.48744	3.8995		100		3	L055	1		1		1		1						1		1.2	1.08	92.35	1.48	3.88	3.97
MC3	L056		0.602164						1.06144	93.019	1.34721	3.9702		100		3	L056	2.02		1		1		1						1		1.04	1.09	91.14	1.32	3.89	4.18
MC3	L057		0.141614						1.42626	93.688	2.3771	2.36698		100		3	L057	1.14		1		1		1						1		1.41	1.11	92.62	2.35	2.34	4.27
MC3	L058		1.08838						1.76317	78.8093	1.08838	17.2508		100		3	L058	5.69		1		1		1						2.42		1.62	1.12	72.41	1	15.85	4.39
MC3	L059		0						1.05549	89.4853	1.83957	7.61962		100		3	L059	1		1		1		1						1		1.05	1.12	89.02	1.83	7.58	4.43
MC3	L060		0.273141						1.50733	89.0946	1.56803	7.5569		100		3	L060	1.15		1		1		1						1		1.49	1.18	88.07	1.55	7.47	4.53
MC3	L061		0.33						1.52	89.49	1.39	7.27		100		3	L061	1		1		1		1						1		1.52	1.18	89.49	1.39	7.27	4.55
MC3	L062		0						1.15726	91.0415	2.58318	5.21802		100		3	L062	3.22		1		1		1						1		1.12	1.18	88.11	2.5	5.05	4.67
MC3	L063		0.22496						1.26406	88.902	2.05678	7.55222		100		3	L063	1		1		1		1						1		1.18	1.19	82.99	1.92	7.05	5.05
MC3	L064		0.515308						1.32363	88.734	1.38426	8.04284		100		3	L064	1		1		1		1						1		1.31	1.2	87.82	1.37	7.96	5.19
MC3	L066		0.66						0	86.83	2.31	10.2		100		3	L066	1		1		1		1						1		1	1.23	86.83	2.31	10.2	5.23
MC3	L067		0						2.19318	85.844	2.7027	9.26008		100		3	L067	1		1		1		1						1		1.98	1.31	77.5	2.44	8.36	5.23
MC3	L068		0						0	88.9	1.97	9.13		100		3	L068	1		1		1		1						1		1	1.32	88.9	1.97	9.13	5.26
MC3	L069		1.45734						1.53521	85.5268	1.86895	9.61175		100		3	L069	4.18		1.31		1		1						4.76		1.38	1.33	76.88	1.68	8.64	5.59
MC3	L070		2.00514						2.48197	85.5239	1.27155	8.71745		100		3	L070	5.96		1.64		1		1						3.13		2.03	1.33	69.95	1.04	7.13	5.67
MC3	L071		1.57196						2.59665	86.6791	1.17606	7.97625		100		3	L071	4.32		1.35		1		1						2.7		2.23	1.35	74.44	1.01	6.85	5.75
MC3	L074		0						0	92.15	2.62	5.23		100		3	L074	1		1		1		1						1		1	1.36	92.15	2.62	5.23	6.25
MC3	L075		0						0	84.4696	1.8844	13.646		100		3	L075	1		1		1		1						5.54		1	1.36	79.79	1.78	12.89	6.34
MC3	L076		0						0	90.439	5.38054	4.18042		100		3	L076	1		1		1		1						1		1	1.38	90.43	5.38	4.18	6.39
MC3	L077		1.08011						1.05011	92.1292	1.21012	4.53045		100		3	L077	1		1.08		1		1						1		1.05	1.41	92.12	1.21	4.53	6.43
MC3	L078		0						0.669933	94.6805	1.66983	2.9797		100		3	L078	1		1		1		1						1		1	1.42	94.69	1.67	2.98	6.63
MC3	L081		0						1.7831	92.892	2.68686	2.63801		100		3	L081	1		1		1		1						1.56		1.46	1.46	76.06	2.2	2.16	6.85
MC3	L082		0						2.17226	92.6067	2.38821	2.83283		100		3	L082	1		1		1.44		4.87						1.65		1.71	1.48	72.9	1.88	2.23	7.05
MC3	L083		0.791526						2.3513	91.9567	2.49098	2.4095		100		3	L083	1.16		1		1		1						1.13		2.02	1.49	79	2.14	2.07	7.12
MC3	L084		0.991718						1.97254	93.5157	1.6565	1.86356		100		3	L084	1.44		1		1.02		2.31						1.33		1.81	1.52	85.81	1.52	1.71	7.13
MC3	L085		1.14723						3.97945	90.9895	1.924	1.95985		100		3	L085	3.19		1		1.51		2.82						1.79		3.33	1.55	76.14	1.61	1.64	7.27
MC3	L086		0						2.20776	95.3392	1.66382	0.789249		100		3	L086	1		1		1		1						1		2.07	1.62	89.39	1.56	1	7.47
MC3	L087		0						1.43961	95.5758	1.62687	1.35768		100		3	L087	1.13		1		1.3		8.15						1		1.23	1.69	81.66	1.39	1.16	7.47
MC3	L088		0						1.10797	96.4274	1.32278	1.14189		100		3	L088	1.68		1		2.24		5.56						1		1	1.71	85.29	1.17	1.01	7.58
MC3	L089		0.370999						1.88679	95.3996	1.79139	0.551198		100		3	L089	2.3		1		1		1						1		1.78	1.78	90	1.69	1	7.63
MC3	L090		0						1.15762	92.1344	3.97933	2.72868		100		3	L090	1		1		1		1						1		1.12	1.78	89.14	3.85	2.64	7.8
MC3	L091		0						1.3559	92.4763	3.32348	2.84433		100		3	L091	1		1		1		1						1		1.33	1.81	90.71	3.26	2.79	7.96
MC3	L092		0						1.22356	89.465	6.47034	2.84114		100		3	L092	1		1		1		1						1		1.18	1.9	86.28	6.24	2.74	8.2
MC3	L149		1.66983						1.77982	94.6005	1.38986	0.559944		100		3	L149	1		1.67		1		1						1		1.78	1.91	94.61	1.39	1	8.36
MC3	L150		1.19988						0	93.2807	1.77982	3.73963		100		3	L150	1		1.2		1		1						1		1	1.98	93.29	1.78	3.74	8.64
MC3	L152		2.30912						0	88.0405	2.7448	6.90557		100		3	L152	1		2.12		1		1						1		1	2.01	80.83	2.52	6.34	9.13
MC3	L154		0.31						0	90.58	4.44	4.67		100		3	L154	1		1		1		1						1		1	2.02	90.58	4.44	4.67	9.27
MC3	L204		0						0	90.9994	2.41655	6.58407		100		3	L204	1		1		1		1						1		1	2.03	88.87	2.36	6.43	10.2
MC3	L205		0						0	94.61	1.53	3.86		100		3	L205	1		1		1		1						1		1	2.07	94.61	1.53	3.86	10.86
MC3	L206		0.269973						1.32987	91.0909	2.0498	5.25947		100		3	L206	1		1		1		1						1		1.33	2.23	91.1	2.05	5.26	11.14
MC3	L207		0.58						1.55	85.65	1.08	11.14		100		3	L207	1		1		1		1						1		1.55	2.27	85.65	1.08	11.14	11.39
MC3	L150		2.4522						3.46765	87.4797	1.68521	4.9152		100		3	L150	1		2.27		1		1						1		3.21	3.21	80.98	1.56	4.55	12.89
MC3	L151		0.51						1.9	88.36	1.6	7.63		100		3	L151	1		1		1		1						1		1.9	3.33	88.36	1.6	7.63	15.85
MC4	T001	4.2	0					6.3	1.6	71.2	11.2	5.5		100		4	T001	4.2	0.425143	1	0.210195	1		1						6.3	1.33182	1.6	0.276391	71.2	11.2	5.5
MC4	T002	4.1041	3.3033					6.80681	1.3013	68.6687	9.70971	6.10611		100		4	T002	4.1	0.58999	3.3	0.281746	1		1						6.8	1.68391	1.3	0.349708	68.6	9.7	6.1
MC4	T003	7.2	4.3					12	0	65.3	5.5	5.7		100		4	T003	7.2	0.729703	4.3	0.341314	1		1						12	2.2	1	0.407879	65.3	5.5	5.7
MC4	T004	22.8	2.2					19.9	1.2	43.4	8	2.5		100		4	T004	22.8	1.1	2.2	0.395833	1		1						19.9	2.2	1.2	0.459323	43.4	8	2.5
MC4	T005	26.5265	2.1021					29.1291	0.800801	32.8328	6.80681	1.8018		100		4	T005	26.5	1.2	2.1	0.447896	1		1						29.1	2.3	1	0.507102	32.8	6.8	1.8
MC4	T006	27	3.4					28.3	1.4	32.2	5.4	2.3		100		4	T006	27	1.2	3.4	0.498836	1		1						28.3	3.8	1.4	0.552748	32.2	5.4	2.3
MC4	T007	13	4.3					13.9	2.1	55.3	8	3.4		100		4	T007	13	1.4	4.3	0.549478	1		1						13.9	4.2	2.1	0.59717	55.3	8	3.4
MC4	T008	3	0.2					5	0	71.3	13.8	6.7		100		4	T008	3	1.7	1	0.600404	1		1						5	4.3	1	0.640978	71.3	13.8	6.7
MC4	T009	3.50701	0.501002					4.20842	1.1022	76.8537	7.91583	5.91182		100		4	T009	3.5	1.9	1	0.652066	1		1						4.2	4.5	1.1	0.684617	76.7	7.9	5.9
MC4	T010	2.8	0.2					6	1.6	70.2	13.4	5.8		100		4	T010	2.8	1.9	1	0.704851	1		1						6	4.6	1.6	0.728443	70.2	13.4	5.8
MC4	T011	2.6	0.1					4.5	1	73.6	13.8	4.4		100		4	T011	2.6	2.5	1	0.759109	1		1						4.5	4.6	1	0.772754	73.6	13.8	4.4
MC4	T012	6.4	2.2					9.8	3	61.5	9.6	7.5		100		4	T012	6.4	2.6	2.2	0.815181	1		1						9.8	5	3	0.817821	61.5	9.6	7.5
MC4	T013	7.9	2.3					11.1	3	60.1	8.8	6.8		100		4	T013	7.9	2.8	2.3	0.873411	1		1						11.1	5.5	3	0.863897	60.1	8.8	6.8
MC4	T014	4.1	0.3					7.2	1.4	65.2	15.8	6		100		4	T014	4.1	3	1	0.934162	1		1						7.2	5.6	1.4	0.911234	65.2	15.8	6
MC4	T015	2.4975	0.0999001					5.59441	0.599401	68.6314	17.4825	5.09491		100		4	T015	2.5	3.3	1	0.997826	1		1						5.6	5.8	1	1.1	68.7	17.5	5.1
MC4	T016	4.6	0.8					6.4	0.8	69.3	12	6.1		100		4	T016	4.6	3.5	1	1.06484	1		1						6.4	6	1	1.1	69.3	12	6.1
MC4	T017	4	1.9					9.7	1	69.8	6.4	7.2		100		4	T017	4	4	1.9	1.1357	1		1						9.7	6.3	1	1.1	69.8	6.4	7.2
MC4	T018	6.10611	2.1021					8.20821	1.6016	66.8669	8.20821	6.90691		100		4	T018	6.1	4.1	2.1	1.21097	1		1						8.2	6.4	1.6	1.2	66.8	8.2	6.9
MC4	T019	9.10952	3.5824					15.4555	2.55885	52.5077	7.3695	9.41658		100		4	T019	8.9	4.1	3.5	1.29133	1		1						15.1	6.8	2.5	1.3	51.3	7.2	9.2
MC4	T020	4.3	0					8.6	2.1	62.2	19.6	3.2		100		4	T020	4.3	4.1	1	1.37756	1		1						8.6	7.2	2.1	1.4	62.2	19.6	3.2
MC4	T021	4.8	0					9.3	2	66.2	13.9	3.8		100		4	T021	4.8	4.2	1	1.47063	1		1						9.3	7.8	2	1.4	66.2	13.9	3.8
MC4	T022	4.1041	0.4004					7.80781	2.4024	68.8689	8.50851	7.90791		100		4	T022	4.1	4.3	1	1.57172	1		1						7.8	8.2	2.4	1.4	68.8	8.5	7.9
MC4	T023	1.2	0					4.3	1.1	75.4	11.6	6.4		100		4	T023	1.2	4.6	1	1.9	1		1						4.3	8.6	1.1	1.6	75.4	11.6	6.4
MC4	T024	1.4	0					5.5	1.4	69.3	14.1	8.3		100		4	T024	1.4	4.8	1	2.1	1		1						5.5	9.3	1.4	1.6	69.3	14.1	8.3
MC4	T025	1.9	0.5					4.6	1.1	72.9	12.1	6.9		100		4	T025	1.9	6.1	1	2.1	1		1						4.6	9.7	1.1	1.6	72.9	12.1	6.9
MC4	T026	1.9	1					4.6	1.8	72.7	9.7	8.3		100		4	T026	1.9	6.4	1	2.2	1		1						4.6	9.8	1.8	1.8	72.7	9.7	8.3
MC4	T027	1.2012	0.2002					3.8038	0.900901	74.1742	13.1131	6.60661		100		4	T027	1.2	7.2	1	2.2	1		1						3.8	11.1	1	2	74.1	13.1	6.6
MC4	T028	10.7527	8.60215					17.3118	6.98925	28.7097	3.44086	24.1935		100		4	T028	10	7.9	8	2.3	1		1						16.1	12	6.5	2.1	26.7	3.2	22.5
MC4	T029	0	0					0	0	80	17.1	2.9		100		4	T029	1	8.9	1	3.3	1		1						1	13.9	1	2.1	80	17.1	2.9
MC4	T030	0	0					2.2	0	82.4	12.1	3.3		100		4	T030	1	10	1	3.4	1		1						2.2	15.1	1	2.4	82.4	12.1	3.3
MC4	T031	1.21413	0					2.53863	0	80.2428	14.2384	1.766		100		4	T031	1.1	13	1	3.5	4.7		4.7						2.3	16.1	1	2.5	72.7	12.9	1.6
MC4	T032	1.6983	0					2.1978	0	80.3197	13.0869	2.6973		100		4	T032	1.7	22.8	1	4.3	1		1						2.2	19.9	1	3	80.4	13.1	2.7
MC4	T033	0	0					0	0	89	8.9	2.1		100		4	T033	1	26.5	1	4.3	1		1						1	28.3	1	3	89	8.9	2.1
MC4	T034	3.3	0					5.8	0	70.7	17.4	2.8		100		4	T034	3.3	27	1	8	1		1						5.8	29.1	1	6.5	70.7	17.4	2.8
MC5	L024		4.36		10.3					80.53	4.81			100		5	L024	1		4.36	1.27916	1		10.3	0.0280795					1		1		80.53	4.81
MC5	L025		4.26309		4.51685					89.4032	1.81689			100		5	L025	1		4.2	1.48762	1		4.45	0.0421206					1.45		1		88.08	1.79
MC5	L026		5.2343		26.7922					61.5082	6.46529			100		5	L026	1		5.06	1.63715	2.49		25.9	0.054483					1		1		59.46	6.25
MC5	L027		5.094		3.98067					87.3018	3.62357			100		5	L027	1		4.85	1.75945	2.37		3.79	0.0661238					1.84		1		83.12	3.45
MC5	L028		0		6.53					77.23	16.24			100		5	L028	1		1	1.86564	1		6.53	0.0774068					1		1		77.23	16.24
MC5	L029		0		9.7329					84.2574	6.00971			100		5	L029	1		1	1.96104	1		9.62	0.0885171					1.15		1		83.28	5.94
MC5	L030		3.7464		13.6373					81.4739	1.14245			100		5	L030	1		3.64	2.04869	1.94		13.25	0.0995654					1		1		79.16	1.11
MC5	L031		3.53744		12.4121					82.5714	1.47911			100		5	L031	1		3.42	2.13049	3.32		12	0.110625					1		1		79.83	1.43
MC5	L032		8.85021		0					89.5886	1.56118			100		5	L032	2.15		8.39	2.20771	2.23		1	0.121749					1		1		84.93	1.48
MC5	L033		6.67626		0					89.6368	3.68689			100		5	L033	7.22		6.03	2.28125	2.08		1	0.132976					1		1		80.96	3.33
MC5	L035		5.2654		0.946708					91.0116	2.7763			100		5	L035	5.98		4.95	2.3518	1		1	0.14434					1		1		85.56	2.61
MC5	L036		4.84742		1.9099					88.3434	4.89931			100		5	L036	3.65		4.67	2.41985	1		1.84	0.155865					1		1		85.11	4.72
MC5	L037		6.27414		1.12747					84.3721	8.22633			100		5	L037	4.21		6.01	2.48581	1		1.08	0.167575					1		1		80.82	7.88
MC5	L038		5.28104		4.00453					85.2069	5.50751			100		5	L038	2.87		5.13	2.55001	1		3.89	0.17949					1		1		82.77	5.35
MC5	L039		5.71066		2.5698					89.7737	1.94585			100		5	L039	3.49		5.4	2.61269	1.95		2.43	0.19163					1		1		84.89	1.84
MC5	L040		4.42166		3.38614					89.1271	3.06513			100		5	L040	1		4.27	2.67408	2.77		3.27	0.20401					1		1		86.07	2.96
MC5	L041		3.53588		6.94732					78.8158	10.701			100		5	L041	1.45		3.41	2.73437	2.11		6.7	0.216648					1		1		76.01	10.32
MC5	L099		6.60951		0					91.4261	1.9644			100		5	L099	5.16		6.09	2.7937	2.41		1	0.22956					1		1		84.24	1.81
MC5	L100		6.98161		0					91.4193	1.59908			100		5	L100	4.12		6.68	2.85221	1		1	0.24276					1		1		87.47	1.53
MC5	L101		6.7539		0					91.5682	1.67792			100		5	L101	5.06		6.4	2.91003	1		1	0.256266					1		1		86.77	1.59
MC5	L102		12.9015		6.95103					72.0484	8.099			100		5	L102	4		12.25	2.96724	1		6.6	0.270091					1		1		68.41	7.69
MC5	L103		9.56781		6.01581					73.6475	10.7689			100		5	L103	2.52		9.32	3.02396	1		5.86	0.284253					1		1		71.74	10.49
MC5	L106		6.25202		1.59534					87.9056	4.24706			100		5	L106	3.33		5.8	3.08025	2.97		1.48	0.298766					1		1		81.55	3.94
MC5	L107		8.97899		0.451773					84.8769	5.69234			100		5	L107	8.57		7.95	3.13619	1.6		1	0.313647					1.29		1		75.15	5.04
MC5	L108		4.19821		0.630879					93.1865	1.9844			100		5	L108	8.93		3.66	3.19185	1.19		1	0.328912					1		1		81.24	1.73
MC5	L109		8.65556		0.722222					87.9222	2.7			100		5	L109	7.84		7.79	3.2473	1.72		1	0.34458					1		1		79.13	2.43
MC5	L110		6.17881		1.34322					86.5248	5.95315			100		5	L110	4.97		5.75	3.30259	1.06		1.25	0.360667					1		1		80.52	5.54
MC5	L111		6.77011		0.371984					84.1641	8.6938			100		5	L111	3.62		6.37	3.35777	1.54		1	0.377192					1		1		79.19	8.18
MC5	L112		5.59149		1.38744					87.5652	5.45587			100		5	L112	2.52		5.36	1.52	1.3		1.33	0.394175					1		1		83.94	5.23
MC5	L113		7.12809		2.01328					89.1392	1.71945			100		5	L113	6.2		6.55	1.63	1.14		1.85	0.411636					1		1		81.91	1.58
MC5	L116		5.74		1.2					90.38	2.68			100		5	L116	1		5.74	3.35	1		1.2	0.429594					1		1		90.38	2.68
MC5	L119		7.04153		3.6287					76.6139	12.7159			100		5	L119	1		6.85	3.41	1		3.53	0.448074					2.71		1		74.53	12.37
MC5	L120		4.44695		3.79994					84.2559	7.49718			100		5	L120	1		4.33	3.42	1		3.7	0.467097					2.64		1		82.04	7.3
MC5	L123		5.43703		5.44739					85.6152	3.50041			100		5	L123	1		5.25	3.64	1		5.26	0.486687					3.43		1		82.67	3.38
MC5	L125		5.75139		1.46362					86.2606	6.52443			100		5	L125	1		5.58	3.66	1		1.42	0.506872					2.98		1		83.69	6.33
MC5	L125		0		0					90.6	9.4			100		5	L125	1		1	3.82	1		1	0.527676					1		1		90.6	9.4
MC5	L126		8.41		4.58					80.23	6.78			100		5	L126	1		8.41	3.85	1		4.58	0.54913					1		1		80.23	6.78
MC5	L126		6.34282		0.381601					82.0338	11.2417			100		5	L126	1		6.15	4.2	1		1	0.571262					3.04		1		79.54	10.9
MC5	L127		3.44508		0					87.7211	8.83381			100		5	L127	1		3.35	4.27	1		1	0.594105					2.76		1		85.3	8.59
MC5	L127		7.8		0					83.94	8.26			100		5	L127	1		7.8	4.31	1		1	0.617693					1		1		83.94	8.26
MC5	L128		3.82		0					91.67	4.51			100		5	L128	1		3.82	4.33	1		1	0.64206					1		1		91.67	4.51
MC5	L129		0		0					89.78	10.22			100		5	L129	1		1	4.33	1		1	0.667247					1		1		89.78	10.22
MC5	L130		0		0					91.84	8.16			100		5	L130	1		1	4.36	1		1	0.693291					1		1		91.84	8.16
MC5	L130		1.62984		1.51985					88.4512	8.39916			100		5	L130	1		1.63	4.54	1		1.52	0.720238					1		1		88.46	8.4
MC5	L131		10.08		0					82.41	7.51			100		5	L131	1		10.08	4.67	1		1	0.748133					1		1		82.41	7.51
MC5	L131		1.52		3.71					84.18	10.59			100		5	L131	1		1.52	4.85	1		3.71	0.777024					1		1		84.18	10.59
MC5	L132		0		0					86.3785	13.6215			100		5	L132	5.37		1	4.95	1		1	0.806965					1		1		81.74	12.89
MC5	L132		0		1.30163					76.7859	21.9125			100		5	L132	1		1	5.06	2.42		1.27	0.838012					1		1		74.92	21.38
MC5	L133		0		0					92.0523	7.94765			100		5	L133	6.02		1	5.13	1		1	0.870224					1		1		86.52	7.47
MC5	L133		0		2.41					94.06	3.53			100		5	L133	1		1	5.25	1		2.41	0.903667					1		1		94.06	3.53
MC5	L134		0		0					84.25	15.75			100		5	L134	1		1	5.36	1		1	0.938409					1		1		84.25	15.75
MC5	L134		0		1.39216					92.9471	5.66076			100		5	L134	1		1	5.4	2.31		1.36	0.974527					1		1		90.8	5.53
MC5	L135		0		0					86.52	13.48			100		5	L135	1		1	5.57	1		1	1.0121					1		1		86.52	13.48
MC5	L135		0		10.2684					82.3346	7.397			100		5	L135	1		1	5.58	3.88		9.87	1.05122					1		1		79.14	7.11
MC5	L136		0		0					79.1597	20.8403			100		5	L136	4.8		1	5.7	1		1	1.09197					1		1		75.36	19.84
MC5	L136		0		8.7146					67.6419	23.6435			100		5	L136	1		1	5.74	3.61		8.4	1.13446					1		1		65.2	22.79
MC5	L137		0		0					95.51	4.49			100		5	L137	1		1	5.75	1		1	1.17881					1		1		95.51	4.49
MC5	L137		0		2.23					86.21	11.56			100		5	L137	1		1	5.8	1		2.23	1.08					1		1		86.21	11.56
MC5	L138		6.9707		0					84.5085	8.52085			100		5	L138	1		6.97	5.86	1		1	1.18					1		1		84.5	8.52
MC5	L139		0		0					79.75	20.25			100		5	L139	1		1	6.01	1		1	1.2					1		1		79.75	20.25
MC5	L140		5.57		0					88.19	6.24			100		5	L140	1		5.57	6.03	1		1	1.25					1		1		88.19	6.24
MC5	L141		8.09		0					85.74	6.17			100		5	L141	1		8.09	6.09	1		1	1.27					1		1		85.74	6.17
MC5	L143		6.13		0					79.91	13.96			100		5	L143	1		6.13	6.1	1		1	1.33					1		1		79.91	13.96
MC5	L144		0		0					84.27	15.73			100		5	L144	1		1	6.13	1		1	1.36					1		1		84.27	15.73
MC5	L145		7.72		0					86.46	5.82			100		5	L145	1		7.72	6.15	1		1	1.42					1		1		86.46	5.82
MC5	L146		0		0					87.61	12.39			100		5	L146	1		1	6.28	1		1	1.48					1		1		87.61	12.39
MC5	L146		5.98815		0.950337					81.9742	11.0873			100		5	L146	1		5.86	6.37	1		1	1.52					1		1		80.22	10.85
MC5	L147		4.32957		0					84.0416	11.6288			100		5	L147	1		4.33	6.4	1		1	1.84					1		1		84.05	11.63
MC5	L147		3.91061		0.365668					86.0945	9.62925			100		5	L147	1		3.85	6.55	1.3		1	1.85					1		1		84.76	9.48
MC5	L148		12.1863		0					84.4534	3.3603			100		5	L148	3.57		11.75	6.58	1		1	2.23					1		1		81.43	3.24
MC5	L148		8.5		0					75.23	16.27			100		5	L148	1		8.5	6.68	1		1	2.41					1		1		75.23	16.27
MC5	L158		7.31		0					84.74	7.95			100		5	L158	1		7.31	6.85	1		1	2.43					1		1		84.74	7.95
MC5	L159		5.7		0					87.46	6.84			100		5	L159	1		5.7	6.97	1		1	2.69					1		1		87.46	6.84
MC5	L160		6.1		0.15					88.09	5.66			100		5	L160	1		6.1	7.28	1		1	3.27					1		1		88.09	5.66
MC5	L161		0		4.48182					75.1045	20.4137			100		5	L161	1		1	7.31	1		4.29	3.33					4.29		1		71.89	19.54
MC5	L162		0		0					91.4342	8.56584			100		5	L162	1		1	7.5	1		1	3.48					2.86		1		88.81	8.32
MC5	L163		0		0					78.922	21.078			100		5	L163	1		1	7.53	1		1	3.53					4.44		1		75.41	20.14
MC5	L164		0		0					85.48	14.52			100		5	L164	1		1	7.65	1		1	3.7					1		1		85.48	14.52
MC5	L165		0		0					82.8286	17.1714			100		5	L165	1		1	7.72	1		1	3.71					4.89		1		78.77	16.33
MC5	L166		0		0					81.7613	18.2387			100		5	L166	1		1	7.79	1		1	3.79					4.16		1		78.36	17.48
MC5	L167		0		0					71.3838	28.6162			100		5	L167	1		1	7.8	1		1	3.89					4.32		1		68.3	27.38
MC5	L179		8.93578		3.51373					79.2306	8.31987			100		5	L179	1		8.85	7.95	1		3.48	4.29					1		1		78.47	8.24
MC5	L180		10.6833		4.88233					79.9339	4.50041			100		5	L180	1		10.35	8.09	1		4.73	4.45					3.04		1		77.44	4.36
MC5	L181		7.8413		3.46767					84.1404	4.55066			100		5	L181	1		7.53	8.11	1		3.33	4.58					3.72		1		80.8	4.37
MC5	L182		7.77612		0.224311					80.9015	11.0981			100		5	L182	1.3		7.28	8.39	1		1	4.73					4.04		1		75.74	10.39
MC5	L183		12.9163		0.915903					77.9351	8.23272			100		5	L183	1		12.41	8.41	1		1	5.26					3.38		1		74.88	7.91
MC5	L184		11.7015		1.21976					80.6182	6.46062			100		5	L184	1		11.32	8.5	1		1.18	5.86					3.1		1		77.99	6.25
MC5	L185		11.154		2.80413					82.0494	3.99249			100		5	L185	1		10.7	8.85	1		2.69	6.53					3.04		1		78.71	3.83
MC5	L198		7.65		0					77.78	14.57			100		5	L198	1		7.65	9.32	1		1	6.6					1		1		77.78	14.57
MC5	L199		13.0013		0					79.568	7.43074			100		5	L199	1		13	10.08	1		1	6.7					1		1		79.56	7.43
MC5	L208		7.49925		0					90.9709	1.52985			100		5	L208	1		7.5	10.35	1		1	8.4					1		1		90.98	1.53
MC5	L209		8.11		0					90.12	1.77			100		5	L209	1		8.11	10.7	1		1	9.62					1		1		90.12	1.77
MC5	L210		6.58		0					91.9	1.52			100		5	L210	1		6.58	11.32	1		1	9.87					1		1		91.9	1.52
MC5	L211		4.30957		0					94.1206	1.56984			100		5	L211	1		4.31	11.75	1		1	10.3					1		1		94.13	1.57
MC5	L212		4.54		0					92.39	3.07			100		5	L212	1		4.54	12.25	1		1	12					1		1		92.39	3.07
MC5	L213		6.51317		0					77.5876	15.8992			100		5	L213	3.58		6.28	12.41	1		1	13.25					1		1		74.81	15.33
MC5	L214		0		0					92.72	7.28			100		5	L214	1		1	13	1		1	25.9					1		1		92.72	7.28

## Sheet: 3) Lab&ROS 2 
Gr	No	NaL	MgL	AlL	SiL	PL	SL	ClL	KL	CaL	AsL	SrL	BaL	SumL		MC	No	NaC	NaR	Mg,MgC	MgR	AlC	AlR	SiC	SiR	PC	PR	SC	SR	ClC	ClR	KC	KR	Ca	As	Sr, SrC	SrR	Ba		SumR
MC1	L001		0	1.00579						57.645	2.10302	1.71696	37.5292	100		1	L001	1		1		1	0.0255636	1.56						1		1		56.74	2.07	1.69	0.644324	36.94
MC1	L002		0	0.463056						58.2243	2.55688	1.41937	37.3364	100		1	L002	1		1		1	0.0464345	1						1		1		57.84	2.54	1.41	0.794651	37.09
MC1	L072		0	1.09449						56.1201	1.07441	1.79737	39.9136	100		1	L072	1		1		1.09	0.0697295	1						1		1		55.89	1.07	1.79	0.915424	39.75
MC1	L073		1.15927	2.35887						62.8327	1.16935	2.37903	30.1008	100		1	L073	1		1.15		2.34	0.0966264	1						1		1		62.33	1.16	2.36	1.02437	29.86
MC1	L079		0.27226	0						62.4786	1.94615	2.49067	32.8123	100		1	L079	1		1		1	0.1282	1						1		1		61.96	1.93	2.47	1.41	32.54
MC1	L105		2.51181	1.29047						49.4066	1.26743	1.94723	43.5764	100		1	L105	9.15		2.18		1.12	0.165733	1.72						2.33		1		42.88	1.1	1.69	1.43	37.82
MC1	L141		0	1.11989						56.5243	1.41986	2.10979	38.8261	100		1	L141	1		1		1.12	0.210904	1						1		1		56.53	1.42	2.11	1.56	38.83
MC1	L149		0.15	0						46.88	1.53	4.89	46.55	100		1	L149	1		1		1	0.266016	1						1		1		46.88	1.53	4.89	1.69	46.55
MC1	L151		0.55	4.71						55.55	1.4	3.73	34.06	100		1	L151	1		1		4.71	0.334354	1						1		1		55.55	1.4	3.73	1.69	34.06
MC1	L152		1.87	0						44.86	1.04	0	52.23	100		1	L152	1		1.87		1	0.420796	1						1		1		44.86	1.04	1	1.79	52.23
MC1	L153		0.54	0						64.54	1.26	1.56	32.1	100		1	L153	1		1		1	0.532939	1						1		1		64.54	1.26	1.56	1.85	32.1
MC1	L154		0.26	0						59.37	1.01	1.85	37.51	100		1	L154	1		1		1	1.09	1						1		1		59.37	1.01	1.85	2.11	37.51
MC1	L155		0.251915	0.79605						60.3587	2.04555	1.44095	35.1068	100		1	L155	1		1		1	1.12	1						1		1		59.9	2.03	1.43	2.36	34.84
MC1	L156		0.311245	0.190763						66.3052	1.09438	0.722892	31.3755	100		1	L156	1		1		1	1.12	1						1		1		66.04	1.09	1	2.47	31.25
MC1	L157		0.60429	0.705006						73.24	1.11794	0.725149	23.6076	100		1	L157	1		1		1	2.34	1						1		1		72.72	1.11	1	3.73	23.44
MC1	L203		1.0041	0						58.713	1.53315	0	38.7497	100		1	L203	1		1		1	4.71	1						5.48		1.38		54.38	1.42	1	4.89	35.89
Mean	16		0.592806	0.858399						58.3155	1.47301	1.79871	36.9615	100				1.50937		1.1375		1.33625	0.792331	1.08						1.36312		1.02375		57.4006	1.44875	1.93625	1.89742	36.2938		97.8329	1.02215		58.6721
SD			0.699078	1.18505						6.96341	0.443593	1.20777	6.58732					1.9728		0.341806		0.928291	1.17423	0.213542						1.11045		0.0919834		7.54372	0.443281	1.02372	1.06312	6.39037
Median			0.291752	0.584031						58.4687	1.33371	1.75716	37.4232					1		1		1	0.300185	1						1		1		57.29	1.33	1.69	1.69	36.415
Min			0	0						44.86	1.01	0	23.6076
Max			2.51181	4.71						73.24	2.55688	4.89	52.23
Gr	No	NaL	MgL	AlL	SiL	PL	SL	ClL	KL	CaL	AsL	SrL	BaL	SumL		MC	No	NaC	NaR	Mg,MgC	MgR	AlC	AlR	SiC	SiR	PC	PR	SC	SR	ClC	ClR	KC	KR	Ca	As	Sr, SrC	SrR	Ba		SumR
MC2	L019	0	13.2892					0		16.0817	11.0155	0	59.6137	100		2	L019	1		12.04		2.64		6.76						1	0.694589	1		14.57	9.98	1	0.38118	54.01
MC2	L034	2.02871	10.4557					0		16.7811	1.21723	2.60092	66.9164	100		2	L034	1.95		10.05		3.89		1						1	0.867854	1		16.13	1.17	2.5	0.447418	64.32
MC2	L093	2.82291	8.69212					0		16.7242	4.98578	1.47238	65.3026	100		2	L093	2.78		8.56		1.53		1						1	1.00206	1		16.47	4.91	1.45	0.496166	64.31
MC2	L094	1.63934	8.54078					0		13.4285	2.32746	1.4066	72.6574	100		2	L094	1.62		8.44		1		1						1	1.11832	1		13.27	2.3	1.39	0.536911	71.8
MC2	L095	3.01715	9.66109					0		13.3395	2.50052	2.2112	69.2705	100		2	L095	2.92		9.35		3.22		1						1	1.22423	1		12.91	2.42	2.14	0.572992	67.04
MC2	L096	3.80633	8.9728					0		15.8242	2.39545	2.1011	66.9001	100		2	L096	3.75		8.84		1.27		1						1	1.32353	1		15.59	2.36	2.07	0.606024	65.91
MC2	L097	3.60636	9.47433					0		12.9381	2.45518	2.61817	68.9079	100		2	L097	3.54		9.3		1.84		1						1	1.41839	1		12.7	2.41	2.57	0.636924	67.64
MC2	L098	2.69282	10.3038					0		14.9172	1.69698	1.86973	68.5195	100		2	L098	2.65		10.14		1.52		1						1	1.5102	1		14.68	1.67	1.84	0.666276	67.43
MC2	L114	0	9.19875					6.45161		14.6722	3.08012	1.72737	64.8699	100		2	L114	1		8.84		1		3.9						6.2	1.59995	1		14.1	2.96	1.66	0.694476	62.34
MC2	L115	0	7.30091					7.6578		19.5167	3.15081	1.44795	60.9259	100		2	L115	1		7.16		1		1.92						7.51	1.68834	1		19.14	3.09	1.42	0.72181	59.75
MC2	L117	0.63535	11.1134					6.60348		12.5299	3.3434	1.42693	64.3475	100		2	L117	1		10.67		1		4						6.34	1.77592	1		12.03	3.21	1.37	0.748494	61.78
MC2	L118	0	7.89614					6.61913		14.345	3.51176	1.42599	66.202	100		2	L118	1		7.42		1		6.03						6.22	1.86315	1		13.48	3.3	1.34	0.774696	62.21
MC2	L121	0	8.78239					7.49828		16.2577	2.18986	0	65.2717	100		2	L121	1		7.66		2.48		10.3						6.54	1.95041	1		14.18	1.91	1	0.800553	56.93
MC2	L122	0	7.13					11.43		16.35	2.74	0.93	61.42	100		2	L122	1		7.13		1		1						11.43	2.03802	1		16.35	2.74	1	0.82618	61.42
MC2	L124	0	9.33					6.28		16.97	1.42	1.75	64.25	100		2	L124	1		9.33		1		1						6.28	2.12628	1		16.97	1.42	1.75	0.851676	64.25
MC2	L128	0.743264	10.9838					0		15.6292	4.43894	1.40394	66.8009	100		2	L128	1		10.64		1		1.76						1	2.21546	1		15.14	4.3	1.36	0.877126	64.71
MC2	L129	1.3325	10.3893					0		11.8364	6.27733	0.957735	69.2067	100		2	L129	1.28		9.98		1.4		2.54						1	2.30581	1		11.37	6.03	1	0.90261	66.48
MC2	L138	0.432718	14.1847					0		11.0607	2.3219	1.47757	70.5224	100		2	L138	1		13.44		1.31		3.36						1	2.39759	1		10.48	2.2	1.4	0.928198	66.82
MC2	L139	2.0913	10.5732					0		14.4268	4.83015	1.19958	66.879	100		2	L139	1.97		9.96		2.8		2.62						1	2.49104	1		13.59	4.55	1.13	0.953959	63
MC2	L140	1.53196	11.3048					0		8.75858	2.50396	1.7327	74.168	100		2	L140	1.45		10.7		1.75		2.53						1	2.58642	1.07		8.29	2.37	1.64	0.97996	70.2
MC2	L142	0	12.23					0		20.01	8.06	0	59.7	100		2	L142	1		12.23		1		1						1	2.68398	1		20.01	8.06	1	1.00626	59.7
MC2	L143	0	12.66					0		21.69	1.72	0	63.93	100		2	L143	1		12.66		1		1						1	2.78399	1		21.69	1.72	1	1.01	63.93
MC2	L144	1.63457	9.73451					0		14.5966	5.00781	1.43675	67.5898	100		2	L144	1.57		9.35		1.91		2.02						1	2.88675	1		14.02	4.81	1.38	1.05	64.92
MC2	L145	0.283673	10.3803					0		14.3833	5.58941	0.882538	68.4808	100		2	L145	1		9.88		2.38		2.43						1	2.99254	1		13.69	5.32	1	1.12	65.18
MC2	L153	0	12.5973					0		18.2489	1.284	5.43929	62.4305	100		2	L153	1		12.46		1.09		1						1	3.10171	1		18.05	1.27	5.38	1.13	61.75
MC2	L168	1.2	9.06					0		20.75	2.5	1.87	64.62	100		2	L168	1.2		9.06		1		1						1	3.2146	1		20.75	2.5	1.87	1.18	64.62
MC2	L169	1.10989	10.5789					0		19.1681	2.32977	2.12979	64.6835	100		2	L169	1.11		10.58		1		1						1	3.33163	1		19.17	2.33	2.13	1.34	64.69
MC2	L170	0.510051	10.9711					0		18.4818	1.81018	1.18012	67.0467	100		2	L170	1		10.97		1		1						1	1.61	1		18.48	1.81	1.18	1.36	67.04
MC2	L171	0.33	11.26					0		16.77	1.78	0.94	68.92	100		2	L171	1		11.26		1		1						1	2.93	1		16.77	1.78	1	1.37	68.92
MC2	L172	0	8.62					0		25.72	1.19	1.12	63.35	100		2	L172	1		8.62		1		1						1	2.99	1		25.72	1.19	1.12	1.38	63.35
MC2	L173	1.06	9.57					0		24.92	1.64	1.64	61.17	100		2	L173	1.06		9.57		1		1						1	4.12	1		24.92	1.64	1.64	1.39	61.17
MC2	L174	0	11.2789					0		17.9082	3.21968	1.75982	65.8334	100		2	L174	1		11.28		1		1						1	4.12	1		17.91	3.22	1.76	1.4	65.84
MC2	L175	0.58	10.93					0		16.93	5.07	1.05	65.44	100		2	L175	1		10.93		1		1						1	4.76	1		16.93	5.07	1.05	1.42	65.44
MC2	L176	0.11	8.08					0		17.2	5.06	0	69.55	100		2	L176	1		8.08		1		1						1	4.77	1		17.2	5.06	1	1.45	69.55
MC2	L177	0	8.63086					9.43094		14.7615	12.1312	1.53015	53.5154	100		2	L177	1		8.63		1		1						9.43	6.2	1		14.76	12.13	1.53	1.53	53.51
MC2	L186	0	9.64904					8.56914		16.4984	10.8289	0	54.4546	100		2	L186	1		9.65		1		1						8.57	6.22	1		16.5	10.83	1	1.64	54.46
MC2	L187	0	9.81					8.36		17.01	9.4	0	55.42	100		2	L187	1		9.81		1		1						8.36	6.28	1		17.01	9.4	1	1.64	55.42
MC2	L188	0	9.96					7.49		12.9	6	0	63.65	100		2	L188	1		9.96		1		1						7.49	6.34	1		12.9	6	1	1.64	63.65
MC2	L189	0	10.109					9.73903		12.5787	6.27937	0	61.2939	100		2	L189	1		10.11		1		1						9.74	6.52	1		12.58	6.28	1	1.66	61.3
MC2	L190	0	8.18					8.8		21.7	6.11	0	55.21	100		2	L190	1		8.18		1		1						8.8	6.54	1		21.7	6.11	1	1.66	55.21
MC2	L191	0	9.26093					7.79078		14.1014	12.9813	0.320032	55.5456	100		2	L191	1		9.26		1		1						7.79	6.56	1		14.1	12.98	1	1.75	55.54
MC2	L192	0	8.38255					6.75578		16.6304	9.66739	0.860015	57.7039	100		2	L192	1		8.09		1		3.48						6.52	7.49	1		16.05	9.33	1	1.76	55.69
MC2	L193	0	11					2.99		10.98	11.48	0	63.55	100		2	L193	1		11		1		1						2.99	7.51	1		10.98	11.48	1	1.84	63.55
MC2	L194	0	11.74					4.76		10.9	14.16	0	58.44	100		2	L194	1		11.74		1		1						4.76	7.79	1		10.9	14.16	1	1.87	58.44
MC2	L195	0	8.64					4.12		12.57	9.9	0	64.77	100		2	L195	1		8.64		1		1						4.12	8.36	1		12.57	9.9	1	2.07	64.77
MC2	L196	0	12.6913					4.12041		11.4111	18.5819	0	53.1953	100		2	L196	1		12.69		1		1						4.12	8.57	1		11.41	18.58	1	2.13	53.19
MC2	L197	0	11.32					4.77		12.86	8.5	0	62.55	100		2	L197	1		11.32		1		1						4.77	8.8	1		12.86	8.5	1	2.14	62.55
MC2	L200	0.48	10.39					6.56		13.53	6.7	1.64	60.7	100		2	L200	1		10.39		1		1						6.56	9.43	1		13.53	6.7	1.64	2.5	60.7
MC2	L201	0.76221	9.50757					2.93852		16.0666	5.67646	1.01294	64.0357	100		2	L201	1		9.48		1		1						2.93	9.74	1		16.02	5.66	1.01	2.57	63.85
MC2	L202	0.300661	7.9074					1.61355		24.083	6.03327	1.66366	58.3985	100		2	L202	1		7.89		1		1						1.61	11.43	1		24.03	6.02	1.66	5.38	58.27
Mean	50	0.694835	10.0541					3.02697		15.9549	5.38186	1.1247	63.7626	100				1.297		9.8684		1.3206		1.793						3.5216	4.08546	1.0014		15.693	5.3028	1.4276	1.3158	62.571		98.8365
SD		1.02261	1.54839					3.64809		3.62081	3.93902	1.00456	4.88099					0.664383		1.50564		0.650389		1.75785						3.16186	2.77891	0.0098		3.71806	3.92427	0.703504	0.78801	4.55088
Median		0.055	9.885					0		15.9454	4.63454	1.18985	64.4837					1		9.845		1		1						1	2.96	1		14.95	4.425	1.155	1.155	63.6
Min		0	7.13					0		8.75858	1.19	0	53.1953
Max		3.80633	14.1847					11.43		25.72	18.5819	5.43929	74.168
Gr	No	NaL	MgL	AlL	SiL	PL	SL	ClL	KL	CaL	AsL	SrL	BaL	SumL		MC	No	NaC	NaR	Mg,MgC	MgR	AlC	AlR	SiC	SiR	PC	PR	SC	SR	ClC	ClR	KC	KR	Ca	As	Sr, SrC	SrR	Ba		SumR
MC3	L003		0						0	85.86	8.55	5.59		100		3	L003	1		1		1		1						1		1	0.468114	85.86	8.55	5.59	0.93699
MC3	L004		0.223919						1.50636	95.3282	1.10941	1.83206		100		3	L004	1		1		1		1						1		1.48	0.528544	93.66	1.09	1.8	1.13355
MC3	L005		0.325269						1.38239	91.3905	1.13844	5.76337		100		3	L005	1		1		1.13		1						1		1.36	0.5712	89.91	1.12	5.67	1.27975
MC3	L006		0.420729						1.95998	90.5285	1.72396	5.36685		100		3	L006	1		1		1.06		1						1.09		1.91	0.605762	88.22	1.68	5.23	1.40245
MC3	L007		0.942727						0.93259	91.6574	1.97669	4.49062		100		3	L007	1		1		1		1						1.15		1	0.63558	90.42	1.95	4.43	1.51122
MC3	L008		0.635637						1.3943	92.5774	2.1017	3.29096		100		3	L008	1		1		1.73		1						1		1.36	0.662255	90.3	2.05	3.21	1.01
MC3	L009		0.78553						1.39535	93.1783	1.19897	3.44186		100		3	L009	1		1		1		1						1		1.35	0.686686	90.15	1.16	3.33	1.16
MC3	L010		0						1.11145	84.4601	14.4285	0		100		3	L010	1		1		1		1						1.06		1.09	0.709436	82.83	14.15	1	1.64
MC3	L011		0.811606						1.1261	84.9549	13.1074	0		100		3	L011	1		1		1		1						1		1.11	0.730882	83.74	12.92	1	1.71
MC3	L012		1.03824						2.33347	87.5514	1.0588	8.01809		100		3	L012	1		1.01		1.56		1						1.17		2.27	0.751293	85.17	1.03	7.8	1.8
MC3	L013		1.32006						1.71608	83.0524	2.88383	11.0276		100		3	L013	1		1.3		1		1						1.52		1.69	0.770865	81.79	2.84	10.86	2.07
MC3	L014		0.594998						1.43203	87.3235	3.11618	7.53328		100		3	L014	1		1		1		1						1		1.42	0.789749	86.59	3.09	7.47	2.16
MC3	L015		0.40201						1.19598	89.2362	2.50251	6.66332		100		3	L015	1		1		1		1						1		1.19	0.808064	88.79	2.49	6.63	2.23
MC3	L016		0						1.13756	92.3847	1.8538	4.62397		100		3	L016	1		1		1		1						1		1.08	0.825905	87.71	1.76	4.39	2.34
MC3	L017		0						0.878845	92.8228	3.38983	2.90856		100		3	L017	1		1		1		1						1		1	0.843349	88.72	3.24	2.78	2.64
MC3	L018		0						2.08658	86.3179	4.2043	7.39126		100		3	L018	1		1		1		1						1		2.01	0.860461	83.15	4.05	7.12	2.64
MC3	L042		0						1.07516	88.8565	1.82878	8.23955		100		3	L042	1		1		1		1						1		1.07	0.877297	88.43	1.82	8.2	2.74
MC3	L043		0						1.18379	86.3664	1.02327	11.4266		100		3	L043	1		1		1		1						1		1.18	0.893904	86.09	1.02	11.39	2.78
MC3	L044		0.11						0.51	89.01	1.1	9.27		100		3	L044	1		1		1		1						1		1	0.910323	89.01	1.1	9.27	2.79
MC3	L045		0						0.922861	91.2729	1.53476	6.26944		100		3	L045	1		1		1		1						1		1	0.926592	90.99	1.53	6.25	2.83
MC3	L046		0						0	89.76	6.27	3.97		100		3	L046	1		1		1		1						1		1	0.942742	89.76	6.27	3.97	2.98
MC3	L047		0						1.03	90.57	2.01	6.39		100		3	L047	1		1		1		1						1		1.03	0.958803	90.57	2.01	6.39	3.21
MC3	L048		0.874727						0	89.5658	3.5718	5.98771		100		3	L048	1		1		1		1						1		1	1.03	86.01	3.43	5.75	3.33
MC3	L049		0						0	95.9767	1.27872	2.74457		100		3	L049	1		1		1		1						1		1	1.04	92.32	1.23	2.64	3.74
MC3	L050		1.01341						0	93.1278	2.87132	2.98744		100		3	L050	1		1		1		1						1		1	1.05	88.22	2.72	2.83	3.86
MC3	L053		0						0	92.8985	1.63313	5.46834		100		3	L053	1		1		5.09		1						1		1	1.05	88.17	1.55	5.19	3.88
MC3	L054		1.13408						1.32477	91.7804	1.47531	4.28543		100		3	L054	1		1.13		1		1						1		1.32	1.07	91.45	1.47	4.27	3.89
MC3	L055		0.592965						1.20603	92.8141	1.48744	3.8995		100		3	L055	1		1		1		1						1		1.2	1.08	92.35	1.48	3.88	3.97
MC3	L056		0.602164						1.06144	93.019	1.34721	3.9702		100		3	L056	2.02		1		1		1						1		1.04	1.09	91.14	1.32	3.89	4.18
MC3	L057		0.141614						1.42626	93.688	2.3771	2.36698		100		3	L057	1.14		1		1		1						1		1.41	1.11	92.62	2.35	2.34	4.27
MC3	L058		1.08838						1.76317	78.8093	1.08838	17.2508		100		3	L058	5.69		1		1		1						2.42		1.62	1.12	72.41	1	15.85	4.39
MC3	L059		0						1.05549	89.4853	1.83957	7.61962		100		3	L059	1		1		1		1						1		1.05	1.12	89.02	1.83	7.58	4.43
MC3	L060		0.273141						1.50733	89.0946	1.56803	7.5569		100		3	L060	1.15		1		1		1						1		1.49	1.18	88.07	1.55	7.47	4.53
MC3	L061		0.33						1.52	89.49	1.39	7.27		100		3	L061	1		1		1		1						1		1.52	1.18	89.49	1.39	7.27	4.55
MC3	L062		0						1.15726	91.0415	2.58318	5.21802		100		3	L062	3.22		1		1		1						1		1.12	1.18	88.11	2.5	5.05	4.67
MC3	L063		0.22496						1.26406	88.902	2.05678	7.55222		100		3	L063	1		1		1		1						1		1.18	1.19	82.99	1.92	7.05	5.05
MC3	L064		0.515308						1.32363	88.734	1.38426	8.04284		100		3	L064	1		1		1		1						1		1.31	1.2	87.82	1.37	7.96	5.19
MC3	L066		0.66						0	86.83	2.31	10.2		100		3	L066	1		1		1		1						1		1	1.23	86.83	2.31	10.2	5.23
MC3	L067		0						2.19318	85.844	2.7027	9.26008		100		3	L067	1		1		1		1						1		1.98	1.31	77.5	2.44	8.36	5.23
MC3	L068		0						0	88.9	1.97	9.13		100		3	L068	1		1		1		1						1		1	1.32	88.9	1.97	9.13	5.26
MC3	L069		1.45734						1.53521	85.5268	1.86895	9.61175		100		3	L069	4.18		1.31		1		1						4.76		1.38	1.33	76.88	1.68	8.64	5.59
MC3	L070		2.00514						2.48197	85.5239	1.27155	8.71745		100		3	L070	5.96		1.64		1		1						3.13		2.03	1.33	69.95	1.04	7.13	5.67
MC3	L071		1.57196						2.59665	86.6791	1.17606	7.97625		100		3	L071	4.32		1.35		1		1						2.7		2.23	1.35	74.44	1.01	6.85	5.75
MC3	L074		0						0	92.15	2.62	5.23		100		3	L074	1		1		1		1						1		1	1.36	92.15	2.62	5.23	6.25
MC3	L075		0						0	84.4696	1.8844	13.646		100		3	L075	1		1		1		1						5.54		1	1.36	79.79	1.78	12.89	6.34
MC3	L076		0						0	90.439	5.38054	4.18042		100		3	L076	1		1		1		1						1		1	1.38	90.43	5.38	4.18	6.39
MC3	L077		1.08011						1.05011	92.1292	1.21012	4.53045		100		3	L077	1		1.08		1		1						1		1.05	1.41	92.12	1.21	4.53	6.43
MC3	L078		0						0.669933	94.6805	1.66983	2.9797		100		3	L078	1		1		1		1						1		1	1.42	94.69	1.67	2.98	6.63
MC3	L081		0						1.7831	92.892	2.68686	2.63801		100		3	L081	1		1		1		1						1.56		1.46	1.46	76.06	2.2	2.16	6.85
MC3	L082		0						2.17226	92.6067	2.38821	2.83283		100		3	L082	1		1		1.44		4.87						1.65		1.71	1.48	72.9	1.88	2.23	7.05
MC3	L083		0.791526						2.3513	91.9567	2.49098	2.4095		100		3	L083	1.16		1		1		1						1.13		2.02	1.49	79	2.14	2.07	7.12
MC3	L084		0.991718						1.97254	93.5157	1.6565	1.86356		100		3	L084	1.44		1		1.02		2.31						1.33		1.81	1.52	85.81	1.52	1.71	7.13
MC3	L085		1.14723						3.97945	90.9895	1.924	1.95985		100		3	L085	3.19		1		1.51		2.82						1.79		3.33	1.55	76.14	1.61	1.64	7.27
MC3	L086		0						2.20776	95.3392	1.66382	0.789249		100		3	L086	1		1		1		1						1		2.07	1.62	89.39	1.56	1	7.47
MC3	L087		0						1.43961	95.5758	1.62687	1.35768		100		3	L087	1.13		1		1.3		8.15						1		1.23	1.69	81.66	1.39	1.16	7.47
MC3	L088		0						1.10797	96.4274	1.32278	1.14189		100		3	L088	1.68		1		2.24		5.56						1		1	1.71	85.29	1.17	1.01	7.58
MC3	L089		0.370999						1.88679	95.3996	1.79139	0.551198		100		3	L089	2.3		1		1		1						1		1.78	1.78	90	1.69	1	7.63
MC3	L090		0						1.15762	92.1344	3.97933	2.72868		100		3	L090	1		1		1		1						1		1.12	1.78	89.14	3.85	2.64	7.8
MC3	L091		0						1.3559	92.4763	3.32348	2.84433		100		3	L091	1		1		1		1						1		1.33	1.81	90.71	3.26	2.79	7.96
MC3	L092		0						1.22356	89.465	6.47034	2.84114		100		3	L092	1		1		1		1						1		1.18	1.9	86.28	6.24	2.74	8.2
MC3	L149		1.66983						1.77982	94.6005	1.38986	0.559944		100		3	L149	1		1.67		1		1						1		1.78	1.91	94.61	1.39	1	8.36
MC3	L150		1.19988						0	93.2807	1.77982	3.73963		100		3	L150	1		1.2		1		1						1		1	1.98	93.29	1.78	3.74	8.64
MC3	L152		2.30912						0	88.0405	2.7448	6.90557		100		3	L152	1		2.12		1		1						1		1	2.01	80.83	2.52	6.34	9.13
MC3	L154		0.31						0	90.58	4.44	4.67		100		3	L154	1		1		1		1						1		1	2.02	90.58	4.44	4.67	9.27
MC3	L204		0						0	90.9994	2.41655	6.58407		100		3	L204	1		1		1		1						1		1	2.03	88.87	2.36	6.43	10.2
MC3	L205		0						0	94.61	1.53	3.86		100		3	L205	1		1		1		1						1		1	2.07	94.61	1.53	3.86	10.86
MC3	L206		0.269973						1.32987	91.0909	2.0498	5.25947		100		3	L206	1		1		1		1						1		1.33	2.23	91.1	2.05	5.26	11.14
MC3	L207		0.58						1.55	85.65	1.08	11.14		100		3	L207	1		1		1		1						1		1.55	2.27	85.65	1.08	11.14	11.39
MC3	L150		2.4522						3.46765	87.4797	1.68521	4.9152		100		3	L150	1		2.27		1		1						1		3.21	3.21	80.98	1.56	4.55	12.89
MC3	L151		0.51						1.9	88.36	1.6	7.63		100		3	L151	1		1		1		1						1		1.9	3.33	88.36	1.6	7.63	15.85
Mean	70		0.48255						1.20161	90.279	2.6024	5.43445		100				1.35114		1.07257		1.11543		1.26729						1.24286		1.37629	1.3014	86.6713	2.51371	5.28129	5.29934			95.7857
SD			0.598415						0.855735	3.47509	2.34569	3.32353						1.01627		0.23081		0.517468		1.11433						0.773521		0.484998	0.556507	5.64323	2.32217	3.1266	3.10293
Median			0.271557						1.21479	90.7847	1.86138	5.06661						1		1		1		1						1		1.185	1.185	88.29	1.78	4.86	4.86
Min			0						0	78.8093	1.02327	0
Max			2.4522						3.97945	96.4274	14.4285	17.2508
Gr	No	NaL	MgL	AlL	SiL	PL	SL	ClL	KL	CaL	AsL	SrL	BaL	SumL		MC	No	NaC	NaR	Mg,MgC	MgR	AlC	AlR	SiC	SiR	PC	PR	SC	SR	ClC	ClR	KC	KR	Ca	As	Sr, SrC	SrR	Ba		SumR
MC4	T001	4.2	0					6.3	1.6	71.2	11.2	5.5		100		4	T001	4.2	0.425143	1	0.210195	1		1						6.3	1.33182	1.6	0.276391	71.2	11.2	5.5
MC4	T002	4.1041	3.3033					6.80681	1.3013	68.6687	9.70971	6.10611		100		4	T002	4.1	0.58999	3.3	0.281746	1		1						6.8	1.68391	1.3	0.349708	68.6	9.7	6.1
MC4	T003	7.2	4.3					12	0	65.3	5.5	5.7		100		4	T003	7.2	0.729703	4.3	0.341314	1		1						12	2.2	1	0.407879	65.3	5.5	5.7
MC4	T004	22.8	2.2					19.9	1.2	43.4	8	2.5		100		4	T004	22.8	1.1	2.2	0.395833	1		1						19.9	2.2	1.2	0.459323	43.4	8	2.5
MC4	T005	26.5265	2.1021					29.1291	0.800801	32.8328	6.80681	1.8018		100		4	T005	26.5	1.2	2.1	0.447896	1		1						29.1	2.3	1	0.507102	32.8	6.8	1.8
MC4	T006	27	3.4					28.3	1.4	32.2	5.4	2.3		100		4	T006	27	1.2	3.4	0.498836	1		1						28.3	3.8	1.4	0.552748	32.2	5.4	2.3
MC4	T007	13	4.3					13.9	2.1	55.3	8	3.4		100		4	T007	13	1.4	4.3	0.549478	1		1						13.9	4.2	2.1	0.59717	55.3	8	3.4
MC4	T008	3	0.2					5	0	71.3	13.8	6.7		100		4	T008	3	1.7	1	0.600404	1		1						5	4.3	1	0.640978	71.3	13.8	6.7
MC4	T009	3.50701	0.501002					4.20842	1.1022	76.8537	7.91583	5.91182		100		4	T009	3.5	1.9	1	0.652066	1		1						4.2	4.5	1.1	0.684617	76.7	7.9	5.9
MC4	T010	2.8	0.2					6	1.6	70.2	13.4	5.8		100		4	T010	2.8	1.9	1	0.704851	1		1						6	4.6	1.6	0.728443	70.2	13.4	5.8
MC4	T011	2.6	0.1					4.5	1	73.6	13.8	4.4		100		4	T011	2.6	2.5	1	0.759109	1		1						4.5	4.6	1	0.772754	73.6	13.8	4.4
MC4	T012	6.4	2.2					9.8	3	61.5	9.6	7.5		100		4	T012	6.4	2.6	2.2	0.815181	1		1						9.8	5	3	0.817821	61.5	9.6	7.5
MC4	T013	7.9	2.3					11.1	3	60.1	8.8	6.8		100		4	T013	7.9	2.8	2.3	0.873411	1		1						11.1	5.5	3	0.863897	60.1	8.8	6.8
MC4	T014	4.1	0.3					7.2	1.4	65.2	15.8	6		100		4	T014	4.1	3	1	0.934162	1		1						7.2	5.6	1.4	0.911234	65.2	15.8	6
MC4	T015	2.4975	0.0999001					5.59441	0.599401	68.6314	17.4825	5.09491		100		4	T015	2.5	3.3	1	0.997826	1		1						5.6	5.8	1	1.1	68.7	17.5	5.1
MC4	T016	4.6	0.8					6.4	0.8	69.3	12	6.1		100		4	T016	4.6	3.5	1	1.06484	1		1						6.4	6	1	1.1	69.3	12	6.1
MC4	T017	4	1.9					9.7	1	69.8	6.4	7.2		100		4	T017	4	4	1.9	1.1357	1		1						9.7	6.3	1	1.1	69.8	6.4	7.2
MC4	T018	6.10611	2.1021					8.20821	1.6016	66.8669	8.20821	6.90691		100		4	T018	6.1	4.1	2.1	1.21097	1		1						8.2	6.4	1.6	1.2	66.8	8.2	6.9
MC4	T019	9.10952	3.5824					15.4555	2.55885	52.5077	7.3695	9.41658		100		4	T019	8.9	4.1	3.5	1.29133	1		1						15.1	6.8	2.5	1.3	51.3	7.2	9.2
MC4	T020	4.3	0					8.6	2.1	62.2	19.6	3.2		100		4	T020	4.3	4.1	1	1.37756	1		1						8.6	7.2	2.1	1.4	62.2	19.6	3.2
MC4	T021	4.8	0					9.3	2	66.2	13.9	3.8		100		4	T021	4.8	4.2	1	1.47063	1		1						9.3	7.8	2	1.4	66.2	13.9	3.8
MC4	T022	4.1041	0.4004					7.80781	2.4024	68.8689	8.50851	7.90791		100		4	T022	4.1	4.3	1	1.57172	1		1						7.8	8.2	2.4	1.4	68.8	8.5	7.9
MC4	T023	1.2	0					4.3	1.1	75.4	11.6	6.4		100		4	T023	1.2	4.6	1	1.9	1		1						4.3	8.6	1.1	1.6	75.4	11.6	6.4
MC4	T024	1.4	0					5.5	1.4	69.3	14.1	8.3		100		4	T024	1.4	4.8	1	2.1	1		1						5.5	9.3	1.4	1.6	69.3	14.1	8.3
MC4	T025	1.9	0.5					4.6	1.1	72.9	12.1	6.9		100		4	T025	1.9	6.1	1	2.1	1		1						4.6	9.7	1.1	1.6	72.9	12.1	6.9
MC4	T026	1.9	1					4.6	1.8	72.7	9.7	8.3		100		4	T026	1.9	6.4	1	2.2	1		1						4.6	9.8	1.8	1.8	72.7	9.7	8.3
MC4	T027	1.2012	0.2002					3.8038	0.900901	74.1742	13.1131	6.60661		100		4	T027	1.2	7.2	1	2.2	1		1						3.8	11.1	1	2	74.1	13.1	6.6
MC4	T028	10.7527	8.60215					17.3118	6.98925	28.7097	3.44086	24.1935		100		4	T028	10	7.9	8	2.3	1		1						16.1	12	6.5	2.1	26.7	3.2	22.5
MC4	T029	0	0					0	0	80	17.1	2.9		100		4	T029	1	8.9	1	3.3	1		1						1	13.9	1	2.1	80	17.1	2.9
MC4	T030	0	0					2.2	0	82.4	12.1	3.3		100		4	T030	1	10	1	3.4	1		1						2.2	15.1	1	2.4	82.4	12.1	3.3
MC4	T031	1.21413	0					2.53863	0	80.2428	14.2384	1.766		100		4	T031	1.1	13	1	3.5	4.7		4.7						2.3	16.1	1	2.5	72.7	12.9	1.6
MC4	T032	1.6983	0					2.1978	0	80.3197	13.0869	2.6973		100		4	T032	1.7	22.8	1	4.3	1		1						2.2	19.9	1	3	80.4	13.1	2.7
MC4	T033	0	0					0	0	89	8.9	2.1		100		4	T033	1	26.5	1	4.3	1		1						1	28.3	1	3	89	8.9	2.1
MC4	T034	3.3	0					5.8	0	70.7	17.4	2.8		100		4	T034	3.3	27	1	8	1		1						5.8	29.1	1	6.5	70.7	17.4	2.8
Mean	34	5.85945	1.31158					8.47242	1.34873	66.114	11.12	5.77381		100				5.91471	5.87779	1.81176	1.69956	1.10882		1.10882						8.47647	8.50634	1.59412	1.43441	65.7882	11.0676	5.71176				100.086
SD		6.777	1.86093					6.74557	1.30796	13.8158	3.85793	3.83527						6.68885	6.71707	1.47005	1.56489	0.625144		0.625144						6.62478	6.5922	1.0324	1.14316	13.846	3.85378	3.59826
Median		4.05	0.3502					6.35	1.1511	69.3	11.4	5.85591						4.05	4.05	1	1.17334	1		1						6.35	6.35	1.15	1.15	69.3	11.4	5.85
Min		0	0					0	0	28.7097	3.44086	1.766
Max		27	8.60215					29.1291	6.98925	89	19.6	24.1935
Gr	No	NaL	MgL	AlL	SiL	PL	SL	ClL	KL	CaL	AsL	SrL	BaL	SumL		MC	No	NaC	NaR	Mg,MgC	MgR	AlC	AlR	SiC	SiR	PC	PR	SC	SR	ClC	ClR	KC	KR	Ca	As	Sr, SrC	SrR	Ba		SumR
MC5	L024		4.36		10.3					80.53	4.81			100		5	L024	1		4.36	1.27916	1		10.3	0.0280795					1		1		80.53	4.81
MC5	L025		4.26309		4.51685					89.4032	1.81689			100		5	L025	1		4.2	1.48762	1		4.45	0.0421206					1.45		1		88.08	1.79
MC5	L026		5.2343		26.7922					61.5082	6.46529			100		5	L026	1		5.06	1.63715	2.49		25.9	0.054483					1		1		59.46	6.25
MC5	L027		5.094		3.98067					87.3018	3.62357			100		5	L027	1		4.85	1.75945	2.37		3.79	0.0661238					1.84		1		83.12	3.45
MC5	L028		0		6.53					77.23	16.24			100		5	L028	1		1	1.86564	1		6.53	0.0774068					1		1		77.23	16.24
MC5	L029		0		9.7329					84.2574	6.00971			100		5	L029	1		1	1.96104	1		9.62	0.0885171					1.15		1		83.28	5.94
MC5	L030		3.7464		13.6373					81.4739	1.14245			100		5	L030	1		3.64	2.04869	1.94		13.25	0.0995654					1		1		79.16	1.11
MC5	L031		3.53744		12.4121					82.5714	1.47911			100		5	L031	1		3.42	2.13049	3.32		12	0.110625					1		1		79.83	1.43
MC5	L032		8.85021		0					89.5886	1.56118			100		5	L032	2.15		8.39	2.20771	2.23		1	0.121749					1		1		84.93	1.48
MC5	L033		6.67626		0					89.6368	3.68689			100		5	L033	7.22		6.03	2.28125	2.08		1	0.132976					1		1		80.96	3.33
MC5	L035		5.2654		0.946708					91.0116	2.7763			100		5	L035	5.98		4.95	2.3518	1		1	0.14434					1		1		85.56	2.61
MC5	L036		4.84742		1.9099					88.3434	4.89931			100		5	L036	3.65		4.67	2.41985	1		1.84	0.155865					1		1		85.11	4.72
MC5	L037		6.27414		1.12747					84.3721	8.22633			100		5	L037	4.21		6.01	2.48581	1		1.08	0.167575					1		1		80.82	7.88
MC5	L038		5.28104		4.00453					85.2069	5.50751			100		5	L038	2.87		5.13	2.55001	1		3.89	0.17949					1		1		82.77	5.35
MC5	L039		5.71066		2.5698					89.7737	1.94585			100		5	L039	3.49		5.4	2.61269	1.95		2.43	0.19163					1		1		84.89	1.84
MC5	L040		4.42166		3.38614					89.1271	3.06513			100		5	L040	1		4.27	2.67408	2.77		3.27	0.20401					1		1		86.07	2.96
MC5	L041		3.53588		6.94732					78.8158	10.701			100		5	L041	1.45		3.41	2.73437	2.11		6.7	0.216648					1		1		76.01	10.32
MC5	L099		6.60951		0					91.4261	1.9644			100		5	L099	5.16		6.09	2.7937	2.41		1	0.22956					1		1		84.24	1.81
MC5	L100		6.98161		0					91.4193	1.59908			100		5	L100	4.12		6.68	2.85221	1		1	0.24276					1		1		87.47	1.53
MC5	L101		6.7539		0					91.5682	1.67792			100		5	L101	5.06		6.4	2.91003	1		1	0.256266					1		1		86.77	1.59
MC5	L102		12.9015		6.95103					72.0484	8.099			100		5	L102	4		12.25	2.96724	1		6.6	0.270091					1		1		68.41	7.69
MC5	L103		9.56781		6.01581					73.6475	10.7689			100		5	L103	2.52		9.32	3.02396	1		5.86	0.284253					1		1		71.74	10.49
MC5	L106		6.25202		1.59534					87.9056	4.24706			100		5	L106	3.33		5.8	3.08025	2.97		1.48	0.298766					1		1		81.55	3.94
MC5	L107		8.97899		0.451773					84.8769	5.69234			100		5	L107	8.57		7.95	3.13619	1.6		1	0.313647					1.29		1		75.15	5.04
MC5	L108		4.19821		0.630879					93.1865	1.9844			100		5	L108	8.93		3.66	3.19185	1.19		1	0.328912					1		1		81.24	1.73
MC5	L109		8.65556		0.722222					87.9222	2.7			100		5	L109	7.84		7.79	3.2473	1.72		1	0.34458					1		1		79.13	2.43
MC5	L110		6.17881		1.34322					86.5248	5.95315			100		5	L110	4.97		5.75	3.30259	1.06		1.25	0.360667					1		1		80.52	5.54
MC5	L111		6.77011		0.371984					84.1641	8.6938			100		5	L111	3.62		6.37	3.35777	1.54		1	0.377192					1		1		79.19	8.18
MC5	L112		5.59149		1.38744					87.5652	5.45587			100		5	L112	2.52		5.36	1.52	1.3		1.33	0.394175					1		1		83.94	5.23
MC5	L113		7.12809		2.01328					89.1392	1.71945			100		5	L113	6.2		6.55	1.63	1.14		1.85	0.411636					1		1		81.91	1.58
MC5	L116		5.74		1.2					90.38	2.68			100		5	L116	1		5.74	3.35	1		1.2	0.429594					1		1		90.38	2.68
MC5	L119		7.04153		3.6287					76.6139	12.7159			100		5	L119	1		6.85	3.41	1		3.53	0.448074					2.71		1		74.53	12.37
MC5	L120		4.44695		3.79994					84.2559	7.49718			100		5	L120	1		4.33	3.42	1		3.7	0.467097					2.64		1		82.04	7.3
MC5	L123		5.43703		5.44739					85.6152	3.50041			100		5	L123	1		5.25	3.64	1		5.26	0.486687					3.43		1		82.67	3.38
MC5	L125		5.75139		1.46362					86.2606	6.52443			100		5	L125	1		5.58	3.66	1		1.42	0.506872					2.98		1		83.69	6.33
MC5	L125		0		0					90.6	9.4			100		5	L125	1		1	3.82	1		1	0.527676					1		1		90.6	9.4
MC5	L126		8.41		4.58					80.23	6.78			100		5	L126	1		8.41	3.85	1		4.58	0.54913					1		1		80.23	6.78
MC5	L126		6.34282		0.381601					82.0338	11.2417			100		5	L126	1		6.15	4.2	1		1	0.571262					3.04		1		79.54	10.9
MC5	L127		3.44508		0					87.7211	8.83381			100		5	L127	1		3.35	4.27	1		1	0.594105					2.76		1		85.3	8.59
MC5	L127		7.8		0					83.94	8.26			100		5	L127	1		7.8	4.31	1		1	0.617693					1		1		83.94	8.26
MC5	L128		3.82		0					91.67	4.51			100		5	L128	1		3.82	4.33	1		1	0.64206					1		1		91.67	4.51
MC5	L129		0		0					89.78	10.22			100		5	L129	1		1	4.33	1		1	0.667247					1		1		89.78	10.22
MC5	L130		0		0					91.84	8.16			100		5	L130	1		1	4.36	1		1	0.693291					1		1		91.84	8.16
MC5	L130		1.62984		1.51985					88.4512	8.39916			100		5	L130	1		1.63	4.54	1		1.52	0.720238					1		1		88.46	8.4
MC5	L131		10.08		0					82.41	7.51			100		5	L131	1		10.08	4.67	1		1	0.748133					1		1		82.41	7.51
MC5	L131		1.52		3.71					84.18	10.59			100		5	L131	1		1.52	4.85	1		3.71	0.777024					1		1		84.18	10.59
MC5	L132		0		0					86.3785	13.6215			100		5	L132	5.37		1	4.95	1		1	0.806965					1		1		81.74	12.89
MC5	L132		0		1.30163					76.7859	21.9125			100		5	L132	1		1	5.06	2.42		1.27	0.838012					1		1		74.92	21.38
MC5	L133		0		0					92.0523	7.94765			100		5	L133	6.02		1	5.13	1		1	0.870224					1		1		86.52	7.47
MC5	L133		0		2.41					94.06	3.53			100		5	L133	1		1	5.25	1		2.41	0.903667					1		1		94.06	3.53
MC5	L134		0		0					84.25	15.75			100		5	L134	1		1	5.36	1		1	0.938409					1		1		84.25	15.75
MC5	L134		0		1.39216					92.9471	5.66076			100		5	L134	1		1	5.4	2.31		1.36	0.974527					1		1		90.8	5.53
MC5	L135		0		0					86.52	13.48			100		5	L135	1		1	5.57	1		1	1.0121					1		1		86.52	13.48
MC5	L135		0		10.2684					82.3346	7.397			100		5	L135	1		1	5.58	3.88		9.87	1.05122					1		1		79.14	7.11
MC5	L136		0		0					79.1597	20.8403			100		5	L136	4.8		1	5.7	1		1	1.09197					1		1		75.36	19.84
MC5	L136		0		8.7146					67.6419	23.6435			100		5	L136	1		1	5.74	3.61		8.4	1.13446					1		1		65.2	22.79
MC5	L137		0		0					95.51	4.49			100		5	L137	1		1	5.75	1		1	1.17881					1		1		95.51	4.49
MC5	L137		0		2.23					86.21	11.56			100		5	L137	1		1	5.8	1		2.23	1.08					1		1		86.21	11.56
MC5	L138		6.9707		0					84.5085	8.52085			100		5	L138	1		6.97	5.86	1		1	1.18					1		1		84.5	8.52
MC5	L139		0		0					79.75	20.25			100		5	L139	1		1	6.01	1		1	1.2					1		1		79.75	20.25
MC5	L140		5.57		0					88.19	6.24			100		5	L140	1		5.57	6.03	1		1	1.25					1		1		88.19	6.24
MC5	L141		8.09		0					85.74	6.17			100		5	L141	1		8.09	6.09	1		1	1.27					1		1		85.74	6.17
MC5	L143		6.13		0					79.91	13.96			100		5	L143	1		6.13	6.1	1		1	1.33					1		1		79.91	13.96
MC5	L144		0		0					84.27	15.73			100		5	L144	1		1	6.13	1		1	1.36					1		1		84.27	15.73
MC5	L145		7.72		0					86.46	5.82			100		5	L145	1		7.72	6.15	1		1	1.42					1		1		86.46	5.82
MC5	L146		0		0					87.61	12.39			100		5	L146	1		1	6.28	1		1	1.48					1		1		87.61	12.39
MC5	L146		5.98815		0.950337					81.9742	11.0873			100		5	L146	1		5.86	6.37	1		1	1.52					1		1		80.22	10.85
MC5	L147		4.32957		0					84.0416	11.6288			100		5	L147	1		4.33	6.4	1		1	1.84					1		1		84.05	11.63
MC5	L147		3.91061		0.365668					86.0945	9.62925			100		5	L147	1		3.85	6.55	1.3		1	1.85					1		1		84.76	9.48
MC5	L148		12.1863		0					84.4534	3.3603			100		5	L148	3.57		11.75	6.58	1		1	2.23					1		1		81.43	3.24
MC5	L148		8.5		0					75.23	16.27			100		5	L148	1		8.5	6.68	1		1	2.41					1		1		75.23	16.27
MC5	L158		7.31		0					84.74	7.95			100		5	L158	1		7.31	6.85	1		1	2.43					1		1		84.74	7.95
MC5	L159		5.7		0					87.46	6.84			100		5	L159	1		5.7	6.97	1		1	2.69					1		1		87.46	6.84
MC5	L160		6.1		0.15					88.09	5.66			100		5	L160	1		6.1	7.28	1		1	3.27					1		1		88.09	5.66
MC5	L161		0		4.48182					75.1045	20.4137			100		5	L161	1		1	7.31	1		4.29	3.33					4.29		1		71.89	19.54
MC5	L162		0		0					91.4342	8.56584			100		5	L162	1		1	7.5	1		1	3.48					2.86		1		88.81	8.32
MC5	L163		0		0					78.922	21.078			100		5	L163	1		1	7.53	1		1	3.53					4.44		1		75.41	20.14
MC5	L164		0		0					85.48	14.52			100		5	L164	1		1	7.65	1		1	3.7					1		1		85.48	14.52
MC5	L165		0		0					82.8286	17.1714			100		5	L165	1		1	7.72	1		1	3.71					4.89		1		78.77	16.33
MC5	L166		0		0					81.7613	18.2387			100		5	L166	1		1	7.79	1		1	3.79					4.16		1		78.36	17.48
MC5	L167		0		0					71.3838	28.6162			100		5	L167	1		1	7.8	1		1	3.89					4.32		1		68.3	27.38
MC5	L179		8.93578		3.51373					79.2306	8.31987			100		5	L179	1		8.85	7.95	1		3.48	4.29					1		1		78.47	8.24
MC5	L180		10.6833		4.88233					79.9339	4.50041			100		5	L180	1		10.35	8.09	1		4.73	4.45					3.04		1		77.44	4.36
MC5	L181		7.8413		3.46767					84.1404	4.55066			100		5	L181	1		7.53	8.11	1		3.33	4.58					3.72		1		80.8	4.37
MC5	L182		7.77612		0.224311					80.9015	11.0981			100		5	L182	1.3		7.28	8.39	1		1	4.73					4.04		1		75.74	10.39
MC5	L183		12.9163		0.915903					77.9351	8.23272			100		5	L183	1		12.41	8.41	1		1	5.26					3.38		1		74.88	7.91
MC5	L184		11.7015		1.21976					80.6182	6.46062			100		5	L184	1		11.32	8.5	1		1.18	5.86					3.1		1		77.99	6.25
MC5	L185		11.154		2.80413					82.0494	3.99249			100		5	L185	1		10.7	8.85	1		2.69	6.53					3.04		1		78.71	3.83
MC5	L198		7.65		0					77.78	14.57			100		5	L198	1		7.65	9.32	1		1	6.6					1		1		77.78	14.57
MC5	L199		13.0013		0					79.568	7.43074			100		5	L199	1		13	10.08	1		1	6.7					1		1		79.56	7.43
MC5	L208		7.49925		0					90.9709	1.52985			100		5	L208	1		7.5	10.35	1		1	8.4					1		1		90.98	1.53
MC5	L209		8.11		0					90.12	1.77			100		5	L209	1		8.11	10.7	1		1	9.62					1		1		90.12	1.77
MC5	L210		6.58		0					91.9	1.52			100		5	L210	1		6.58	11.32	1		1	9.87					1		1		91.9	1.52
MC5	L211		4.30957		0					94.1206	1.56984			100		5	L211	1		4.31	11.75	1		1	10.3					1		1		94.13	1.57
MC5	L212		4.54		0					92.39	3.07			100		5	L212	1		4.54	12.25	1		1	12					1		1		92.39	3.07
MC5	L213		6.51317		0					77.5876	15.8992			100		5	L213	3.58		6.28	12.41	1		1	13.25					1		1		74.81	15.33
MC5	L214		0		0					92.72	7.28			100		5	L214	1		1	13	1		1	25.9					1		1		92.72	7.28
Mean	97		4.77162		2.1165					84.7297	8.38219			100				1.98454		4.91299	5.34959	1.27536		2.5833	2.26825					1.4801		1		82.4578	8.18165					98.2573
SD			3.70753		3.88067					6.06652	5.79994							1.89768		3.23262	2.75625	0.618213		3.50649	3.66382					1.00847		0		6.3999	5.65038
Median			5.28104		0.365668					85.2069	7.397							1		5.13	5.13	1		1	0.870224					1		1		82.77	7.28
Min			0		0					61.5082	1.14245
Max			13.0013		26.7922					95.51	28.6162																												Fact	1.01774
	Table 1		Lab values																Table 2		Left-censored, raw
	Morpho Gr	Ns	Nv	Stat	Na	Mg	Al	Si	P	S	Cl	K	Ca	As	Sr	Ba			Morpho Gr	Ns	Nv	Stat	Na	Mg	Al	Si	P	S	Cl	K	Ca	As	Sr	Ba
	MC1	16	6	Mean		0.592806	0.858399						58.3155	1.47301	1.79871	36.9615			MC1	16	5	Mean			0.792331						57.4006	1.44875	1.89742	36.2938		1.02215
	Big Ba			SD		0.699078	1.18505						6.96341	0.443593	1.20777	6.58732			Big Ba			SD			1.17423						7.54372	0.443281	1.06312	6.39037
				Median		0.291752	0.584031						58.4687	1.33371	1.75716	37.4232						Median			0.300185						57.29	1.33	1.69	36.415
	MC2	50	6	Mean	0.694835	10.0541					3.02697		15.9549	5.38186	1.1247	63.7626			MC2	50	6	Mean		9.8684					4.08546		15.693	5.3028	1.3158	62.571		1.01177
	Small Ba			SD	1.02261	1.54839					3.64809		3.62081	3.93902	1.00456	4.88099			Small Ba			SD		1.50564					2.77891		3.71806	3.92427	0.78801	4.55088
				Median	0.055	9.885					0		15.9454	4.63454	1.18985	64.4837						Median		9.845					2.96		14.95	4.425	1.155	63.6
	MC3	70	5	Mean		0.48255						1.20161	90.279	2.6024	5.43445				MC3	70	4	Mean								1.3014	86.6713	2.51371	5.29934			1.044
	Sr-Tetraselmis			SD		0.598415						0.855735	3.47509	2.34569	3.32353				Sr-Tetraselmis			SD								0.556507	5.64323	2.32217	3.10293
				Median		0.271557						1.21479	90.7847	1.86138	5.06661							Median								1.185	88.29	1.78	4.86
	MC4	34	7	Mean	5.85945	1.31158					8.47242	1.34873	66.114	11.12	5.77381				MC4	34	7	Mean	5.87779	1.69956					8.50634	1.43441	65.7882	11.0676	5.71176			0.999143
	Sr-Titicaca			SD	6.777	1.86093					6.74557	1.30796	13.8158	3.85793	3.83527				Sr-Titicaca			SD	6.71707	1.56489					6.5922	1.14316	13.846	3.85378	3.59826
				Median	4.05	0.3502					6.35	1.1511	69.3	11.4	5.85591							Median	4.05	1.17334					6.35	1.15	69.3	11.4	5.85
	MC5	97	4	Mean		4.77162		2.1165					84.7297	8.38219					MC5	97	4	Mean		5.34959		2.26825					82.4578	8.18165				1.01774
	MgAs			SD		3.70753		3.88067					6.06652	5.79994					MgAs			SD		2.75625		3.66382					6.3999	5.65038
				Median		5.28104		0.365668					85.2069	7.397								Median		5.13		0.870224					82.77	7.28
	Table SI3																				Left-censored, closed 100%
	Morpho Gr	Ns	Nv	Stat	Na	Mg	Al	Si	Cl	K	Ca	As	Sr	Ba					Morpho Gr	Ns	Nv	Stat	Na	Mg	Al	Si	P	S	Cl	K	Ca	As	Sr	Ba
	MC1	16		Mean		0.592806	0.0660679				0.91491	0.0242561	-0.0987103	0.66779					MC1	16	5	Mean			0.809882						58.6721	1.48084	1.93945	37.0977
	Big Ba			SD															Big Ba			SD
				Median		0.291752	0.283845				1.17865	0.00371356	0.0671627	1.00821								Median
	MC2	50		Mean	0.694835	0.185739			-1.05849		0.261911	0.0790583	-0.191099	1.19159					MC2	50	6	Mean		9.98458					4.13355		15.8777	5.36523	1.33129	63.3076
	Small Ba			SD															Small Ba			SD
				Median	0.055	0.04			-2.96		0.995396	0.209544	0.0348467	0.883732								Median
	MC3	70		Mean		0.48255				-0.0997893	3.6077	0.0886871	0.135111						MC3	70	4	Mean								1.35865	90.4845	2.62431	5.5325
	Sr-Tetraselmis			SD															Sr-Tetraselmis			SD
				Median		0.271557				0.0297944	2.49474	0.0813767	0.20661									Median
	MC4	34		Mean	-0.0183424	-0.387985			-0.0339237	-0.0856868	0.325775	0.0523641	0.062044						MC4	34	7	Mean	5.87275	1.6981					8.49906	1.43318	65.7319	11.0582	5.70687
	Sr-Titicaca			SD															Sr-Titicaca			SD
				Median	0	-0.823135			0	0.0011022	0	0	0.00591182									Median
	MC5	97		Mean		-0.577967		-0.151751			2.27186	0.200542							MC5	97	4	Mean		5.44447							83.9203	8.32676
	MgAs			SD															MgAs			SD
				Median		0.151038		-0.504556			2.43692	0.117004										Median

## Sheet: 4) Tables 1, 3a, Fig SI5 
Table 1																		Table 3 A
Lab values																		Lab values
																									propDv			nD	nS
	Morpho Gr	Ns	Nv	Stat	Na	Mg	Al	Si	Cl	K	Ca	As	Sr	Ba				Na		MC1	MC2	MC3	MC4	MC5	1			1	0
																			MC1
	MC1	16	6	Mean		0.592806	0.858399				58.3155	1.47301	1.79871	36.9615					MC2				D
	Big Ba			SD		0.699078	1.18505				6.96341	0.443593	1.20777	6.58732					MC3
				Median		0.291752	0.584031				58.4687	1.33371	1.75716	37.4232					MC4		D
	MC2	50	6	Mean	0.694835	10.0541			3.02697		15.9549	5.38186	1.1247	63.7626					MC5
	Small Ba			SD	1.02261	1.54839			3.64809		3.62081	3.93902	1.00456	4.88099				Mg		MC1	MC2	MC3	MC4	MC5	0.7			0.7	0.3
				Median	0.055	9.885			0		15.9454	4.63454	1.18985	64.4837					MC1		D	S	S	D
	MC3	70	5	Mean		0.48255				1.20161	90.279	2.6024	5.43445						MC2	D		D	D	D
	Sr-Tetraselmis			SD		0.598415				0.855735	3.47509	2.34569	3.32353						MC3	S	D		S	D
				Median		0.271557				1.21479	90.7847	1.86138	5.06661						MC4	S	D	S		D
	MC4	34	7	Mean	5.85945	1.31158			8.47242	1.34873	66.114	11.12	5.77381						MC5	D	D	D	D
	Sr-Titicaca			SD	6.777	1.86093			6.74557	1.30796	13.8158	3.85793	3.83527					Al		MC1	MC2	MC3	MC4	MC5
				Median	4.05	0.3502			6.35	1.1511	69.3	11.4	5.85591						MC1	X
	MC5	97	4	Mean		4.77162		2.1165			84.7297	8.38219							MC2
	MgAs			SD		3.70753		3.88067			6.06652	5.79994							MC3
				Median		5.28104		0.365668			85.2069	7.397							MC4
																			MC5
																		Si		MC1	MC2	MC3	MC4	MC5
																			MC1
																			MC2
																			MC3
																			MC4
																			MC5					X
																		Cl		MC1	MC2	MC3	MC4	MC5	1			1	0
																			MC1
																			MC2				D
					Na	Mg	Cl	K	Ca	As	Sr								MC3
				MC3		0.48255		1.20161	90.279	2.6024	5.43445								MC4		D
				MC4	5.85945	1.31158	8.47242	1.34873	66.114	11.12	5.77381								MC5
																		K		MC1	MC2	MC3	MC4	MC5	0			0	1
																			MC1
																			MC2
																			MC3				S
																			MC4			S
																			MC5
																		Ca		MC1	MC2	MC3	MC4	MC5	1			1	0
																			MC1		D	D	D	D
																			MC2	D		D	D	D
																			MC3	D	D		D	D
																			MC4	D	D	D		D
																			MC5	D	D	D	D
																		As		MC1	MC2	MC3	MC4	MC5	1			1	0
																			MC1		D	D	D	D
																			MC2	D		D	D	D
																			MC3	D	D		D	D
																			MC4	D	D	D		D
																			MC5	D	D	D	D
																		Sr		MC1	MC2	MC3	MC4	MC5	0.8			0.833333	0.166667
																			MC1		D	D	D
																			MC2	D		D	D
																			MC3	D	D		S
																			MC4	D	D	S
																			MC5
																				MC1	MC2	MC3	MC4	MC5	1			1	0
																		Ba	MC1		D
																			MC2	D
																			MC3
																			MC4
																			MC5
																			PropDg	0.875	1	0.75	0.777778	1
																			nD	14	18	12	14	12
																			nS	2	0	4	4	0

## Sheet: 5)NaL
Gr	No	NaL
MC2	L019	0			From PAST
MC2	L034	2.02871
MC2	L093	2.82291				MC2	Lower conf.	Upper conf.	MC4	Lower conf.	Upper conf.		Kruskal-Wallis test for equal medians
MC2	L094	1.63934			N	50	50	50	34	34	34
MC2	L095	3.01715			Min	0			0				H (chi2):	35.25
MC2	L096	3.80633			Max	3.81			27				Hc (tie corrected):	36.61
MC2	L097	3.60636			Sum	34.73	19.8	48.35	199.22	114.85	270.23		p (same):	1.446e-09
MC2	L098	2.69282			Mean	0.6946	0.396	0.967	5.85941	3.37794	7.94794
MC2	L114	0			Std. error	0.146121	0.102344	0.180181	1.17978	0.572457	1.57814		There is a significant difference between sample medians
MC2	L115	0			Variance	1.06756	0.523713	1.62326	47.3242	11.142	84.6782
MC2	L117	0.63535			Stand. dev	1.03323	0.797045	1.35101	6.87926	4.62034	10.6009
MC2	L118	0			Median	0.055	-0.4	0.11	4.05	3.5	5.5
MC2	L121	0			25 prcntil	0	0	0	1.85	0.7	2.5			MC2	MC4
MC2	L122	0			75 prcntil	1.1325	0.5275	1.755	6.6	1.8875	9		MC2		1.488e-09
MC2	L124	0			Skewness	1.62263	0.812194	2.25972	2.20431	0.929844	3.32702		MC4	1.488e-09
MC2	L128	0.743264			Kurtosis	1.81177	-2.52822	3.99146	4.41047	-6.53771	8.82566
MC2	L129	1.3325			Geom. mean	0	0	0	0	-4.2026	0
MC2	L138	0.432718			Coeff. var	148.752	107.086	179.781	117.405	97.3303	155.698
MC2	L139	2.0913
MC2	L140	1.53196
MC2	L142	0
MC2	L143	0
MC2	L144	1.63457
MC2	L145	0.283673
MC2	L153	0
MC2	L168	1.2
MC2	L169	1.10989
MC2	L170	0.510051
MC2	L171	0.33
MC2	L172	0
MC2	L173	1.06
MC2	L174	0
MC2	L175	0.58
MC2	L176	0.11
MC2	L177	0
MC2	L186	0
MC2	L187	0
MC2	L188	0
MC2	L189	0
MC2	L190	0
MC2	L191	0
MC2	L192	0
MC2	L193	0
MC2	L194	0
MC2	L195	0
MC2	L196	0
MC2	L197	0
MC2	L200	0.48
MC2	L201	0.76221
MC2	L202	0.300661
MC4	T001	4.2
MC4	T002	4.1041
MC4	T003	7.2
MC4	T004	22.8
MC4	T005	26.5265
MC4	T006	27
MC4	T007	13
MC4	T008	3
MC4	T009	3.50701
MC4	T010	2.8
MC4	T011	2.6
MC4	T012	6.4
MC4	T013	7.9
MC4	T014	4.1
MC4	T015	2.4975
MC4	T016	4.6
MC4	T017	4
MC4	T018	6.10611
MC4	T019	9.10952
MC4	T020	4.3
MC4	T021	4.8
MC4	T022	4.1041
MC4	T023	1.2
MC4	T024	1.4
MC4	T025	1.9
MC4	T026	1.9
MC4	T027	1.2012
MC4	T028	10.7527
MC4	T029	0
MC4	T030	0
MC4	T031	1.21413
MC4	T032	1.6983
MC4	T033	0
MC4	T034	3.3

## Sheet: 6)MgL
Gr	No	MgL
MC1	L001	0
MC1	L002	0			MC1	Lower conf.	Upper conf.	MC2	Lower conf.	Upper conf.	MC3	Lower conf.	Upper conf.	MC4	Lower conf.	Upper conf.	MC5	Lower conf.	Upper conf.
MC1	L072	0		N	16	16	16	50	50	50	70	70	70	34	34	34	97	97	97
MC1	L073	1.15927		Min	0			7.13			0			0			0
MC1	L079	0.27226		Max	2.51			14.18			2.45			8.6			13
MC1	L105	2.51181		Sum	9.47	3.43	14.44	502.68	480.7	524.12	33.76	23.29	43.19	44.58	22	64.26	462.86	391.26	534.05
MC1	L141	0		Mean	0.591875	0.214375	0.9025	10.0536	9.614	10.4824	0.482286	0.332714	0.617	1.31118	0.647059	1.89	4.77175	4.03361	5.50567
MC1	L149	0.15		Std. error	0.18043	0.071003	0.244365	0.221162	0.174654	0.258647	0.0720519	0.0537299	0.0856416	0.323864	0.109255	0.41648	0.378398	0.33441	0.41753
MC1	L151	0.55		Variance	0.520883	0.0806629	0.95543	2.44564	1.5252	3.34491	0.363403	0.202083	0.513414	3.56619	0.405849	5.89749	13.8889	10.8475	16.9101
MC1	L152	1.87		Stand. dev	0.721722	0.463086	1.14961	1.56385	1.29302	1.88418	0.60283	0.481281	0.743714	1.88844	1.18332	2.66562	3.72679	3.33892	4.15695
MC1	L153	0.54		Median	0.29	-0.19	0.45	9.885	9.255	10.37	0.27	0.025	0.54	0.35	-1.2	0.6	5.28	4.46	6.25
MC1	L154	0.26		25 prcntil	0.0375	-0.1975	0.075	8.7575	8.045	9.015	0	0	0	0	-0.175	0	0	-3.645	0
MC1	L155	0.251915		75 prcntil	0.9	-0.07	1.49	11.0275	10.63	11.595	0.825	0.5675	1.0675	2.2	0.955	3.6	7.22	6.35	7.895
MC1	L156	0.311245		Skewness	1.69196	0.521832	2.95365	0.435384	-0.0424638	0.995706	1.3851	0.87154	1.97152	2.09098	1.2085	3.59361	0.146585	-0.136674	0.466514
MC1	L157	0.60429		Kurtosis	2.50052	-4.34566	6.34814	-0.0442462	-1.23477	0.837789	1.57082	-0.718681	3.56743	5.54011	0.281563	12.2622	-0.792918	-1.23923	-0.414652
MC1	L203	1.0041		Geom. mean	0	0	0	9.93656	9.50231	10.3531	0	0	0	0	0	0	0	0	0
MC2	L019	13.2892		Coeff. var	121.938	78.8985	165.337	15.5551	13.0094	18.6134	124.994	98.3246	148.335	144.026	97.1663	185.991	78.101	63.8035	91.3744
MC2	L034	10.4557
MC2	L093	8.69212
MC2	L094	8.54078									Kruskal-Wallis test for equal medians
MC2	L095	9.66109
MC2	L096	8.9728									H (chi2):	135.6
MC2	L097	9.47433									Hc (tie corrected):	138.5
MC2	L098	10.3038									p (same):	6.028e-29
MC2	L114	9.19875
MC2	L115	7.30091									There is a significant difference between sample medians
MC2	L117	11.1134
MC2	L118	7.89614
MC2	L121	8.78239										MC1	MC2	MC3	MC4	MC5
MC2	L122	7.13									MC1		2.255e-09	0.481	0.7043	0.00157
MC2	L124	9.33									MC2	2.255e-09		6.209e-21	1.623e-14	3.879e-16
MC2	L128	10.9838									MC3	0.481	6.209e-21		0.106	9.646e-10
MC2	L129	10.3893									MC4	0.7043	1.623e-14	0.106		6.089e-05
MC2	L138	14.1847									MC5	0.00157	3.879e-16	9.646e-10	6.089e-05
MC2	L139	10.5732
MC2	L140	11.3048
MC2	L142	12.23
MC2	L143	12.66
MC2	L144	9.73451
MC2	L145	10.3803
MC2	L153	12.5973
MC2	L168	9.06
MC2	L169	10.5789
MC2	L170	10.9711
MC2	L171	11.26
MC2	L172	8.62
MC2	L173	9.57
MC2	L174	11.2789
MC2	L175	10.93
MC2	L176	8.08
MC2	L177	8.63086
MC2	L186	9.64904
MC2	L187	9.81
MC2	L188	9.96
MC2	L189	10.109
MC2	L190	8.18
MC2	L191	9.26093
MC2	L192	8.38255
MC2	L193	11
MC2	L194	11.74
MC2	L195	8.64
MC2	L196	12.6913
MC2	L197	11.32
MC2	L200	10.39
MC2	L201	9.50757
MC2	L202	7.9074
MC3	L003	0
MC3	L004	0.223919
MC3	L005	0.325269
MC3	L006	0.420729
MC3	L007	0.942727
MC3	L008	0.635637
MC3	L009	0.78553
MC3	L010	0
MC3	L011	0.811606
MC3	L012	1.03824
MC3	L013	1.32006
MC3	L014	0.594998
MC3	L015	0.40201
MC3	L016	0
MC3	L017	0
MC3	L018	0
MC3	L042	0
MC3	L043	0
MC3	L044	0.11
MC3	L045	0
MC3	L046	0
MC3	L047	0
MC3	L048	0.874727
MC3	L049	0
MC3	L050	1.01341
MC3	L053	0
MC3	L054	1.13408
MC3	L055	0.592965
MC3	L056	0.602164
MC3	L057	0.141614
MC3	L058	1.08838
MC3	L059	0
MC3	L060	0.273141
MC3	L061	0.33
MC3	L062	0
MC3	L063	0.22496
MC3	L064	0.515308
MC3	L066	0.66
MC3	L067	0
MC3	L068	0
MC3	L069	1.45734
MC3	L070	2.00514
MC3	L071	1.57196
MC3	L074	0
MC3	L075	0
MC3	L076	0
MC3	L077	1.08011
MC3	L078	0
MC3	L081	0
MC3	L082	0
MC3	L083	0.791526
MC3	L084	0.991718
MC3	L085	1.14723
MC3	L086	0
MC3	L087	0
MC3	L088	0
MC3	L089	0.370999
MC3	L090	0
MC3	L091	0
MC3	L092	0
MC3	L149	1.66983
MC3	L150	1.19988
MC3	L152	2.30912
MC3	L154	0.31
MC3	L204	0
MC3	L205	0
MC3	L206	0.269973
MC3	L207	0.58
MC3	L150	2.4522
MC3	L151	0.51
MC4	T001	0
MC4	T002	3.3033
MC4	T003	4.3
MC4	T004	2.2
MC4	T005	2.1021
MC4	T006	3.4
MC4	T007	4.3
MC4	T008	0.2
MC4	T009	0.501002
MC4	T010	0.2
MC4	T011	0.1
MC4	T012	2.2
MC4	T013	2.3
MC4	T014	0.3
MC4	T015	0.0999001
MC4	T016	0.8
MC4	T017	1.9
MC4	T018	2.1021
MC4	T019	3.5824
MC4	T020	0
MC4	T021	0
MC4	T022	0.4004
MC4	T023	0
MC4	T024	0
MC4	T025	0.5
MC4	T026	1
MC4	T027	0.2002
MC4	T028	8.60215
MC4	T029	0
MC4	T030	0
MC4	T031	0
MC4	T032	0
MC4	T033	0
MC4	T034	0
MC5	L024	4.36
MC5	L025	4.26309
MC5	L026	5.2343
MC5	L027	5.094
MC5	L028	0
MC5	L029	0
MC5	L030	3.7464
MC5	L031	3.53744
MC5	L032	8.85021
MC5	L033	6.67626
MC5	L035	5.2654
MC5	L036	4.84742
MC5	L037	6.27414
MC5	L038	5.28104
MC5	L039	5.71066
MC5	L040	4.42166
MC5	L041	3.53588
MC5	L099	6.60951
MC5	L100	6.98161
MC5	L101	6.7539
MC5	L102	12.9015
MC5	L103	9.56781
MC5	L106	6.25202
MC5	L107	8.97899
MC5	L108	4.19821
MC5	L109	8.65556
MC5	L110	6.17881
MC5	L111	6.77011
MC5	L112	5.59149
MC5	L113	7.12809
MC5	L116	5.74
MC5	L119	7.04153
MC5	L120	4.44695
MC5	L123	5.43703
MC5	L125	5.75139
MC5	L125	0
MC5	L126	8.41
MC5	L126	6.34282
MC5	L127	3.44508
MC5	L127	7.8
MC5	L128	3.82
MC5	L129	0
MC5	L130	0
MC5	L130	1.62984
MC5	L131	10.08
MC5	L131	1.52
MC5	L132	0
MC5	L132	0
MC5	L133	0
MC5	L133	0
MC5	L134	0
MC5	L134	0
MC5	L135	0
MC5	L135	0
MC5	L136	0
MC5	L136	0
MC5	L137	0
MC5	L137	0
MC5	L138	6.9707
MC5	L139	0
MC5	L140	5.57
MC5	L141	8.09
MC5	L143	6.13
MC5	L144	0
MC5	L145	7.72
MC5	L146	0
MC5	L146	5.98815
MC5	L147	4.32957
MC5	L147	3.91061
MC5	L148	12.1863
MC5	L148	8.5
MC5	L158	7.31
MC5	L159	5.7
MC5	L160	6.1
MC5	L161	0
MC5	L162	0
MC5	L163	0
MC5	L164	0
MC5	L165	0
MC5	L166	0
MC5	L167	0
MC5	L179	8.93578
MC5	L180	10.6833
MC5	L181	7.8413
MC5	L182	7.77612
MC5	L183	12.9163
MC5	L184	11.7015
MC5	L185	11.154
MC5	L198	7.65
MC5	L199	13.0013
MC5	L208	7.49925
MC5	L209	8.11
MC5	L210	6.58
MC5	L211	4.30957
MC5	L212	4.54
MC5	L213	6.51317
MC5	L214	0

## Sheet: 7)AlL
No	mc	AlL
L001	MC1	1.00579
L002	MC1	0.463056				All	Lower conf.	Upper conf.
L072	MC1	1.09449			N	16	16	16
L073	MC1	2.35887			Min	0
L079	MC1	0			Max	4.71
L105	MC1	1.29047			Sum	13.74	3.73	21.64
L141	MC1	1.11989			Mean	0.85875	0.233125	1.3525
L149	MC1	0			Std. error	0.306002	0	0.417601
L151	MC1	4.71			Variance	1.4982	-0.278603	2.79025
L152	MC1	0			Stand. dev	1.22401	0.638322	1.99398
L153	MC1	0			Median	0.585	0.08	1.17
L154	MC1	0			25 prcntil	0	-0.46	0
L155	MC1	0.79605			75 prcntil	1.1125	-0.135	1.515
L156	MC1	0.190763			Skewness	2.34553	1.57465	4.67112
L157	MC1	0.705006			Kurtosis	6.43848	1.90693	14.702
L203	MC1	0			Geom. mean	0	0	0
					Coeff. var	142.534	88.8938	205.658

## Sheet: 8)SiL
Gr	No	SiL
MC5	L024	10.3
MC5	L025	4.51685
MC5	L026	26.7922
MC5	L027	3.98067
MC5	L028	6.53
MC5	L029	9.7329
MC5	L030	13.6373
MC5	L031	12.4121
MC5	L032	0
MC5	L033	0
MC5	L035	0.946708
MC5	L036	1.9099
MC5	L037	1.12747
MC5	L038	4.00453
MC5	L039	2.5698
MC5	L040	3.38614
MC5	L041	6.94732
MC5	L099	0
MC5	L100	0
MC5	L101	0
MC5	L102	6.95103
MC5	L103	6.01581
MC5	L106	1.59534
MC5	L107	0.451773
MC5	L108	0.630879
MC5	L109	0.722222
MC5	L110	1.34322
MC5	L111	0.371984
MC5	L112	1.38744
MC5	L113	2.01328
MC5	L116	1.2
MC5	L119	3.6287
MC5	L120	3.79994
MC5	L123	5.44739
MC5	L125	1.46362
MC5	L125	0
MC5	L126	4.58
MC5	L126	0.381601
MC5	L127	0
MC5	L127	0
MC5	L128	0
MC5	L129	0
MC5	L130	0
MC5	L130	1.51985
MC5	L131	0
MC5	L131	3.71
MC5	L132	0
MC5	L132	1.30163
MC5	L133	0
MC5	L133	2.41
MC5	L134	0
MC5	L134	1.39216
MC5	L135	0
MC5	L135	10.2684
MC5	L136	0
MC5	L136	8.7146				All	Lower conf.	Upper conf.
MC5	L137	0			N	97	97	97
MC5	L137	2.23			Min	0
MC5	L138	0			Max	26.79
MC5	L139	0			Sum	205.29	124.64	274.35
MC5	L140	0			Mean	2.11639	1.28495	2.82835
MC5	L141	0			Std. error	0.396054	0.0701136	0.505101
MC5	L143	0			Variance	15.2153	0.476844	24.7473
MC5	L144	0			Stand. dev	3.90068	2.32836	5.41738
MC5	L145	0			Median	0.37	-0.39	0.74
MC5	L146	0			25 prcntil	0	0	0
MC5	L146	0.950337			75 prcntil	3.095	2.19	4.765
MC5	L147	0			Skewness	3.49058	2.40706	5.39264
MC5	L147	0.365668			Kurtosis	16.862	6.00193	31.9472
MC5	L148	0			Geom. mean	0	0	0
MC5	L148	0			Coeff. var	184.308	141.002	228.748
MC5	L158	0
MC5	L159	0
MC5	L160	0.15
MC5	L161	4.48182
MC5	L162	0
MC5	L163	0
MC5	L164	0
MC5	L165	0
MC5	L166	0
MC5	L167	0
MC5	L179	3.51373
MC5	L180	4.88233
MC5	L181	3.46767
MC5	L182	0.224311
MC5	L183	0.915903
MC5	L184	1.21976
MC5	L185	2.80413
MC5	L198	0
MC5	L199	0
MC5	L208	0
MC5	L209	0
MC5	L210	0
MC5	L211	0
MC5	L212	0
MC5	L213	0
MC5	L214	0

## Sheet: 9)ClL
Gr	No	ClL
MC2	L019	0
MC2	L034	0
MC2	L093	0				MC2	Lower conf.	Upper conf.	MC4	Lower conf.	Upper conf.		Kruskal-Wallis test for equal medians
MC2	L094	0			N	50	50	50	34	34	34
MC2	L095	0			Min	0			0				H (chi2):	16.67
MC2	L096	0			Max	11.43			29.13				Hc (tie corrected):	17.38
MC2	L097	0			Sum	151.35	100.94	201	288.07	205.36	361.22		p (same):	3.056e-05
MC2	L098	0			Mean	3.027	2.0188	4.02	8.47265	6.04	10.6241
MC2	L114	6.45161			Std. error	0.521175	0.455193	0.592156	1.17427	0.636631	1.51301		There is a significant difference between sample medians
MC2	L115	7.6578			Variance	13.5812	10.36	17.5324	46.8833	13.7802	77.8332
MC2	L117	6.60348			Stand. dev	3.68526	3.27147	4.26732	6.84714	4.75076	9.70261
MC2	L118	6.61913			Median	0	-4.12	0	6.35	4.1	7.7			MC2	MC4
MC2	L121	7.49828			25 prcntil	0	0	0	4.45	3.31	6.445		MC2		3.119e-05
MC2	L122	11.43			75 prcntil	6.605	5.5175	9.09	10.125	4.3275	12.44		MC4	3.119e-05
MC2	L124	6.28			Skewness	0.672241	0.0583755	1.19255	1.69077	0.885791	2.75479
MC2	L128	0			Kurtosis	-1.12246	-2.51343	-0.541161	2.99336	-2.49813	6.27396
MC2	L129	0			Geom. mean	0	0	0	0	-7.91319	0
MC2	L138	0			Coeff. var	121.746	82.8141	149.029	80.8146	64.8674	104.693
MC2	L139	0
MC2	L140	0
MC2	L142	0
MC2	L143	0
MC2	L144	0
MC2	L145	0
MC2	L153	0
MC2	L168	0
MC2	L169	0
MC2	L170	0
MC2	L171	0
MC2	L172	0
MC2	L173	0
MC2	L174	0
MC2	L175	0
MC2	L176	0
MC2	L177	9.43094
MC2	L186	8.56914
MC2	L187	8.36
MC2	L188	7.49
MC2	L189	9.73903
MC2	L190	8.8
MC2	L191	7.79078
MC2	L192	6.75578
MC2	L193	2.99
MC2	L194	4.76
MC2	L195	4.12
MC2	L196	4.12041
MC2	L197	4.77
MC2	L200	6.56
MC2	L201	2.93852
MC2	L202	1.61355
MC4	T001	6.3
MC4	T002	6.80681
MC4	T003	12
MC4	T004	19.9
MC4	T005	29.1291
MC4	T006	28.3
MC4	T007	13.9
MC4	T008	5
MC4	T009	4.20842
MC4	T010	6
MC4	T011	4.5
MC4	T012	9.8
MC4	T013	11.1
MC4	T014	7.2
MC4	T015	5.59441
MC4	T016	6.4
MC4	T017	9.7
MC4	T018	8.20821
MC4	T019	15.4555
MC4	T020	8.6
MC4	T021	9.3
MC4	T022	7.80781
MC4	T023	4.3
MC4	T024	5.5
MC4	T025	4.6
MC4	T026	4.6
MC4	T027	3.8038
MC4	T028	17.3118
MC4	T029	0
MC4	T030	2.2
MC4	T031	2.53863
MC4	T032	2.1978
MC4	T033	0
MC4	T034	5.8

## Sheet: 10)KL
Gr	No	KL
MC3	L003	0
MC3	L004	1.50636
MC3	L005	1.38239
MC3	L006	1.95998
MC3	L007	0.93259
MC3	L008	1.3943
MC3	L009	1.39535
MC3	L010	1.11145
MC3	L011	1.1261
MC3	L012	2.33347
MC3	L013	1.71608
MC3	L014	1.43203
MC3	L015	1.19598
MC3	L016	1.13756
MC3	L017	0.878845
MC3	L018	2.08658
MC3	L042	1.07516
MC3	L043	1.18379
MC3	L044	0.51
MC3	L045	0.922861
MC3	L046	0
MC3	L047	1.03
MC3	L048	0
MC3	L049	0
MC3	L050	0
MC3	L053	0
MC3	L054	1.32477
MC3	L055	1.20603
MC3	L056	1.06144
MC3	L057	1.42626
MC3	L058	1.76317
MC3	L059	1.05549
MC3	L060	1.50733
MC3	L061	1.52
MC3	L062	1.15726
MC3	L063	1.26406
MC3	L064	1.32363
MC3	L066	0
MC3	L067	2.19318
MC3	L068	0
MC3	L069	1.53521
MC3	L070	2.48197
MC3	L071	2.59665
MC3	L074	0
MC3	L075	0
MC3	L076	0
MC3	L077	1.05011
MC3	L078	0.669933
MC3	L081	1.7831
MC3	L082	2.17226
MC3	L083	2.3513
MC3	L084	1.97254
MC3	L085	3.97945
MC3	L086	2.20776
MC3	L087	1.43961
MC3	L088	1.10797
MC3	L089	1.88679
MC3	L090	1.15762
MC3	L091	1.3559
MC3	L092	1.22356
MC3	L149	1.77982
MC3	L150	0
MC3	L152	0
MC3	L154	0
MC3	L204	0
MC3	L205	0
MC3	L206	1.32987				MC3	Lower conf.	Upper conf.	MC4	Lower conf.	Upper conf.		Kruskal-Wallis test for equal medians
MC3	L207	1.55			N	70	70	70	34	34	34
MC3	L150	3.46765			Min	0			0				H (chi2):	0
MC3	L151	1.9			Max	3.98			6.99				Hc (tie corrected):	0
MC4	T001	1.6			Sum	84.13	69.64	97.89	45.85	29.73	59.04		p (same):	1
MC4	T002	1.3013			Mean	1.20186	0.994857	1.39843	1.34853	0.874412	1.73647
MC4	T003	0			Std. error	0.103028	0.0808935	0.119373	0.227702	0	0.296219		There is no significant difference between sample medians
MC4	T004	1.2			Variance	0.743036	0.458064	0.997497	1.76284	-0.201362	2.98336
MC4	T005	0.800801			Stand. dev	0.861995	0.710083	1.02501	1.32772	0.724884	1.91902
MC4	T006	1.4			Median	1.215	1.03	1.32	1.15	0.7	1.4			MC3	MC4
MC4	T007	2.1			25 prcntil	0.63	0.185	1.26	0.45	-0.1	0.9		MC3		0.9972
MC4	T008	0			75 prcntil	1.73	1.4975	2.03	1.85	1.26	2.3		MC4	0.9972
MC4	T009	1.1022			Skewness	0.433691	-0.0432472	1.23252	2.36837	1.71713	4.86715
MC4	T010	1.6			Kurtosis	0.721908	-0.692221	2.49831	9.09517	4.83936	19.3076
MC4	T011	1			Geom. mean	0	0	0	0	0	0
MC4	T012	3			Coeff. var	71.7219	55.9785	86.7338	98.4568	68.4994	137.379
MC4	T013	3
MC4	T014	1.4
MC4	T015	0.599401
MC4	T016	0.8
MC4	T017	1
MC4	T018	1.6016
MC4	T019	2.55885
MC4	T020	2.1
MC4	T021	2
MC4	T022	2.4024
MC4	T023	1.1
MC4	T024	1.4
MC4	T025	1.1
MC4	T026	1.8
MC4	T027	0.900901
MC4	T028	6.98925
MC4	T029	0
MC4	T030	0
MC4	T031	0
MC4	T032	0
MC4	T033	0
MC4	T034	0

[truncated: 16 more sheets: 11)CaL, 12)AsL, 13)SrL, 14)BaL, 15)HISTO Lab, 16)Table SI5, 17)NaC, 18)MgC, 19)AlC, 20)SiC, 21)ClC, 22)KC, 23)SrC, 24)Tables 2,3b,SI3, 25)SI4, 26) Ternary]
