# Supplementary material for: First Observation of Unicellular Organisms Concentrating Arsenic in ACC Intracellular Inclusions
Source: Preprints.org preprint supplement (doi:10.20944/preprints202111.0267.v1), 2021-11-16
Supplement: Supplementary file 2 [file SI_excel_2.xlsx]

## Sheet: 1. MC2
No	OldNo	Class	Morph	Id	Na	Mg	Al	Si	P	S	Cl	K	Ca	As	Sr	Ba		NaC	MgC	AlC	SiC	PC	SC	ClC	KC	CaC	AsC	SrC	BaC
L019	413	Petit Ba	2	sp_ge_130611_08a_018.5_413.1a_04_an05a-01-b	0	12.04	2.64	6.76	0	0	0	0	14.57	9.98	0	54.01		1	12.04	2.64	6.76	1	1	1	1	14.57	9.98	1	54.01
L034	420	Petit Ba	2	sp_ge_130621_09a_015.0_420.2a_04_an04a-01-b	1.95	10.05	3.89	0	0	0	0	0	16.13	1.17	2.5	64.32		1.95	10.05	3.89	1	1	1	1	1	16.13	1.17	2.5	64.32
L093	619	Petit Ba	2	sp_ge_141104_24b_020.0_619.4b_01_an01a-01-b	2.78	8.56	1.53	0	0	0	0	0	16.47	4.91	1.45	64.31		2.78	8.56	1.53	1	1	1	1	1	16.47	4.91	1.45	64.31
L094	619	Petit Ba	2	sp_ge_141104_24b_020.0_619.4b_01_an01a-02-b	1.62	8.44	0.93	0	0	0	0	0.25	13.27	2.3	1.39	71.8		1.62	8.44	1	1	1	1	1	1	13.27	2.3	1.39	71.8
L095	619	Petit Ba	2	sp_ge_141104_24b_020.0_619.4b_01_an01a-03-b	2.92	9.35	3.22	0	0	0	0	0	12.91	2.42	2.14	67.04		2.92	9.35	3.22	1	1	1	1	1	12.91	2.42	2.14	67.04
L096	619	Petit Ba	2	sp_ge_141104_24b_020.0_619.4b_02_an02a-01-b	3.75	8.84	1.27	0	0	0	0	0.21	15.59	2.36	2.07	65.91		3.75	8.84	1.27	1	1	1	1	1	15.59	2.36	2.07	65.91
L097	619	Petit Ba	2	sp_ge_141104_24b_020.0_619.4b_02_an02a-02-b	3.54	9.3	1.84	0	0	0	0	0	12.7	2.41	2.57	67.64		3.54	9.3	1.84	1	1	1	1	1	12.7	2.41	2.57	67.64
L098	619	Petit Ba	2	sp_ge_141104_24b_020.0_619.4b_02_an02a-03-b	2.65	10.14	1.52	0	0	0	0	0.08	14.68	1.67	1.84	67.43		2.65	10.14	1.52	1	1	1	1	1	14.68	1.67	1.84	67.43
L114	198	Petit Ba	2	sp_ge_150511_33a_010.0_697.1a_01_an01a-01-b	0	8.84	0	3.9	0	0	6.2	0	14.1	2.96	1.66	62.34		1	8.84	1	3.9	1	1	6.2	1	14.1	2.96	1.66	62.34
L115	198	Petit Ba	2	sp_ge_150511_33a_010.0_697.1a_01_an01a-02-b	0	7.16	0	1.92	0	0	7.51	0	19.14	3.09	1.42	59.75		1	7.16	1	1.92	1	1	7.51	1	19.14	3.09	1.42	59.75
L117	198	Petit Ba	2	sp_ge_150511_33a_010.0_697.1a_04_an03a-01-b	0.61	10.67	0	4	0	0	6.34	0	12.03	3.21	1.37	61.78		1	10.67	1	4	1	1	6.34	1	12.03	3.21	1.37	61.78
L118	198	Petit Ba	2	sp_ge_150511_33a_010.0_697.1a_04_an03a-02-b	0	7.42	0	6.03	0	0	6.22	0	13.48	3.3	1.34	62.21		1	7.42	1	6.03	1	1	6.22	1	13.48	3.3	1.34	62.21
L121	198	Petit Ba	2	sp_ge_150511_33a_010.0_697.1a_08_an07a-01-b	0	7.66	2.48	10.3	0	0	6.54	0	14.18	1.91	0	56.93		1	7.66	2.48	10.3	1	1	6.54	1	14.18	1.91	1	56.93
L122	198	Petit Ba	2	sp_ge_150511_33a_010.0_697.1a_08_an07a-02-b	0	7.13	0	0	0	0	11.43	0	16.35	2.74	0.93	61.42		1	7.13	1	1	1	1	11.43	1	16.35	2.74	1	61.42
L124	198	Petit Ba	2	sp_ge_150511_33a_010.0_697.1a_12_an10a-01-b	0	9.33	0	0	0	0	6.28	0	16.97	1.42	1.75	64.25		1	9.33	1	1	1	1	6.28	1	16.97	1.42	1.75	64.25
L128	201	Petit Ba	2	sp_ge_150519_34a_018.0_703.1a_02_an02b-01-b	0.72	10.64	0.99	1.76	0	0	0	0.37	15.14	4.3	1.36	64.71		1	10.64	1	1.76	1	1	1	1	15.14	4.3	1.36	64.71
L129	201	Petit Ba	2	sp_ge_150519_34a_018.0_703.1a_02_an02b-02-b	1.28	9.98	1.4	2.54	0	0	0	0	11.37	6.03	0.92	66.48		1.28	9.98	1.4	2.54	1	1	1	1	11.37	6.03	1	66.48
L138	201	Petit Ba	2	sp_ge_150519_34a_018.0_703.1a_04_an03b-01-b	0.41	13.44	1.31	3.36	0	0	0	0.58	10.48	2.2	1.4	66.82		1	13.44	1.31	3.36	1	1	1	1	10.48	2.2	1.4	66.82
L139	201	Petit Ba	2	sp_ge_150519_34a_018.0_703.1a_05_an04b-01-b	1.97	9.96	2.8	2.62	0	0	0	0.36	13.59	4.55	1.13	63		1.97	9.96	2.8	2.62	1	1	1	1	13.59	4.55	1.13	63
L140	201	Small Ba	2	sp_ge_150519_34a_018.0_703.1a_05_an04b-02-b	1.45	10.7	1.75	2.53	0	0	0	1.07	8.29	2.37	1.64	70.2		1.45	10.7	1.75	2.53	1	1	1	1.07	8.29	2.37	1.64	70.2
L142	853	Small Ba	2	sp_ge_170424_49a_010.0_853.1a_06_an04a-01-b	0	12.23	0	0	0	0	0	0	20.01	8.06	0	59.7		1	12.23	1	1	1	1	1	1	20.01	8.06	1	59.7
L143	853	Small Ba	2	sp_ge_170424_49a_010.0_853.1a_06_an04a-02-b	0	12.66	0	0	0	0	0	0	21.69	1.72	0	63.93		1	12.66	1	1	1	1	1	1	21.69	1.72	1	63.93
L144	201	Small Ba	2	sp_ge_150519_34a_018.0_703.1a_09_an06b-01-b	1.57	9.35	1.91	2.02	0	0	0	0	14.02	4.81	1.38	64.92		1.57	9.35	1.91	2.02	1	1	1	1	14.02	4.81	1.38	64.92
L145	201	Small Ba	2	sp_ge_150519_34a_018.0_703.1a_09_an06b-02-b	0.27	9.88	2.38	2.43	0	0	0	0	13.69	5.32	0.84	65.18		1	9.88	2.38	2.43	1	1	1	1	13.69	5.32	1	65.18
L153		Small Ba	2	sp_ge_151103_39a_010.0_781.1a_33_an18a-01-l	0	12.46	1.09	0	0	0	0	0	18.05	1.27	5.38	61.75		1	12.46	1.09	1	1	1	1	1	18.05	1.27	5.38	61.75
L168		Small Ba	2	sp_ge_160517_43a_010.0_823.1a_01_an01a-01-l	1.2	9.06	0	0	0	0	0	0	20.75	2.5	1.87	64.62		1.2	9.06	1	1	1	1	1	1	20.75	2.5	1.87	64.62
L169		Small Ba	2	sp_ge_160517_43a_010.0_823.1a_02_an02a-01-l	1.11	10.58	0	0	0	0	0	0	19.17	2.33	2.13	64.69		1.11	10.58	1	1	1	1	1	1	19.17	2.33	2.13	64.69
L170		Small Ba	2	sp_ge_160517_43a_010.0_823.1a_13_an08a-01-l	0.51	10.97	0	0	0	0	0	0	18.48	1.81	1.18	67.04		1	10.97	1	1	1	1	1	1	18.48	1.81	1.18	67.04
L171		Small Ba	2	sp_ge_160517_43a_010.0_823.1a_13_an08a-02-l	0.33	11.26	0	0	0	0	0	0	16.77	1.78	0.94	68.92		1	11.26	1	1	1	1	1	1	16.77	1.78	1	68.92
L172		Small Ba	2	sp_ge_160517_43a_010.0_823.1a_15_an09a-01-l	0	8.62	0	0	0	0	0	0	25.72	1.19	1.12	63.35		1	8.62	1	1	1	1	1	1	25.72	1.19	1.12	63.35
L173		Small Ba	2	sp_ge_160517_43a_010.0_823.1a_15_an09a-02-l	1.06	9.57	0	0	0	0	0	0	24.92	1.64	1.64	61.17		1.06	9.57	1	1	1	1	1	1	24.92	1.64	1.64	61.17
L174		Small Ba	2	sp_ge_160517_43a_010.0_823.1a_18_an11a-01-l	0	11.28	0	0	0	0	0	0	17.91	3.22	1.76	65.84		1	11.28	1	1	1	1	1	1	17.91	3.22	1.76	65.84
L175		Small Ba	2	sp_ge_160517_43a_010.0_823.1a_19_an12a-01-l	0.58	10.93	0	0	0	0	0	0	16.93	5.07	1.05	65.44		1	10.93	1	1	1	1	1	1	16.93	5.07	1.05	65.44
L176		Small Ba	2	sp_ge_160517_43a_010.0_823.1a_21_an13a-01-l	0.11	8.08	0	0	0	0	0	0	17.2	5.06	0	69.55		1	8.08	1	1	1	1	1	1	17.2	5.06	1	69.55
L177		Small Ba	2	sp_ge_160614_44a_010.0_827.1a_02_an02a-01-b	0	8.63	0	0	0	0	9.43	0	14.76	12.13	1.53	53.51		1	8.63	1	1	1	1	9.43	1	14.76	12.13	1.53	53.51
L186		Small Ba	2	sp_ge_160614_44a_010.0_827.1a_16_an07a-01-b	0	9.65	0	0	0	0	8.57	0	16.5	10.83	0	54.46		1	9.65	1	1	1	1	8.57	1	16.5	10.83	1	54.46
L187		Small Ba	2	sp_ge_160614_44a_010.0_827.1a_16_an07a-02-b	0	9.81	0	0	0	0	8.36	0	17.01	9.4	0	55.42		1	9.81	1	1	1	1	8.36	1	17.01	9.4	1	55.42
L188		Small Ba	2	sp_ge_160614_44a_010.0_827.1a_17_an08a-01-b	0	9.96	0	0	0	0	7.49	0	12.9	6	0	63.65		1	9.96	1	1	1	1	7.49	1	12.9	6	1	63.65
L189		Small Ba	2	sp_ge_160614_44a_010.0_827.1a_17_an08a-02-b	0	10.11	0	0	0	0	9.74	0	12.58	6.28	0	61.3		1	10.11	1	1	1	1	9.74	1	12.58	6.28	1	61.3
L190		Small Ba	2	sp_ge_160614_44a_010.0_827.1a_17_an08a-03-b	0	8.18	0	0	0	0	8.8	0	21.7	6.11	0	55.21		1	8.18	1	1	1	1	8.8	1	21.7	6.11	1	55.21
L191		Small Ba	2	sp_ge_160614_44a_010.0_827.1a_18_an01a-01-b	0	9.26	0	0	0	0	7.79	0	14.1	12.98	0.32	55.54		1	9.26	1	1	1	1	7.79	1	14.1	12.98	1	55.54
L192		Small Ba	2	sp_ge_160614_44a_010.0_827.1a_18_an01a-02-b	0	8.09	0	3.48	0	0	6.52	0	16.05	9.33	0.83	55.69		1	8.09	1	3.48	1	1	6.52	1	16.05	9.33	1	55.69
L193		Small Ba	2	sp_ge_160712_45a_018.0_832.2a_01_an02a-01-b	0	11	0	0	0	0	2.99	0	10.98	11.48	0	63.55		1	11	1	1	1	1	2.99	1	10.98	11.48	1	63.55
L194		Small Ba	2	sp_ge_160712_45a_018.0_832.2a_01_an02a-02-b	0	11.74	0	0	0	0	4.76	0	10.9	14.16	0	58.44		1	11.74	1	1	1	1	4.76	1	10.9	14.16	1	58.44
L195		Small Ba	2	sp_ge_160712_45a_018.0_832.2a_01_an02a-03-b	0	8.64	0	0	0	0	4.12	0	12.57	9.9	0	64.77		1	8.64	1	1	1	1	4.12	1	12.57	9.9	1	64.77
L196		Small Ba	2	sp_ge_160712_45a_018.0_832.2a_02_an01a-01-b	0	12.69	0	0	0	0	4.12	0	11.41	18.58	0	53.19		1	12.69	1	1	1	1	4.12	1	11.41	18.58	1	53.19
L197		Small Ba	2	sp_ge_160712_45a_018.0_832.2a_02_an01a-02-b	0	11.32	0	0	0	0	4.77	0	12.86	8.5	0	62.55		1	11.32	1	1	1	1	4.77	1	12.86	8.5	1	62.55
L200		Small Ba	2	sp_ge_160712_45a_018.0_834.1a_35_an02a-01-g	0.48	10.39	0	0	0	0	6.56	0	13.53	6.7	1.64	60.7		1	10.39	1	1	1	1	6.56	1	13.53	6.7	1.64	60.7
L201		Small Ba	2	sp_ge_160712_45a_018.0_834.1a_39_an04a-01-g	0.76	9.48	0	0	0	0	2.93	0.29	16.02	5.66	1.01	63.85		1	9.48	1	1	1	1	2.93	1	16.02	5.66	1.01	63.85
L202		Small Ba	2	sp_ge_160712_45a_018.0_834.1a_39_an04a-02-g	0.3	7.89	0	0	0	0	1.61	0.23	24.03	6.02	1.66	58.27		1	7.89	1	1	1	1	1.61	1	24.03	6.02	1.66	58.27
					25	0	33	36	50	50	27	41	0	0	15	0		36	0	35	36	50	50	27	49	0	0	21	0
					0.5	0	0.66	0.72	1	1	0.54	0.82	0	0	0.3	0		0.72	0	0.7	0.72	1	1	0.54	0.98	0	0	0.42	0

## Sheet: 2. MC2 Lab
No	Na	Mg	Cl	Ca	As	Sr	Ba		No	Na	Mg	Cl	Ca	As	Sr	Ba	Fact		No	NaL	MgL	ClL	CaL	AsL	SrL	Ba
L019	0	12.04	0	14.57	9.98	0	54.01		L019	0	12.04	0	14.57	9.98	0	54.01	1.10375		L019	0	13.2892	0	16.0817	11.0155	0	59.6137
L034	1.95	10.05	0	16.13	1.17	2.5	64.32		L034	1.95	10.05	0	16.13	1.17	2.5	64.32	1.04037		L034	2.02871	10.4557	0	16.7811	1.21723	2.60092	66.9164
L093	2.78	8.56	0	16.47	4.91	1.45	64.31		L093	2.78	8.56	0	16.47	4.91	1.45	64.31	1.01543		L093	2.82291	8.69212	0	16.7242	4.98578	1.47238	65.3026
L094	1.62	8.44	0	13.27	2.3	1.39	71.8		L094	1.62	8.44	0	13.27	2.3	1.39	71.8	1.01194		L094	1.63934	8.54078	0	13.4285	2.32746	1.4066	72.6574
L095	2.92	9.35	0	12.91	2.42	2.14	67.04		L095	2.92	9.35	0	12.91	2.42	2.14	67.04	1.03327		L095	3.01715	9.66109	0	13.3395	2.50052	2.2112	69.2705
L096	3.75	8.84	0	15.59	2.36	2.07	65.91		L096	3.75	8.84	0	15.59	2.36	2.07	65.91	1.01502		L096	3.80633	8.9728	0	15.8242	2.39545	2.1011	66.9001
L097	3.54	9.3	0	12.7	2.41	2.57	67.64		L097	3.54	9.3	0	12.7	2.41	2.57	67.64	1.01874		L097	3.60636	9.47433	0	12.9381	2.45518	2.61817	68.9079
L098	2.65	10.14	0	14.68	1.67	1.84	67.43		L098	2.65	10.14	0	14.68	1.67	1.84	67.43	1.01616		L098	2.69282	10.3038	0	14.9172	1.69698	1.86973	68.5195
L114	0	8.84	6.2	14.1	2.96	1.66	62.34		L114	0	8.84	6.2	14.1	2.96	1.66	62.34	1.04058		L114	0	9.19875	6.45161	14.6722	3.08012	1.72737	64.8699
L115	0	7.16	7.51	19.14	3.09	1.42	59.75		L115	0	7.16	7.51	19.14	3.09	1.42	59.75	1.01968		L115	0	7.30091	7.6578	19.5167	3.15081	1.44795	60.9259
L117	0.61	10.67	6.34	12.03	3.21	1.37	61.78		L117	0.61	10.67	6.34	12.03	3.21	1.37	61.78	1.04156		L117	0.63535	11.1134	6.60348	12.5299	3.3434	1.42693	64.3475
L118	0	7.42	6.22	13.48	3.3	1.34	62.21		L118	0	7.42	6.22	13.48	3.3	1.34	62.21	1.06417		L118	0	7.89614	6.61913	14.345	3.51176	1.42599	66.202
L121	0	7.66	6.54	14.18	1.91	0	56.93		L121	0	7.66	6.54	14.18	1.91	0	56.93	1.14653		L121	0	8.78239	7.49828	16.2577	2.18986	0	65.2717
L122	0	7.13	11.43	16.35	2.74	0.93	61.42		L122	0	7.13	11.43	16.35	2.74	0.93	61.42	1		L122	0	7.13	11.43	16.35	2.74	0.93	61.42
L124	0	9.33	6.28	16.97	1.42	1.75	64.25		L124	0	9.33	6.28	16.97	1.42	1.75	64.25	1		L124	0	9.33	6.28	16.97	1.42	1.75	64.25
L128	0.72	10.64	0	15.14	4.3	1.36	64.71		L128	0.72	10.64	0	15.14	4.3	1.36	64.71	1.03231		L128	0.743264	10.9838	0	15.6292	4.43894	1.40394	66.8009
L129	1.28	9.98	0	11.37	6.03	0.92	66.48		L129	1.28	9.98	0	11.37	6.03	0.92	66.48	1.04102		L129	1.3325	10.3893	0	11.8364	6.27733	0.957735	69.2067
L138	0.41	13.44	0	10.48	2.2	1.4	66.82		L138	0.41	13.44	0	10.48	2.2	1.4	66.82	1.05541		L138	0.432718	14.1847	0	11.0607	2.3219	1.47757	70.5224
L139	1.97	9.96	0	13.59	4.55	1.13	63		L139	1.97	9.96	0	13.59	4.55	1.13	63	1.06157		L139	2.0913	10.5732	0	14.4268	4.83015	1.19958	66.879
L140	1.45	10.7	0	8.29	2.37	1.64	70.2		L140	1.45	10.7	0	8.29	2.37	1.64	70.2	1.05652		L140	1.53196	11.3048	0	8.75858	2.50396	1.7327	74.168
L142	0	12.23	0	20.01	8.06	0	59.7		L142	0	12.23	0	20.01	8.06	0	59.7	1		L142	0	12.23	0	20.01	8.06	0	59.7
L143	0	12.66	0	21.69	1.72	0	63.93		L143	0	12.66	0	21.69	1.72	0	63.93	1		L143	0	12.66	0	21.69	1.72	0	63.93
L144	1.57	9.35	0	14.02	4.81	1.38	64.92		L144	1.57	9.35	0	14.02	4.81	1.38	64.92	1.04112		L144	1.63457	9.73451	0	14.5966	5.00781	1.43675	67.5898
L145	0.27	9.88	0	13.69	5.32	0.84	65.18		L145	0.27	9.88	0	13.69	5.32	0.84	65.18	1.05064		L145	0.283673	10.3803	0	14.3833	5.58941	0.882538	68.4808
L153	0	12.46	0	18.05	1.27	5.38	61.75		L153	0	12.46	0	18.05	1.27	5.38	61.75	1.01102		L153	0	12.5973	0	18.2489	1.284	5.43929	62.4305
L168	1.2	9.06	0	20.75	2.5	1.87	64.62		L168	1.2	9.06	0	20.75	2.5	1.87	64.62	1		L168	1.2	9.06	0	20.75	2.5	1.87	64.62
L169	1.11	10.58	0	19.17	2.33	2.13	64.69		L169	1.11	10.58	0	19.17	2.33	2.13	64.69	0.9999		L169	1.10989	10.5789	0	19.1681	2.32977	2.12979	64.6835
L170	0.51	10.97	0	18.48	1.81	1.18	67.04		L170	0.51	10.97	0	18.48	1.81	1.18	67.04	1.0001		L170	0.510051	10.9711	0	18.4818	1.81018	1.18012	67.0467
L171	0.33	11.26	0	16.77	1.78	0.94	68.92		L171	0.33	11.26	0	16.77	1.78	0.94	68.92	1		L171	0.33	11.26	0	16.77	1.78	0.94	68.92
L172	0	8.62	0	25.72	1.19	1.12	63.35		L172	0	8.62	0	25.72	1.19	1.12	63.35	1		L172	0	8.62	0	25.72	1.19	1.12	63.35
L173	1.06	9.57	0	24.92	1.64	1.64	61.17		L173	1.06	9.57	0	24.92	1.64	1.64	61.17	1		L173	1.06	9.57	0	24.92	1.64	1.64	61.17
L174	0	11.28	0	17.91	3.22	1.76	65.84		L174	0	11.28	0	17.91	3.22	1.76	65.84	0.9999		L174	0	11.2789	0	17.9082	3.21968	1.75982	65.8334
L175	0.58	10.93	0	16.93	5.07	1.05	65.44		L175	0.58	10.93	0	16.93	5.07	1.05	65.44	1		L175	0.58	10.93	0	16.93	5.07	1.05	65.44
L176	0.11	8.08	0	17.2	5.06	0	69.55		L176	0.11	8.08	0	17.2	5.06	0	69.55	1		L176	0.11	8.08	0	17.2	5.06	0	69.55
L177	0	8.63	9.43	14.76	12.13	1.53	53.51		L177	0	8.63	9.43	14.76	12.13	1.53	53.51	1.0001		L177	0	8.63086	9.43094	14.7615	12.1312	1.53015	53.5154
L186	0	9.65	8.57	16.5	10.83	0	54.46		L186	0	9.65	8.57	16.5	10.83	0	54.46	0.9999		L186	0	9.64904	8.56914	16.4984	10.8289	0	54.4546
L187	0	9.81	8.36	17.01	9.4	0	55.42		L187	0	9.81	8.36	17.01	9.4	0	55.42	1		L187	0	9.81	8.36	17.01	9.4	0	55.42
L188	0	9.96	7.49	12.9	6	0	63.65		L188	0	9.96	7.49	12.9	6	0	63.65	1		L188	0	9.96	7.49	12.9	6	0	63.65
L189	0	10.11	9.74	12.58	6.28	0	61.3		L189	0	10.11	9.74	12.58	6.28	0	61.3	0.9999		L189	0	10.109	9.73903	12.5787	6.27937	0	61.2939
L190	0	8.18	8.8	21.7	6.11	0	55.21		L190	0	8.18	8.8	21.7	6.11	0	55.21	1		L190	0	8.18	8.8	21.7	6.11	0	55.21
L191	0	9.26	7.79	14.1	12.98	0.32	55.54		L191	0	9.26	7.79	14.1	12.98	0.32	55.54	1.0001		L191	0	9.26093	7.79078	14.1014	12.9813	0.320032	55.5456
L192	0	8.09	6.52	16.05	9.33	0.83	55.69		L192	0	8.09	6.52	16.05	9.33	0.83	55.69	1.03616		L192	0	8.38255	6.75578	16.6304	9.66739	0.860015	57.7039
L193	0	11	2.99	10.98	11.48	0	63.55		L193	0	11	2.99	10.98	11.48	0	63.55	1		L193	0	11	2.99	10.98	11.48	0	63.55
L194	0	11.74	4.76	10.9	14.16	0	58.44		L194	0	11.74	4.76	10.9	14.16	0	58.44	1		L194	0	11.74	4.76	10.9	14.16	0	58.44
L195	0	8.64	4.12	12.57	9.9	0	64.77		L195	0	8.64	4.12	12.57	9.9	0	64.77	1		L195	0	8.64	4.12	12.57	9.9	0	64.77
L196	0	12.69	4.12	11.41	18.58	0	53.19		L196	0	12.69	4.12	11.41	18.58	0	53.19	1.0001		L196	0	12.6913	4.12041	11.4111	18.5819	0	53.1953
L197	0	11.32	4.77	12.86	8.5	0	62.55		L197	0	11.32	4.77	12.86	8.5	0	62.55	1		L197	0	11.32	4.77	12.86	8.5	0	62.55
L200	0.48	10.39	6.56	13.53	6.7	1.64	60.7		L200	0.48	10.39	6.56	13.53	6.7	1.64	60.7	1		L200	0.48	10.39	6.56	13.53	6.7	1.64	60.7
L201	0.76	9.48	2.93	16.02	5.66	1.01	63.85		L201	0.76	9.48	2.93	16.02	5.66	1.01	63.85	1.00291		L201	0.76221	9.50757	2.93852	16.0666	5.67646	1.01294	64.0357
L202	0.3	7.89	1.61	24.03	6.02	1.66	58.27		L202	0.3	7.89	1.61	24.03	6.02	1.66	58.27	1.0022		L202	0.300661	7.9074	1.61355	24.083	6.03327	1.66366	58.3985

## Sheet: 3. Code output
Cl
		Residuals:					> mom
		Min 1Q Median 3Q Max					[,1] [,2] [,3] [,4] [,5]
		-0.79888 -0.06621 0.06940 0.13456 0.28589					[1,] "Mean ros" "Stdev ros" "Median ros" "Mean raw" "Stdev raw"
							[2,] "4.0854552485003" "2.80712033015783" "2.96" "3.5216" "3.19395881281509"
		Coefficients:
		Estimate Std. Error t value Pr(>|t|)					> ecdf
		(Intercept) 1.16506 0.09503 12.259 4.90e-11 ***					n n.cen median mean sd
		pp.nq 0.73934 0.09649 7.662 1.63e-07 ***					50.000000 27.000000 NA 3.851000 2.968444
		---					> #plot(ecdf)
		Signif. codes: 0 ‘***’ 0.001 ‘**’ 0.01 ‘*’ 0.05 ‘.’ 0.1 ‘ ’ 1					> quantile(ecdf)
							5% 10% 25% 50% 75% 90% 95%
		Residual standard error: 0.239 on 21 degrees of freedom					NA NA NA NA 6.34 8.36 9.43
		Multiple R-squared: 0.7365, Adjusted R-squared: 0.724
		F-statistic: 58.71 on 1 and 21 DF, p-value: 1.633e-07
									X1	X2	X3	X4	X5
								1	Mean ros	Stdev ros	Median ros	Mean raw	Stdev raw
			obs	censored	pp	modeled		2	4.0854552485003	2.80712033015783	2.96	3.5216	3.19395881281509
		1	1	TRUE	0.0192857	0.694589
		2	1	TRUE	0.0385714	0.867854
		3	1	TRUE	0.0578571	1.00206
		4	1	TRUE	0.0771429	1.11832
		5	1	TRUE	0.0964286	1.22423
		6	1	TRUE	0.115714	1.32353
		7	1	TRUE	0.135	1.41839
		8	1	TRUE	0.154286	1.5102
		9	1	TRUE	0.173571	1.59995
		10	1	TRUE	0.192857	1.68834
		11	1	TRUE	0.212143	1.77592
		12	1	TRUE	0.231429	1.86315
		13	1	TRUE	0.250714	1.95041
		14	1	TRUE	0.27	2.03802
		15	1	TRUE	0.289286	2.12628
		16	1	TRUE	0.308571	2.21546
		17	1	TRUE	0.327857	2.30581
		18	1	TRUE	0.347143	2.39759
		19	1	TRUE	0.366429	2.49104
		20	1	TRUE	0.385714	2.58642
		21	1	TRUE	0.405	2.68398
		22	1	TRUE	0.424286	2.78399
		23	1	TRUE	0.443571	2.88675
		24	1	TRUE	0.462857	2.99254
		25	1	TRUE	0.482143	3.10171
		26	1	TRUE	0.501429	3.2146
		27	1	TRUE	0.520714	3.33163
		28	1.61	FALSE	0.559167	1.61
		29	2.93	FALSE	0.578333	2.93
		30	2.99	FALSE	0.5975	2.99
		31	4.12	FALSE	0.616667	4.12
		32	4.12	FALSE	0.635833	4.12
		33	4.76	FALSE	0.655	4.76
		34	4.77	FALSE	0.674167	4.77
		35	6.2	FALSE	0.693333	6.2
		36	6.22	FALSE	0.7125	6.22
		37	6.28	FALSE	0.731667	6.28
		38	6.34	FALSE	0.750833	6.34
		39	6.52	FALSE	0.77	6.52
		40	6.54	FALSE	0.789167	6.54
		41	6.56	FALSE	0.808333	6.56
		42	7.49	FALSE	0.8275	7.49
		43	7.51	FALSE	0.846667	7.51
		44	7.79	FALSE	0.865833	7.79
		45	8.36	FALSE	0.885	8.36
		46	8.57	FALSE	0.904167	8.57
		47	8.8	FALSE	0.923333	8.8
		48	9.43	FALSE	0.9425	9.43
		49	9.74	FALSE	0.961667	9.74
		50	11.43	FALSE	0.980833	11.43
Sr
		Residuals:						> mom[2,]=c(mean(model),sd(model),median(model),mean(t1[,i]),sd(t1[,i]))
		Min 1Q Median 3Q Max						> as.numeric(mom[2,])
		-0.13749 -0.05792 -0.00477 0.02928 0.44101						[1] 1.3157979 0.7960100 1.1550000 1.4276000 0.7106466
		Coefficients:						> #Computes an estimate of an empirical cumulative distribution function (ECDF)
		Estimate Std. Error t value Pr(>|t|)						> # for censored data using the Kaplan-Meier method.
		(Intercept) 0.13998 0.02994 4.675 7.30e-05 ***						> ecdf=cenfit(obs=t1[,i], censored=t1[,(i+1)])
		pp.nq 0.53281 0.03427 15.549 5.37e-15 ***						> ecdf
		---						n n.cen median mean sd
		Signif. codes: 0 ‘***’ 0.001 ‘**’ 0.01 ‘*’ 0.05 ‘.’ 0.1 ‘ ’ 1						50.0000000 21.0000000 1.1300000 1.4318000 0.7133716
								> #plot(ecdf)
		Residual standard error: 0.1071 on 27 degrees of freedom						> quantile(ecdf)
		Multiple R-squared: 0.8995, Adjusted R-squared: 0.8958						5% 10% 25% 50% 75% 90% 95%
		F-statistic: 241.8 on 1 and 27 DF, p-value: 5.37e-15						NA NA NA 1.13 1.64 2.07 2.50
			obs	censored	pp	modeled			X1	X2	X3	X4	X5
		1	1	TRUE	0.0190909	0.38118		1	Mean ros	Stdev ros	Median ros	Mean raw	Stdev raw
		2	1	TRUE	0.0381818	0.447418		2	1.31579787497392	0.796009975374056	1.155	1.4276	0.710646615586747
		3	1	TRUE	0.0572727	0.496166
		4	1	TRUE	0.0763636	0.536911
		5	1	TRUE	0.0954545	0.572992
		6	1	TRUE	0.114545	0.606024
		7	1	TRUE	0.133636	0.636924
		8	1	TRUE	0.152727	0.666276
		9	1	TRUE	0.171818	0.694476
		10	1	TRUE	0.190909	0.72181
		11	1	TRUE	0.21	0.748494
		12	1	TRUE	0.229091	0.774696
		13	1	TRUE	0.248182	0.800553
		14	1	TRUE	0.267273	0.82618
		15	1	TRUE	0.286364	0.851676
		16	1	TRUE	0.305455	0.877126
		17	1	TRUE	0.324545	0.90261
		18	1	TRUE	0.343636	0.928198
		19	1	TRUE	0.362727	0.953959
		20	1	TRUE	0.381818	0.97996
		21	1	TRUE	0.400909	1.00626
		22	1.01	FALSE	0.439333	1.01
		23	1.05	FALSE	0.458667	1.05
		24	1.12	FALSE	0.478	1.12
		25	1.13	FALSE	0.497333	1.13
		26	1.18	FALSE	0.516667	1.18
		27	1.34	FALSE	0.536	1.34
		28	1.36	FALSE	0.555333	1.36
		29	1.37	FALSE	0.574667	1.37
		30	1.38	FALSE	0.594	1.38
		31	1.39	FALSE	0.613333	1.39
		32	1.4	FALSE	0.632667	1.4
		33	1.42	FALSE	0.652	1.42
		34	1.45	FALSE	0.671333	1.45
		35	1.53	FALSE	0.690667	1.53
		36	1.64	FALSE	0.71	1.64
		37	1.64	FALSE	0.729333	1.64
		38	1.64	FALSE	0.748667	1.64
		39	1.66	FALSE	0.768	1.66
		40	1.66	FALSE	0.787333	1.66
		41	1.75	FALSE	0.806667	1.75
		42	1.76	FALSE	0.826	1.76
		43	1.84	FALSE	0.845333	1.84
		44	1.87	FALSE	0.864667	1.87
		45	2.07	FALSE	0.884	2.07
		46	2.13	FALSE	0.903333	2.13
		47	2.14	FALSE	0.922667	2.14
		48	2.5	FALSE	0.942	2.5
		49	2.57	FALSE	0.961333	2.57
		50	5.38	FALSE	0.980667	5.38

## Sheet: 4. mc2 Censored
No	MgC	ClC	Ca	As	SrC	Ba		No	MgC	ClC	Clx	Ca	As	SrC	Srx	Ba		No	MgC	ClC	ClR	Ca	As	SrC	SrR	Ba
L019	12.04	1	14.57	9.98	1	54.01		L019	12.04	1	TRUE	14.57	9.98	1	TRUE	54.01		L019	12.04	1	0.694589	14.57	9.98	1	0.38118	54.01
L034	10.05	1	16.13	1.17	2.5	64.32		L034	10.05	1	TRUE	16.13	1.17	2.5	FALSE	64.32		L034	10.05	1	0.867854	16.13	1.17	2.5	0.447418	64.32
L093	8.56	1	16.47	4.91	1.45	64.31		L093	8.56	1	TRUE	16.47	4.91	1.45	FALSE	64.31		L093	8.56	1	1.00206	16.47	4.91	1.45	0.496166	64.31
L094	8.44	1	13.27	2.3	1.39	71.8		L094	8.44	1	TRUE	13.27	2.3	1.39	FALSE	71.8		L094	8.44	1	1.11832	13.27	2.3	1.39	0.536911	71.8
L095	9.35	1	12.91	2.42	2.14	67.04		L095	9.35	1	TRUE	12.91	2.42	2.14	FALSE	67.04		L095	9.35	1	1.22423	12.91	2.42	2.14	0.572992	67.04
L096	8.84	1	15.59	2.36	2.07	65.91		L096	8.84	1	TRUE	15.59	2.36	2.07	FALSE	65.91		L096	8.84	1	1.32353	15.59	2.36	2.07	0.606024	65.91
L097	9.3	1	12.7	2.41	2.57	67.64		L097	9.3	1	TRUE	12.7	2.41	2.57	FALSE	67.64		L097	9.3	1	1.41839	12.7	2.41	2.57	0.636924	67.64
L098	10.14	1	14.68	1.67	1.84	67.43		L098	10.14	1	TRUE	14.68	1.67	1.84	FALSE	67.43		L098	10.14	1	1.5102	14.68	1.67	1.84	0.666276	67.43
L114	8.84	6.2	14.1	2.96	1.66	62.34		L114	8.84	6.2	FALSE	14.1	2.96	1.66	FALSE	62.34		L114	8.84	6.2	1.59995	14.1	2.96	1.66	0.694476	62.34
L115	7.16	7.51	19.14	3.09	1.42	59.75		L115	7.16	7.51	FALSE	19.14	3.09	1.42	FALSE	59.75		L115	7.16	7.51	1.68834	19.14	3.09	1.42	0.72181	59.75
L117	10.67	6.34	12.03	3.21	1.37	61.78		L117	10.67	6.34	FALSE	12.03	3.21	1.37	FALSE	61.78		L117	10.67	6.34	1.77592	12.03	3.21	1.37	0.748494	61.78
L118	7.42	6.22	13.48	3.3	1.34	62.21		L118	7.42	6.22	FALSE	13.48	3.3	1.34	FALSE	62.21		L118	7.42	6.22	1.86315	13.48	3.3	1.34	0.774696	62.21
L121	7.66	6.54	14.18	1.91	1	56.93		L121	7.66	6.54	FALSE	14.18	1.91	1	TRUE	56.93		L121	7.66	6.54	1.95041	14.18	1.91	1	0.800553	56.93
L122	7.13	11.43	16.35	2.74	1	61.42		L122	7.13	11.43	FALSE	16.35	2.74	1	TRUE	61.42		L122	7.13	11.43	2.03802	16.35	2.74	1	0.82618	61.42
L124	9.33	6.28	16.97	1.42	1.75	64.25		L124	9.33	6.28	FALSE	16.97	1.42	1.75	FALSE	64.25		L124	9.33	6.28	2.12628	16.97	1.42	1.75	0.851676	64.25
L128	10.64	1	15.14	4.3	1.36	64.71		L128	10.64	1	TRUE	15.14	4.3	1.36	FALSE	64.71		L128	10.64	1	2.21546	15.14	4.3	1.36	0.877126	64.71
L129	9.98	1	11.37	6.03	1	66.48		L129	9.98	1	TRUE	11.37	6.03	1	TRUE	66.48		L129	9.98	1	2.30581	11.37	6.03	1	0.90261	66.48
L138	13.44	1	10.48	2.2	1.4	66.82		L138	13.44	1	TRUE	10.48	2.2	1.4	FALSE	66.82		L138	13.44	1	2.39759	10.48	2.2	1.4	0.928198	66.82
L139	9.96	1	13.59	4.55	1.13	63		L139	9.96	1	TRUE	13.59	4.55	1.13	FALSE	63		L139	9.96	1	2.49104	13.59	4.55	1.13	0.953959	63
L140	10.7	1	8.29	2.37	1.64	70.2		L140	10.7	1	TRUE	8.29	2.37	1.64	FALSE	70.2		L140	10.7	1	2.58642	8.29	2.37	1.64	0.97996	70.2
L142	12.23	1	20.01	8.06	1	59.7		L142	12.23	1	TRUE	20.01	8.06	1	TRUE	59.7		L142	12.23	1	2.68398	20.01	8.06	1	1.00626	59.7
L143	12.66	1	21.69	1.72	1	63.93		L143	12.66	1	TRUE	21.69	1.72	1	TRUE	63.93		L143	12.66	1	2.78399	21.69	1.72	1	1.01	63.93
L144	9.35	1	14.02	4.81	1.38	64.92		L144	9.35	1	TRUE	14.02	4.81	1.38	FALSE	64.92		L144	9.35	1	2.88675	14.02	4.81	1.38	1.05	64.92
L145	9.88	1	13.69	5.32	1	65.18		L145	9.88	1	TRUE	13.69	5.32	1	TRUE	65.18		L145	9.88	1	2.99254	13.69	5.32	1	1.12	65.18
L153	12.46	1	18.05	1.27	5.38	61.75		L153	12.46	1	TRUE	18.05	1.27	5.38	FALSE	61.75		L153	12.46	1	3.10171	18.05	1.27	5.38	1.13	61.75
L168	9.06	1	20.75	2.5	1.87	64.62		L168	9.06	1	TRUE	20.75	2.5	1.87	FALSE	64.62		L168	9.06	1	3.2146	20.75	2.5	1.87	1.18	64.62
L169	10.58	1	19.17	2.33	2.13	64.69		L169	10.58	1	TRUE	19.17	2.33	2.13	FALSE	64.69		L169	10.58	1	3.33163	19.17	2.33	2.13	1.34	64.69
L170	10.97	1	18.48	1.81	1.18	67.04		L170	10.97	1	TRUE	18.48	1.81	1.18	FALSE	67.04		L170	10.97	1	1.61	18.48	1.81	1.18	1.36	67.04
L171	11.26	1	16.77	1.78	1	68.92		L171	11.26	1	TRUE	16.77	1.78	1	TRUE	68.92		L171	11.26	1	2.93	16.77	1.78	1	1.37	68.92
L172	8.62	1	25.72	1.19	1.12	63.35		L172	8.62	1	TRUE	25.72	1.19	1.12	FALSE	63.35		L172	8.62	1	2.99	25.72	1.19	1.12	1.38	63.35
L173	9.57	1	24.92	1.64	1.64	61.17		L173	9.57	1	TRUE	24.92	1.64	1.64	FALSE	61.17		L173	9.57	1	4.12	24.92	1.64	1.64	1.39	61.17
L174	11.28	1	17.91	3.22	1.76	65.84		L174	11.28	1	TRUE	17.91	3.22	1.76	FALSE	65.84		L174	11.28	1	4.12	17.91	3.22	1.76	1.4	65.84
L175	10.93	1	16.93	5.07	1.05	65.44		L175	10.93	1	TRUE	16.93	5.07	1.05	FALSE	65.44		L175	10.93	1	4.76	16.93	5.07	1.05	1.42	65.44
L176	8.08	1	17.2	5.06	1	69.55		L176	8.08	1	TRUE	17.2	5.06	1	TRUE	69.55		L176	8.08	1	4.77	17.2	5.06	1	1.45	69.55
L177	8.63	9.43	14.76	12.13	1.53	53.51		L177	8.63	9.43	FALSE	14.76	12.13	1.53	FALSE	53.51		L177	8.63	9.43	6.2	14.76	12.13	1.53	1.53	53.51
L186	9.65	8.57	16.5	10.83	1	54.46		L186	9.65	8.57	FALSE	16.5	10.83	1	TRUE	54.46		L186	9.65	8.57	6.22	16.5	10.83	1	1.64	54.46
L187	9.81	8.36	17.01	9.4	1	55.42		L187	9.81	8.36	FALSE	17.01	9.4	1	TRUE	55.42		L187	9.81	8.36	6.28	17.01	9.4	1	1.64	55.42
L188	9.96	7.49	12.9	6	1	63.65		L188	9.96	7.49	FALSE	12.9	6	1	TRUE	63.65		L188	9.96	7.49	6.34	12.9	6	1	1.64	63.65
L189	10.11	9.74	12.58	6.28	1	61.3		L189	10.11	9.74	FALSE	12.58	6.28	1	TRUE	61.3		L189	10.11	9.74	6.52	12.58	6.28	1	1.66	61.3
L190	8.18	8.8	21.7	6.11	1	55.21		L190	8.18	8.8	FALSE	21.7	6.11	1	TRUE	55.21		L190	8.18	8.8	6.54	21.7	6.11	1	1.66	55.21
L191	9.26	7.79	14.1	12.98	1	55.54		L191	9.26	7.79	FALSE	14.1	12.98	1	TRUE	55.54		L191	9.26	7.79	6.56	14.1	12.98	1	1.75	55.54
L192	8.09	6.52	16.05	9.33	1	55.69		L192	8.09	6.52	FALSE	16.05	9.33	1	TRUE	55.69		L192	8.09	6.52	7.49	16.05	9.33	1	1.76	55.69
L193	11	2.99	10.98	11.48	1	63.55		L193	11	2.99	FALSE	10.98	11.48	1	TRUE	63.55		L193	11	2.99	7.51	10.98	11.48	1	1.84	63.55
L194	11.74	4.76	10.9	14.16	1	58.44		L194	11.74	4.76	FALSE	10.9	14.16	1	TRUE	58.44		L194	11.74	4.76	7.79	10.9	14.16	1	1.87	58.44
L195	8.64	4.12	12.57	9.9	1	64.77		L195	8.64	4.12	FALSE	12.57	9.9	1	TRUE	64.77		L195	8.64	4.12	8.36	12.57	9.9	1	2.07	64.77
L196	12.69	4.12	11.41	18.58	1	53.19		L196	12.69	4.12	FALSE	11.41	18.58	1	TRUE	53.19		L196	12.69	4.12	8.57	11.41	18.58	1	2.13	53.19
L197	11.32	4.77	12.86	8.5	1	62.55		L197	11.32	4.77	FALSE	12.86	8.5	1	TRUE	62.55		L197	11.32	4.77	8.8	12.86	8.5	1	2.14	62.55
L200	10.39	6.56	13.53	6.7	1.64	60.7		L200	10.39	6.56	FALSE	13.53	6.7	1.64	FALSE	60.7		L200	10.39	6.56	9.43	13.53	6.7	1.64	2.5	60.7
L201	9.48	2.93	16.02	5.66	1.01	63.85		L201	9.48	2.93	FALSE	16.02	5.66	1.01	FALSE	63.85		L201	9.48	2.93	9.74	16.02	5.66	1.01	2.57	63.85
L202	7.89	1.61	24.03	6.02	1.66	58.27		L202	7.89	1.61	FALSE	24.03	6.02	1.66	FALSE	58.27		L202	7.89	1.61	11.43	24.03	6.02	1.66	5.38	58.27
	0	27	0	0	21	0												Mean	9.8684	3.5216	4.08546	15.693	5.3028	1.4276	1.3158	62.571
[ND%=1]	0	0.54	0	0	0.42	0												SD	1.52093	3.19396	2.80712	3.7558	3.96411	0.710647	0.79601	4.59708
																		Median	9.845	1	2.96	14.95	4.425	1.155	1.155	63.6
