# Supplementary material for: First Observation of Unicellular Organisms Concentrating Arsenic in ACC Intracellular Inclusions
Source: Preprints.org preprint supplement (doi:10.20944/preprints202111.0267.v1), 2021-11-16
Supplement: Supplementary file 2 [file supplementary]

Archive with 3 entries (3 files):
- As micropearls Sup Info.pdf
- SI_excel_1.xlsx
- SI_excel_2.xlsx
